# Supplementary material for: Translocation of Foliar Absorbed Zn in Sunflower (Helianthus annuus) Leaves
Source: Front Plant Sci. 2022 Mar 2;13:757048. doi: 10.3389/fpls.2022.757048 (PMC8924476; doi:10.3389/fpls.2022.757048)
Supplement: Supplementary file 4 [file Data_Sheet_3.XLSX]

## Sheet: L1 VS L0
Additional file 3: List of the significantly enriched GO terms among the DEGs. Sheet 1 is L1 VS L0, sheet 2 is L2 VS L1, and sheet 3 is L2 VS L0, with the up regulated and down regulated terms listed in separate tables. The GO terms with padj<0.05 were considered significantly enriched terms. Category refers to the three function classification of the GO terms: biological process (BP), cellular c…
L1 VS L0 up
Category	GO ID	Description	Gene Ratio	Bg Ratio	pvalue	padj	Gene ID	Gene Name	Count
MF	GO:0016798	hydrolase activity, acting on glycosyl bonds	120/3309	356/16508	7.19252e-10	2.66843e-07	110921103/110885786/110879976/110929955/110910101/110869194/110941647/110885787/110908804/110880246/110915001/110897621/110918827/110895514/110921686/110929923/110908934/110889115/110898575/110864801/110941396/110886626/110915454/110864490/110868183/110930247/110878463/110911281/110921775/110898008/110940572/110885407/110920578/110926060/110917272/110884331/110905146/110864782/110926292/110889316…	LOC110921103/LOC110885786/LOC110879976/LOC110929955/LOC110910101/LOC110869194/LOC110941647/LOC110885787/LOC110908804/LOC110880246/LOC110915001/LOC110897621/LOC110918827/LOC110895514/LOC110921686/LOC110929923/LOC110908934/LOC110889115/LOC110898575/LOC110864801/LOC110941396/LOC110886626/LOC110915454/LOC110864490/LOC110868183/LOC110930247/LOC110878463/LOC110911281/LOC110921775/LOC110898008/LOC110940…	120
MF	GO:0004553	hydrolase activity, hydrolyzing O-glycosyl compounds	111/3309	335/16508	9.19361e-09	1.70541e-06	110921103/110885786/110879976/110929955/110910101/110869194/110941647/110885787/110908804/110880246/110915001/110897621/110918827/110921686/110929923/110908934/110889115/110898575/110864801/110941396/110915454/110864490/110930247/110878463/110911281/110921775/110898008/110940572/110885407/110920578/110926060/110884331/110905146/110864782/110926292/110889316/110871944/110880245/110878180/110899444…	LOC110921103/LOC110885786/LOC110879976/LOC110929955/LOC110910101/LOC110869194/LOC110941647/LOC110885787/LOC110908804/LOC110880246/LOC110915001/LOC110897621/LOC110918827/LOC110921686/LOC110929923/LOC110908934/LOC110889115/LOC110898575/LOC110864801/LOC110941396/LOC110915454/LOC110864490/LOC110930247/LOC110878463/LOC110911281/LOC110921775/LOC110898008/LOC110940572/LOC110885407/LOC110920578/LOC110926…	111
MF	GO:0016747	transferase activity, transferring acyl groups other than amino-acyl groups	77/3309	219/16508	1.12202e-07	1.38757e-05	110911701/110926692/110881068/110940605/110918282/110928960/110886259/110923011/110937516/110865789/110930996/110941263/110884356/110865504/110885651/110911294/110938238/110909196/110941383/110905106/110941977/110909079/110911605/110890001/110900142/110880003/110918434/110921508/110886679/110914973/110935924/110921619/110891233/110914980/110921298/110904922/110922153/110883866/110891234/110911828…	LOC110911701/LOC110926692/LOC110881068/LOC110940605/LOC110918282/LOC110928960/LOC110886259/LOC110923011/LOC110937516/LOC110865789/LOC110930996/LOC110941263/LOC110884356/LOC110865504/LOC110885651/LOC110911294/LOC110938238/LOC110909196/LOC110941383/LOC110905106/LOC110941977/LOC110909079/LOC110911605/LOC110890001/LOC110900142/LOC110880003/LOC110918434/LOC110921508/LOC110886679/LOC110914973/LOC110935…	77
MF	GO:0016746	transferase activity, transferring acyl groups	87/3309	272/16508	1.91103e-06	0.000177248	110911701/110926692/110881068/110940605/110918282/110928960/110886259/110923011/110937516/110865789/110930996/110941263/110884356/110865504/110885651/110911294/110938238/110909196/110941383/110905106/110941977/110909079/110911605/110890001/110885586/110900142/110880003/110918434/110921508/110886679/110914973/110935924/110921619/110900391/110891233/110914980/110921298/110904922/110912355/110922153…	LOC110911701/LOC110926692/LOC110881068/LOC110940605/LOC110918282/LOC110928960/LOC110886259/LOC110923011/LOC110937516/LOC110865789/LOC110930996/LOC110941263/LOC110884356/LOC110865504/LOC110885651/LOC110911294/LOC110938238/LOC110909196/LOC110941383/LOC110905106/LOC110941977/LOC110909079/LOC110911605/LOC110890001/LOC110885586/LOC110900142/LOC110880003/LOC110918434/LOC110921508/LOC110886679/LOC110914…	87
MF	GO:0030246	carbohydrate binding	59/3309	167/16508	2.74428e-06	0.000203625	110903783/110869072/110879976/110886521/110886512/110903784/110925840/110909009/110909317/110929368/110903782/110895392/110929247/110903775/110940642/110915454/110930247/110878463/110872621/110927059/110897349/110937614/110926060/110879231/110865572/110915621/110930447/110929363/110880215/110886499/110927327/110931016/110922704/110897348/110937930/110871855/110939865/110872862/110903724/110915112…	LOC110903783/LOC110869072/LOC110879976/LOC110886521/LOC110886512/LOC110903784/LOC110925840/LOC110909009/LOC110909317/LOC110929368/LOC110903782/LOC110895392/LOC110929247/LOC110903775/LOC110940642/LOC110915454/LOC110930247/LOC110878463/LOC110872621/LOC110927059/LOC110897349/LOC110937614/LOC110926060/LOC110879231/LOC110865572/LOC110915621/LOC110930447/LOC110929363/LOC110880215/LOC110886499/LOC110927…	59
MF	GO:0004867	serine-type endopeptidase inhibitor activity	9/3309	10/16508	4.24666e-06	0.000262585	110937706/110936166/110937716/110937731/110935737/110884568/110865666/novel.177/110936141	LOC110937706/LOC110936166/LOC110937716/LOC110937731/LOC110935737/LOC110884568/LOC110865666/-/LOC110936141	9
CC	GO:0071944	cell periphery	51/665	155/3553	1.13877e-05	0.000737942	110867850/110940526/110926037/110911281/110869237/110926312/110898008/110942421/110935912/110889316/110886163/110893680/110940246/110898390/110867026/110907748/110895792/110900061/110921057/110900062/110894160/110895465/110888107/110873213/110911940/110920654/110867890/110880309/110937894/110927034/110908420/110907747/110865760/110880308/110886930/110920730/110907745/110884283/110873111/110935442…	LOC110867850/LOC110940526/LOC110926037/LOC110911281/LOC110869237/LOC110926312/LOC110898008/LOC110942421/LOC110935912/LOC110889316/LOC110886163/LOC110893680/LOC110940246/LOC110898390/LOC110867026/LOC110907748/LOC110895792/LOC110900061/LOC110921057/LOC110900062/LOC110894160/LOC110895465/LOC110888107/LOC110873213/LOC110911940/LOC110920654/LOC110867890/LOC110880309/LOC110937894/LOC110927034/LOC110908…	51
CC	GO:0009521	photosystem	25/665	58/3553	1.39234e-05	0.000737942	110877033/110884044/110911785/110936478/110925655/110873548/110894815/110928439/110865283/110899054/110935819/110942165/110879131/110873544/110930236/110865288/110884480/110944637/110868758/110890423/110889561/110864906/110894458/110921533/110877741	LOC110877033/LOC110884044/LOC110911785/LOC110936478/LOC110925655/LOC110873548/LOC110894815/LOC110928439/LOC110865283/LOC110899054/LOC110935819/LOC110942165/LOC110879131/LOC110873544/LOC110930236/LOC110865288/LOC110884480/LOC110944637/LOC110868758/LOC110890423/LOC110889561/LOC110864906/LOC110894458/LOC110921533/LOC110877741	25
MF	GO:0004857	enzyme inhibitor activity	42/3309	113/16508	1.78517e-05	0.000946142	110923710/110937706/110936166/110884262/110937716/110870592/110869237/110942421/110935912/110899639/110937731/110893680/110940246/110900204/110900061/110900062/110894160/110935737/110938035/110865448/110926788/110911940/110884568/110904629/110880309/110930178/110865760/110880308/110869190/110903871/110897940/110884283/110930591/110865666/110935442/110894418/110930898/novel.177/110918735/110931108…	LOC110923710/LOC110937706/LOC110936166/LOC110884262/LOC110937716/LOC110870592/LOC110869237/LOC110942421/LOC110935912/LOC110899639/LOC110937731/LOC110893680/LOC110940246/LOC110900204/LOC110900061/LOC110900062/LOC110894160/LOC110935737/LOC110938035/LOC110865448/LOC110926788/LOC110911940/LOC110884568/LOC110904629/LOC110880309/LOC110930178/LOC110865760/LOC110880308/LOC110869190/LOC110903871/LOC110897…	42
MF	GO:0008171	O-methyltransferase activity	25/3309	57/16508	3.78767e-05	0.00175653	110935949/110911104/110918606/110895909/110872995/110915463/110885616/110935947/110918576/110877051/110877050/110872997/110877054/110883878/110937336/110883877/110872993/110872994/110918619/110918544/110918578/110935053/110941106/110912701/110877057	LOC110935949/LOC110911104/LOC110918606/LOC110895909/LOC110872995/LOC110915463/LOC110885616/LOC110935947/LOC110918576/LOC110877051/LOC110877050/LOC110872997/LOC110877054/LOC110883878/LOC110937336/LOC110883877/LOC110872993/LOC110872994/LOC110918619/LOC110918544/LOC110918578/LOC110935053/LOC110941106/LOC110912701/LOC110877057	25
CC	GO:0034357	photosynthetic membrane	25/665	62/3553	5.48673e-05	0.00193865	110877033/110884044/110911785/110936478/110925655/110873548/110894815/110928439/110865283/110899054/110935819/110942165/110879131/110873544/110930236/110865288/110884480/110944637/110868758/110890423/110889561/110864906/110894458/110921533/110877741	LOC110877033/LOC110884044/LOC110911785/LOC110936478/LOC110925655/LOC110873548/LOC110894815/LOC110928439/LOC110865283/LOC110899054/LOC110935819/LOC110942165/LOC110879131/LOC110873544/LOC110930236/LOC110865288/LOC110884480/LOC110944637/LOC110868758/LOC110890423/LOC110889561/LOC110864906/LOC110894458/LOC110921533/LOC110877741	25
CC	GO:0009579	thylakoid	25/665	64/3553	0.000102	0.00216239	110877033/110884044/110911785/110936478/110925655/110873548/110894815/110928439/110865283/110899054/110935819/110942165/110879131/110873544/110930236/110865288/110884480/110944637/110868758/110890423/110889561/110864906/110894458/110921533/110877741	LOC110877033/LOC110884044/LOC110911785/LOC110936478/LOC110925655/LOC110873548/LOC110894815/LOC110928439/LOC110865283/LOC110899054/LOC110935819/LOC110942165/LOC110879131/LOC110873544/LOC110930236/LOC110865288/LOC110884480/LOC110944637/LOC110868758/LOC110890423/LOC110889561/LOC110864906/LOC110894458/LOC110921533/LOC110877741	25
CC	GO:0044436	thylakoid part	25/665	64/3553	0.000102	0.00216239	110877033/110884044/110911785/110936478/110925655/110873548/110894815/110928439/110865283/110899054/110935819/110942165/110879131/110873544/110930236/110865288/110884480/110944637/110868758/110890423/110889561/110864906/110894458/110921533/110877741	LOC110877033/LOC110884044/LOC110911785/LOC110936478/LOC110925655/LOC110873548/LOC110894815/LOC110928439/LOC110865283/LOC110899054/LOC110935819/LOC110942165/LOC110879131/LOC110873544/LOC110930236/LOC110865288/LOC110884480/LOC110944637/LOC110868758/LOC110890423/LOC110889561/LOC110864906/LOC110894458/LOC110921533/LOC110877741	25
CC	GO:0005618	cell wall	30/665	86/3553	0.000240552	0.00364264	110940526/110911281/110869237/110898008/110942421/110935912/110889316/110886163/110893680/110940246/110898390/110895792/110900061/110900062/110894160/110895465/110911940/110880309/110927034/110865760/110880308/110886930/110920730/110884283/110873111/110935442/110894418/110931108/110865209/110903820	LOC110940526/LOC110911281/LOC110869237/LOC110898008/LOC110942421/LOC110935912/LOC110889316/LOC110886163/LOC110893680/LOC110940246/LOC110898390/LOC110895792/LOC110900061/LOC110900062/LOC110894160/LOC110895465/LOC110911940/LOC110880309/LOC110927034/LOC110865760/LOC110880308/LOC110886930/LOC110920730/LOC110884283/LOC110873111/LOC110935442/LOC110894418/LOC110931108/LOC110865209/LOC110903820	30
CC	GO:0030312	external encapsulating structure	30/665	86/3553	0.000240552	0.00364264	110940526/110911281/110869237/110898008/110942421/110935912/110889316/110886163/110893680/110940246/110898390/110895792/110900061/110900062/110894160/110895465/110911940/110880309/110927034/110865760/110880308/110886930/110920730/110884283/110873111/110935442/110894418/110931108/110865209/110903820	LOC110940526/LOC110911281/LOC110869237/LOC110898008/LOC110942421/LOC110935912/LOC110889316/LOC110886163/LOC110893680/LOC110940246/LOC110898390/LOC110895792/LOC110900061/LOC110900062/LOC110894160/LOC110895465/LOC110911940/LOC110880309/LOC110927034/LOC110865760/LOC110880308/LOC110886930/LOC110920730/LOC110884283/LOC110873111/LOC110935442/LOC110894418/LOC110931108/LOC110865209/LOC110903820	30
MF	GO:0008236	serine-type peptidase activity	48/3309	143/16508	9.82307e-05	0.00364436	110921948/110918244/110940598/110889345/110930520/110893961/110940526/110880303/110925975/110889271/110895500/110912274/110926012/110865743/110886163/110911034/110912893/110877713/110915722/110908659/110927019/110912890/110938285/110865428/110874817/110879148/110870764/110904561/110875636/110898270/110912266/110942227/110942217/110941004/110885815/110940525/110886317/110905072/110931716/110920900…	LOC110921948/LOC110918244/LOC110940598/LOC110889345/LOC110930520/LOC110893961/LOC110940526/LOC110880303/LOC110925975/LOC110889271/LOC110895500/LOC110912274/LOC110926012/LOC110865743/LOC110886163/LOC110911034/LOC110912893/LOC110877713/LOC110915722/LOC110908659/LOC110927019/LOC110912890/LOC110938285/LOC110865428/LOC110874817/LOC110879148/LOC110870764/LOC110904561/LOC110875636/LOC110898270/LOC110912…	48
MF	GO:0017171	serine hydrolase activity	48/3309	143/16508	9.82307e-05	0.00364436	110921948/110918244/110940598/110889345/110930520/110893961/110940526/110880303/110925975/110889271/110895500/110912274/110926012/110865743/110886163/110911034/110912893/110877713/110915722/110908659/110927019/110912890/110938285/110865428/110874817/110879148/110870764/110904561/110875636/110898270/110912266/110942227/110942217/110941004/110885815/110940525/110886317/110905072/110931716/110920900…	LOC110921948/LOC110918244/LOC110940598/LOC110889345/LOC110930520/LOC110893961/LOC110940526/LOC110880303/LOC110925975/LOC110889271/LOC110895500/LOC110912274/LOC110926012/LOC110865743/LOC110886163/LOC110911034/LOC110912893/LOC110877713/LOC110915722/LOC110908659/LOC110927019/LOC110912890/LOC110938285/LOC110865428/LOC110874817/LOC110879148/LOC110870764/LOC110904561/LOC110875636/LOC110898270/LOC110912…	48
BP	GO:0009611	response to wounding	9/2272	10/10514	8.18014e-06	0.00377922	110937706/110936166/110937716/110937731/110935737/110884568/110865666/novel.177/110936141	LOC110937706/LOC110936166/LOC110937716/LOC110937731/LOC110935737/LOC110884568/LOC110865666/-/LOC110936141	9
MF	GO:0004866	endopeptidase inhibitor activity	15/3309	30/16508	0.000233921	0.005843	110923710/110937706/110936166/110937716/110937731/110900204/110935737/110926788/110884568/110904629/110865666/110930898/novel.177/110918735/110936141	LOC110923710/LOC110937706/LOC110936166/LOC110937716/LOC110937731/LOC110900204/LOC110935737/LOC110926788/LOC110884568/LOC110904629/LOC110865666/LOC110930898/-/LOC110918735/LOC110936141	15
MF	GO:0030414	peptidase inhibitor activity	15/3309	30/16508	0.000233921	0.005843	110923710/110937706/110936166/110937716/110937731/110900204/110935737/110926788/110884568/110904629/110865666/110930898/novel.177/110918735/110936141	LOC110923710/LOC110937706/LOC110936166/LOC110937716/LOC110937731/LOC110900204/LOC110935737/LOC110926788/LOC110884568/LOC110904629/LOC110865666/LOC110930898/-/LOC110918735/LOC110936141	15
MF	GO:0061134	peptidase regulator activity	15/3309	30/16508	0.000233921	0.005843	110923710/110937706/110936166/110937716/110937731/110900204/110935737/110926788/110884568/110904629/110865666/110930898/novel.177/110918735/110936141	LOC110923710/LOC110937706/LOC110936166/LOC110937716/LOC110937731/LOC110900204/LOC110935737/LOC110926788/LOC110884568/LOC110904629/LOC110865666/LOC110930898/-/LOC110918735/LOC110936141	15
MF	GO:0061135	endopeptidase regulator activity	15/3309	30/16508	0.000233921	0.005843	110923710/110937706/110936166/110937716/110937731/110900204/110935737/110926788/110884568/110904629/110865666/110930898/novel.177/110918735/110936141	LOC110923710/LOC110937706/LOC110936166/LOC110937716/LOC110937731/LOC110900204/LOC110935737/LOC110926788/LOC110884568/LOC110904629/LOC110865666/LOC110930898/-/LOC110918735/LOC110936141	15
MF	GO:0004842	ubiquitin-protein transferase activity	34/3309	95/16508	0.000251989	0.005843	110895193/110904638/110872269/110898209/110877804/110900231/110891052/110912363/110868042/110868152/110894573/110942256/110895283/110943157/110878199/110935515/110873478/110939739/110887310/110908835/110918126/110917003/110938241/110894706/110904311/110925302/110910034/110887311/110912665/110927377/110940869/110937821/110869152/110905406	LOC110895193/LOC110904638/LOC110872269/LOC110898209/LOC110877804/LOC110900231/LOC110891052/LOC110912363/LOC110868042/LOC110868152/LOC110894573/LOC110942256/LOC110895283/LOC110943157/LOC110878199/LOC110935515/LOC110873478/LOC110939739/LOC110887310/LOC110908835/LOC110918126/LOC110917003/LOC110938241/LOC110894706/LOC110904311/LOC110925302/LOC110910034/LOC110887311/LOC110912665/LOC110927377/LOC110940…	34
MF	GO:0019787	ubiquitin-like protein transferase activity	34/3309	95/16508	0.000251989	0.005843	110895193/110904638/110872269/110898209/110877804/110900231/110891052/110912363/110868042/110868152/110894573/110942256/110895283/110943157/110878199/110935515/110873478/110939739/110887310/110908835/110918126/110917003/110938241/110894706/110904311/110925302/110910034/110887311/110912665/110927377/110940869/110937821/110869152/110905406	LOC110895193/LOC110904638/LOC110872269/LOC110898209/LOC110877804/LOC110900231/LOC110891052/LOC110912363/LOC110868042/LOC110868152/LOC110894573/LOC110942256/LOC110895283/LOC110943157/LOC110878199/LOC110935515/LOC110873478/LOC110939739/LOC110887310/LOC110908835/LOC110918126/LOC110917003/LOC110938241/LOC110894706/LOC110904311/LOC110925302/LOC110910034/LOC110887311/LOC110912665/LOC110927377/LOC110940…	34
MF	GO:0004185	serine-type carboxypeptidase activity	26/3309	67/16508	0.000307315	0.00635844	110921948/110918244/110940598/110889345/110893961/110889271/110912274/110865743/110912893/110915722/110927019/110912890/110938285/110874817/110879148/110870764/110904561/110898270/110912266/110942227/110942217/110886317/110929381/110939797/110921809/110911443	LOC110921948/LOC110918244/LOC110940598/LOC110889345/LOC110893961/LOC110889271/LOC110912274/LOC110865743/LOC110912893/LOC110915722/LOC110927019/LOC110912890/LOC110938285/LOC110874817/LOC110879148/LOC110870764/LOC110904561/LOC110898270/LOC110912266/LOC110942227/LOC110942217/LOC110886317/LOC110929381/LOC110939797/LOC110921809/LOC110911443	26
MF	GO:0020037	heme binding	118/3309	440/16508	0.000308496	0.00635844	110889481/110937398/110897342/110904359/110865034/110864775/110936264/110928786/110936214/110920845/110911674/110899627/110912022/110920974/110942325/110917534/110897599/110915221/110941291/110917404/110898092/110915787/110879855/110898325/110878688/110873528/110877170/110921448/110937722/110924461/110897775/110942231/110878527/110911035/110889338/110924631/110930307/110879526/110868163/110937721…	LOC110889481/LOC110937398/LOC110897342/LOC110904359/LOC110865034/LOC110864775/LOC110936264/LOC110928786/LOC110936214/LOC110920845/LOC110911674/LOC110899627/LOC110912022/LOC110920974/LOC110942325/LOC110917534/LOC110897599/LOC110915221/LOC110941291/LOC110917404/LOC110898092/LOC110915787/LOC110879855/LOC110898325/LOC110878688/LOC110873528/LOC110877170/LOC110921448/LOC110937722/LOC110924461/LOC110897…	118
BP	GO:0016567	protein ubiquitination	34/2272	82/10514	3.82554e-05	0.00793107	110895193/110904638/110872269/110898209/110877804/110900231/110891052/110912363/110868042/110868152/110894573/110942256/110895283/110943157/110878199/110935515/110873478/110939739/110887310/110908835/110918126/110917003/110938241/110894706/110904311/110925302/110910034/110887311/110912665/110927377/110940869/110937821/110869152/110905406	LOC110895193/LOC110904638/LOC110872269/LOC110898209/LOC110877804/LOC110900231/LOC110891052/LOC110912363/LOC110868042/LOC110868152/LOC110894573/LOC110942256/LOC110895283/LOC110943157/LOC110878199/LOC110935515/LOC110873478/LOC110939739/LOC110887310/LOC110908835/LOC110918126/LOC110917003/LOC110938241/LOC110894706/LOC110904311/LOC110925302/LOC110910034/LOC110887311/LOC110912665/LOC110927377/LOC110940…	34
BP	GO:0032446	protein modification by small protein conjugation	34/2272	83/10514	5.15005e-05	0.00793107	110895193/110904638/110872269/110898209/110877804/110900231/110891052/110912363/110868042/110868152/110894573/110942256/110895283/110943157/110878199/110935515/110873478/110939739/110887310/110908835/110918126/110917003/110938241/110894706/110904311/110925302/110910034/110887311/110912665/110927377/110940869/110937821/110869152/110905406	LOC110895193/LOC110904638/LOC110872269/LOC110898209/LOC110877804/LOC110900231/LOC110891052/LOC110912363/LOC110868042/LOC110868152/LOC110894573/LOC110942256/LOC110895283/LOC110943157/LOC110878199/LOC110935515/LOC110873478/LOC110939739/LOC110887310/LOC110908835/LOC110918126/LOC110917003/LOC110938241/LOC110894706/LOC110904311/LOC110925302/LOC110910034/LOC110887311/LOC110912665/LOC110927377/LOC110940…	34
MF	GO:0046906	tetrapyrrole binding	118/3309	443/16508	0.000410232	0.00801031	110889481/110937398/110897342/110904359/110865034/110864775/110936264/110928786/110936214/110920845/110911674/110899627/110912022/110920974/110942325/110917534/110897599/110915221/110941291/110917404/110898092/110915787/110879855/110898325/110878688/110873528/110877170/110921448/110937722/110924461/110897775/110942231/110878527/110911035/110889338/110924631/110930307/110879526/110868163/110937721…	LOC110889481/LOC110937398/LOC110897342/LOC110904359/LOC110865034/LOC110864775/LOC110936264/LOC110928786/LOC110936214/LOC110920845/LOC110911674/LOC110899627/LOC110912022/LOC110920974/LOC110942325/LOC110917534/LOC110897599/LOC110915221/LOC110941291/LOC110917404/LOC110898092/LOC110915787/LOC110879855/LOC110898325/LOC110878688/LOC110873528/LOC110877170/LOC110921448/LOC110937722/LOC110924461/LOC110897…	118
MF	GO:0070008	serine-type exopeptidase activity	27/3309	72/16508	0.000452912	0.00840151	110921948/110918244/110940598/110889345/110893961/110889271/110912274/110865743/110912893/110915722/110927019/110912890/110938285/110874817/110879148/110870764/110904561/110898270/110912266/110942227/110942217/110941004/110886317/110929381/110939797/110921809/110911443	LOC110921948/LOC110918244/LOC110940598/LOC110889345/LOC110893961/LOC110889271/LOC110912274/LOC110865743/LOC110912893/LOC110915722/LOC110927019/LOC110912890/LOC110938285/LOC110874817/LOC110879148/LOC110870764/LOC110904561/LOC110898270/LOC110912266/LOC110942227/LOC110942217/LOC110941004/LOC110886317/LOC110929381/LOC110939797/LOC110921809/LOC110911443	27
MF	GO:0004180	carboxypeptidase activity	26/3309	69/16508	0.000525744	0.00928814	110921948/110918244/110940598/110889345/110893961/110889271/110912274/110865743/110912893/110915722/110927019/110912890/110938285/110874817/110879148/110870764/110904561/110898270/110912266/110942227/110942217/110886317/110929381/110939797/110921809/110911443	LOC110921948/LOC110918244/LOC110940598/LOC110889345/LOC110893961/LOC110889271/LOC110912274/LOC110865743/LOC110912893/LOC110915722/LOC110927019/LOC110912890/LOC110938285/LOC110874817/LOC110879148/LOC110870764/LOC110904561/LOC110898270/LOC110912266/LOC110942227/LOC110942217/LOC110886317/LOC110929381/LOC110939797/LOC110921809/LOC110911443	26
CC	GO:0009522	photosystem I	11/665	22/3553	0.00085902	0.011382	110911785/110936478/110925655/110873548/110894815/110899054/110942165/110930236/110884480/110889561/110894458	LOC110911785/LOC110936478/LOC110925655/LOC110873548/LOC110894815/LOC110899054/LOC110942165/LOC110930236/LOC110884480/LOC110889561/LOC110894458	11
MF	GO:0005506	iron ion binding	102/3309	385/16508	0.00118191	0.0199313	110864941/110936772/110889481/110937398/110897342/110904359/110865034/110864775/110928786/110936214/110920845/110911674/110899627/110912022/110920974/110940683/110917534/110897599/110915221/110897539/110898092/110915787/110879855/110898325/110873528/110877170/110921448/110937722/110924461/110897775/110942231/110911035/110889338/110930307/110879526/110868163/110937721/110894182/110904870/110920962…	LOC110864941/LOC110936772/LOC110889481/LOC110937398/LOC110897342/LOC110904359/LOC110865034/LOC110864775/LOC110928786/LOC110936214/LOC110920845/LOC110911674/LOC110899627/LOC110912022/LOC110920974/LOC110940683/LOC110917534/LOC110897599/LOC110915221/LOC110897539/LOC110898092/LOC110915787/LOC110879855/LOC110898325/LOC110873528/LOC110877170/LOC110921448/LOC110937722/LOC110924461/LOC110897775/LOC110942…	102
CC	GO:0009523	photosystem II	14/665	34/3553	0.00192269	0.022645	110877033/110884044/110928439/110865283/110935819/110879131/110873544/110865288/110944637/110868758/110890423/110864906/110921533/110877741	LOC110877033/LOC110884044/LOC110928439/LOC110865283/LOC110935819/LOC110879131/LOC110873544/LOC110865288/LOC110944637/LOC110868758/LOC110890423/LOC110864906/LOC110921533/LOC110877741	14
MF	GO:0030599	pectinesterase activity	18/3309	45/16508	0.00167004	0.0269384	110869237/110942421/110935912/110893680/110940246/110900061/110900062/110894160/110911940/110880309/110865760/110880308/110886930/110884283/110873111/110935442/110894418/110931108	LOC110869237/LOC110942421/LOC110935912/LOC110893680/LOC110940246/LOC110900061/LOC110900062/LOC110894160/LOC110911940/LOC110880309/LOC110865760/LOC110880308/LOC110886930/LOC110884283/LOC110873111/LOC110935442/LOC110894418/LOC110931108	18
MF	GO:0008238	exopeptidase activity	29/3309	86/16508	0.00201992	0.0312246	110921948/110918244/110940598/110889345/110893961/110889271/110912274/110865743/110912893/110915722/110927019/110912890/110938285/110874817/110879148/110870764/110904561/110898270/110912266/110942227/110942217/110941004/110886317/novel.3030/110892372/110929381/110939797/110921809/110911443	LOC110921948/LOC110918244/LOC110940598/LOC110889345/LOC110893961/LOC110889271/LOC110912274/LOC110865743/LOC110912893/LOC110915722/LOC110927019/LOC110912890/LOC110938285/LOC110874817/LOC110879148/LOC110870764/LOC110904561/LOC110898270/LOC110912266/LOC110942227/LOC110942217/LOC110941004/LOC110886317/-/LOC110892372/LOC110929381/LOC110939797/LOC110921809/LOC110911443	29
MF	GO:0008374	O-acyltransferase activity	13/3309	29/16508	0.00217976	0.0323476	110865789/110885651/110938238/110909079/110890001/110918434/110883866/110864135/110893733/110878610/110912329/110904203/110893689	LOC110865789/LOC110885651/LOC110938238/LOC110909079/LOC110890001/LOC110918434/LOC110883866/LOC110864135/LOC110893733/LOC110878610/LOC110912329/LOC110904203/LOC110893689	13
CC	GO:0009507	chloroplast	6/665	10/3553	0.00444766	0.0428593	110911893/110884044/110889417/110865283/110865288/110898842	LOC110911893/LOC110884044/LOC110889417/LOC110865283/LOC110865288/LOC110898842	6
CC	GO:0009536	plastid	6/665	10/3553	0.00444766	0.0428593	110911893/110884044/110889417/110865283/110865288/110898842	LOC110911893/LOC110884044/LOC110889417/LOC110865283/LOC110865288/LOC110898842	6
L1 VS L0 down
Category	GO ID	Description	Gene Ratio	Bg Ratio	pvalue	padj	Gene ID	Gene Name	Count
MF	GO:0005198	structural molecule activity	210/2723	355/16508	9.84565e-76	3.57397e-73	110884024/110911597/110905027/110883846/110894164/110889794/110874680/110873629/110940663/110895862/110909340/110937790/110912683/110912800/110895454/110915921/110891522/110868207/110899878/110889062/110871567/110910897/110899735/110896046/110936525/110864948/110873063/110937522/110868797/110918774/110904718/110877062/110879625/110870624/110895947/110884280/110916515/110900222/110940241/110938239…	LOC110884024/LOC110911597/LOC110905027/LOC110883846/LOC110894164/LOC110889794/LOC110874680/LOC110873629/LOC110940663/LOC110895862/LOC110909340/LOC110937790/LOC110912683/LOC110912800/LOC110895454/LOC110915921/LOC110891522/LOC110868207/LOC110899878/LOC110889062/LOC110871567/LOC110910897/LOC110899735/LOC110896046/LOC110936525/LOC110864948/LOC110873063/LOC110937522/LOC110868797/LOC110918774/LOC110904…	210
MF	GO:0003735	structural constituent of ribosome	201/2723	332/16508	5.6247e-75	1.02088e-72	110884024/110911597/110905027/110883846/110894164/110889794/110874680/110873629/110940663/110895862/110909340/110937790/110912683/110912800/110895454/110915921/110891522/110868207/110899878/110889062/110871567/110910897/110899735/110896046/110936525/110864948/110873063/110937522/110868797/110918774/110904718/110877062/110879625/110870624/110895947/110884280/110916515/110900222/110940241/110938239…	LOC110884024/LOC110911597/LOC110905027/LOC110883846/LOC110894164/LOC110889794/LOC110874680/LOC110873629/LOC110940663/LOC110895862/LOC110909340/LOC110937790/LOC110912683/LOC110912800/LOC110895454/LOC110915921/LOC110891522/LOC110868207/LOC110899878/LOC110889062/LOC110871567/LOC110910897/LOC110899735/LOC110896046/LOC110936525/LOC110864948/LOC110873063/LOC110937522/LOC110868797/LOC110918774/LOC110904…	201
BP	GO:0006412	translation	240/1826	453/10514	3.72509e-70	1.20186e-67	110920890/110920796/110884024/110911597/110886001/110905027/110916994/110884133/110883846/110894164/110889794/110874680/110864308/110873629/110940663/110895862/110909340/110937790/110885778/110912683/110912800/110895454/110890364/110915921/110891522/110906664/110885476/110868207/110899878/110889062/110871567/110910897/110899735/110896046/110936525/110864948/110873063/110937522/110868797/110918774…	LOC110920890/LOC110920796/LOC110884024/LOC110911597/LOC110886001/LOC110905027/LOC110916994/LOC110884133/LOC110883846/LOC110894164/LOC110889794/LOC110874680/LOC110864308/LOC110873629/LOC110940663/LOC110895862/LOC110909340/LOC110937790/LOC110885778/LOC110912683/LOC110912800/LOC110895454/LOC110890364/LOC110915921/LOC110891522/LOC110906664/LOC110885476/LOC110868207/LOC110899878/LOC110889062/LOC110871…	240
BP	GO:0043604	amide biosynthetic process	246/1826	472/10514	4.6404e-70	1.20186e-67	110920890/110890891/110920796/110884024/110911597/110886001/110905027/110916994/110884133/110883846/110894164/110889794/110874680/110864308/110873629/110940663/110895862/110909340/110937790/110885778/110912683/110912800/110895454/110890364/110915921/110891522/110906664/110885476/110868207/110899878/110889062/110871567/110884250/110910897/110899735/110896046/110936525/110864948/110873063/110937522…	LOC110920890/LOC110890891/LOC110920796/LOC110884024/LOC110911597/LOC110886001/LOC110905027/LOC110916994/LOC110884133/LOC110883846/LOC110894164/LOC110889794/LOC110874680/LOC110864308/LOC110873629/LOC110940663/LOC110895862/LOC110909340/LOC110937790/LOC110885778/LOC110912683/LOC110912800/LOC110895454/LOC110890364/LOC110915921/LOC110891522/LOC110906664/LOC110885476/LOC110868207/LOC110899878/LOC110889…	246
BP	GO:0043043	peptide biosynthetic process	240/1826	458/10514	6.65595e-69	1.14926e-66	110920890/110920796/110884024/110911597/110886001/110905027/110916994/110884133/110883846/110894164/110889794/110874680/110864308/110873629/110940663/110895862/110909340/110937790/110885778/110912683/110912800/110895454/110890364/110915921/110891522/110906664/110885476/110868207/110899878/110889062/110871567/110910897/110899735/110896046/110936525/110864948/110873063/110937522/110868797/110918774…	LOC110920890/LOC110920796/LOC110884024/LOC110911597/LOC110886001/LOC110905027/LOC110916994/LOC110884133/LOC110883846/LOC110894164/LOC110889794/LOC110874680/LOC110864308/LOC110873629/LOC110940663/LOC110895862/LOC110909340/LOC110937790/LOC110885778/LOC110912683/LOC110912800/LOC110895454/LOC110890364/LOC110915921/LOC110891522/LOC110906664/LOC110885476/LOC110868207/LOC110899878/LOC110889062/LOC110871…	240
BP	GO:0043603	cellular amide metabolic process	248/1826	486/10514	3.30769e-68	4.28346e-66	110920890/110890891/110920796/110884024/110911597/110886001/110905027/110916994/110884133/110883846/110894164/110889794/110874680/110864308/110873629/110940663/110895862/110909340/110937790/110885778/110912683/110912800/110895454/110890364/110915921/110891522/110906664/110885476/110868207/110899878/110889062/110871567/110884250/110910897/110899735/110896046/110936525/110864948/110873063/110937522…	LOC110920890/LOC110890891/LOC110920796/LOC110884024/LOC110911597/LOC110886001/LOC110905027/LOC110916994/LOC110884133/LOC110883846/LOC110894164/LOC110889794/LOC110874680/LOC110864308/LOC110873629/LOC110940663/LOC110895862/LOC110909340/LOC110937790/LOC110885778/LOC110912683/LOC110912800/LOC110895454/LOC110890364/LOC110915921/LOC110891522/LOC110906664/LOC110885476/LOC110868207/LOC110899878/LOC110889…	248
BP	GO:0006518	peptide metabolic process	241/1826	466/10514	1.03848e-67	1.07586e-65	110920890/110920796/110884024/110911597/110886001/110905027/110916994/110884133/110883846/110894164/110889794/110874680/110864308/110873629/110940663/110895862/110909340/110937790/110885778/110912683/110912800/110895454/110890364/110915921/110891522/110906664/110885476/110868207/110899878/110889062/110871567/110910897/110899735/110896046/110936525/110864948/110873063/110937522/110868797/110918774…	LOC110920890/LOC110920796/LOC110884024/LOC110911597/LOC110886001/LOC110905027/LOC110916994/LOC110884133/LOC110883846/LOC110894164/LOC110889794/LOC110874680/LOC110864308/LOC110873629/LOC110940663/LOC110895862/LOC110909340/LOC110937790/LOC110885778/LOC110912683/LOC110912800/LOC110895454/LOC110890364/LOC110915921/LOC110891522/LOC110906664/LOC110885476/LOC110868207/LOC110899878/LOC110889062/LOC110871…	241
CC	GO:0005840	ribosome	199/757	327/3553	6.74882e-61	8.90845e-59	110884024/110911597/110905027/110883846/110894164/110889794/110874680/110873629/110940663/110895862/110909340/110937790/110912683/110912800/110895454/110915921/110891522/110868207/110899878/110889062/110871567/110910897/110899735/110896046/110936525/110864948/110873063/110937522/110868797/110918774/110904718/110877062/110879625/110870624/110895947/110884280/110916515/110900222/110940241/110938239…	LOC110884024/LOC110911597/LOC110905027/LOC110883846/LOC110894164/LOC110889794/LOC110874680/LOC110873629/LOC110940663/LOC110895862/LOC110909340/LOC110937790/LOC110912683/LOC110912800/LOC110895454/LOC110915921/LOC110891522/LOC110868207/LOC110899878/LOC110889062/LOC110871567/LOC110910897/LOC110899735/LOC110896046/LOC110936525/LOC110864948/LOC110873063/LOC110937522/LOC110868797/LOC110918774/LOC110904…	199
CC	GO:1990904	ribonucleoprotein complex	208/757	360/3553	2.40574e-58	1.58779e-56	110884024/110911597/110866000/110905027/110883846/110894164/110889794/110874680/110873629/110909797/110940663/110895862/110909340/110937790/110912683/110912800/110895454/110915921/110891522/110868207/110899878/110889062/110871567/110910897/110899735/110896046/110936525/110864948/110873063/110937522/110868797/110918774/110904718/110877062/110879625/110870624/110895947/110884280/110916515/110900222…	LOC110884024/LOC110911597/LOC110866000/LOC110905027/LOC110883846/LOC110894164/LOC110889794/LOC110874680/LOC110873629/LOC110909797/LOC110940663/LOC110895862/LOC110909340/LOC110937790/LOC110912683/LOC110912800/LOC110895454/LOC110915921/LOC110891522/LOC110868207/LOC110899878/LOC110889062/LOC110871567/LOC110910897/LOC110899735/LOC110896046/LOC110936525/LOC110864948/LOC110873063/LOC110937522/LOC110868…	208
CC	GO:0043228	non-membrane-bounded organelle	213/757	448/3553	7.19441e-41	2.37416e-39	110884024/110911597/110905027/110883846/110894164/110889794/110874680/110873629/110909797/110940663/110895862/110909340/110937012/110937790/110912683/110912800/110895454/110915921/110891522/110868207/110899878/110889062/110871567/110910897/110899735/110890107/110896046/110936525/110864948/110873063/110937522/110868797/110918774/110904718/110877062/110879625/110870624/110895947/110884280/110916515…	LOC110884024/LOC110911597/LOC110905027/LOC110883846/LOC110894164/LOC110889794/LOC110874680/LOC110873629/LOC110909797/LOC110940663/LOC110895862/LOC110909340/LOC110937012/LOC110937790/LOC110912683/LOC110912800/LOC110895454/LOC110915921/LOC110891522/LOC110868207/LOC110899878/LOC110889062/LOC110871567/LOC110910897/LOC110899735/LOC110890107/LOC110896046/LOC110936525/LOC110864948/LOC110873063/LOC110937…	213
CC	GO:0043232	intracellular non-membrane-bounded organelle	213/757	448/3553	7.19441e-41	2.37416e-39	110884024/110911597/110905027/110883846/110894164/110889794/110874680/110873629/110909797/110940663/110895862/110909340/110937012/110937790/110912683/110912800/110895454/110915921/110891522/110868207/110899878/110889062/110871567/110910897/110899735/110890107/110896046/110936525/110864948/110873063/110937522/110868797/110918774/110904718/110877062/110879625/110870624/110895947/110884280/110916515…	LOC110884024/LOC110911597/LOC110905027/LOC110883846/LOC110894164/LOC110889794/LOC110874680/LOC110873629/LOC110909797/LOC110940663/LOC110895862/LOC110909340/LOC110937012/LOC110937790/LOC110912683/LOC110912800/LOC110895454/LOC110915921/LOC110891522/LOC110868207/LOC110899878/LOC110889062/LOC110871567/LOC110910897/LOC110899735/LOC110890107/LOC110896046/LOC110936525/LOC110864948/LOC110873063/LOC110937…	213
MF	GO:0003723	RNA binding	131/2723	371/16508	4.56719e-19	5.5263e-17	110884986/110920796/110911597/110895793/110916994/110921081/110864308/110885778/110877107/110909884/110891522/110908930/110885476/110869437/110898016/110873805/110904262/110908314/110918774/110884280/110941192/110873449/110904091/110936616/110890420/110864922/110930710/110910268/110878543/110930401/110935600/110871856/110879900/110926286/110912806/110911168/110910295/110926443/110941204/110915499…	LOC110884986/LOC110920796/LOC110911597/LOC110895793/LOC110916994/LOC110921081/LOC110864308/LOC110885778/LOC110877107/LOC110909884/LOC110891522/LOC110908930/LOC110885476/LOC110869437/LOC110898016/LOC110873805/LOC110904262/LOC110908314/LOC110918774/LOC110884280/LOC110941192/LOC110873449/LOC110904091/LOC110936616/LOC110890420/LOC110864922/LOC110930710/LOC110910268/LOC110878543/LOC110930401/LOC110935…	131
BP	GO:0042254	ribosome biogenesis	31/1826	55/10514	7.0479e-11	6.08469e-09	110921620/110866000/110909797/110937012/110895421/110867719/110898016/110890107/110865687/110872308/110898296/110925898/110912806/110908027/110904486/110904420/110937481/110928943/110867716/110876990/110895539/110869094/110909001/110937141/110921574/110890958/110912356/110878119/110905144/110869719/110936648	LOC110921620/LOC110866000/LOC110909797/LOC110937012/LOC110895421/LOC110867719/LOC110898016/LOC110890107/LOC110865687/LOC110872308/LOC110898296/LOC110925898/LOC110912806/LOC110908027/LOC110904486/LOC110904420/LOC110937481/LOC110928943/LOC110867716/LOC110876990/LOC110895539/LOC110869094/LOC110909001/LOC110937141/LOC110921574/LOC110890958/LOC110912356/LOC110878119/LOC110905144/LOC110869719/LOC110936…	31
BP	GO:0022613	ribonucleoprotein complex biogenesis	31/1826	59/10514	7.60448e-10	5.62732e-08	110921620/110866000/110909797/110937012/110895421/110867719/110898016/110890107/110865687/110872308/110898296/110925898/110912806/110908027/110904486/110904420/110937481/110928943/110867716/110876990/110895539/110869094/110909001/110937141/110921574/110890958/110912356/110878119/110905144/110869719/110936648	LOC110921620/LOC110866000/LOC110909797/LOC110937012/LOC110895421/LOC110867719/LOC110898016/LOC110890107/LOC110865687/LOC110872308/LOC110898296/LOC110925898/LOC110912806/LOC110908027/LOC110904486/LOC110904420/LOC110937481/LOC110928943/LOC110867716/LOC110876990/LOC110895539/LOC110869094/LOC110909001/LOC110937141/LOC110921574/LOC110890958/LOC110912356/LOC110878119/LOC110905144/LOC110869719/LOC110936…	31
MF	GO:0008135	translation factor activity, RNA binding	29/2723	70/16508	6.39793e-07	5.80612e-05	110920796/110916994/110864308/110885778/110885476/110873805/110908314/110930710/110878543/110935600/110879900/110915499/110908505/110873367/110915453/110944353/110922131/110899864/110918518/110930712/110873135/110895078/110885444/110876687/110886920/110926196/110937380/110915257/110886254	LOC110920796/LOC110916994/LOC110864308/LOC110885778/LOC110885476/LOC110873805/LOC110908314/LOC110930710/LOC110878543/LOC110935600/LOC110879900/LOC110915499/LOC110908505/LOC110873367/LOC110915453/LOC110944353/LOC110922131/LOC110899864/LOC110918518/LOC110930712/LOC110873135/LOC110895078/LOC110885444/LOC110876687/LOC110886920/LOC110926196/LOC110937380/LOC110915257/LOC110886254	29
BP	GO:0006082	organic acid metabolic process	99/1826	372/10514	3.70772e-06	0.000240075	110920890/110890891/110919696/110922047/110937127/110890752/110937588/110891332/110883802/110882039/110872125/110942378/110886001/110865084/110911750/110916150/110884133/110873277/110925931/110904216/110868287/110890364/110906664/110884250/110868707/110910537/110928848/110864809/110930517/110911552/110904982/110942177/110898236/110899323/110865716/110935992/110879516/110913018/110917085/110912883…	LOC110920890/LOC110890891/LOC110919696/LOC110922047/LOC110937127/LOC110890752/LOC110937588/LOC110891332/LOC110883802/LOC110882039/LOC110872125/LOC110942378/LOC110886001/LOC110865084/LOC110911750/LOC110916150/LOC110884133/LOC110873277/LOC110925931/LOC110904216/LOC110868287/LOC110890364/LOC110906664/LOC110884250/LOC110868707/LOC110910537/LOC110928848/LOC110864809/LOC110930517/LOC110911552/LOC110904…	99
BP	GO:0019752	carboxylic acid metabolic process	97/1826	365/10514	4.95849e-06	0.000268241	110920890/110890891/110919696/110922047/110890752/110937588/110891332/110883802/110882039/110872125/110942378/110886001/110865084/110911750/110916150/110884133/110873277/110925931/110904216/110868287/110890364/110906664/110884250/110868707/110910537/110928848/110864809/110930517/110911552/110904982/110942177/110898236/110899323/110865716/110935992/110879516/110913018/110917085/110912883/110937667…	LOC110920890/LOC110890891/LOC110919696/LOC110922047/LOC110890752/LOC110937588/LOC110891332/LOC110883802/LOC110882039/LOC110872125/LOC110942378/LOC110886001/LOC110865084/LOC110911750/LOC110916150/LOC110884133/LOC110873277/LOC110925931/LOC110904216/LOC110868287/LOC110890364/LOC110906664/LOC110884250/LOC110868707/LOC110910537/LOC110928848/LOC110864809/LOC110930517/LOC110911552/LOC110904982/LOC110942…	97
BP	GO:0043436	oxoacid metabolic process	98/1826	370/10514	5.1784e-06	0.000268241	110920890/110890891/110919696/110922047/110890752/110937588/110891332/110883802/110882039/110872125/110942378/110886001/110865084/110911750/110916150/110884133/110873277/110925931/110904216/110868287/110890364/110906664/110884250/110868707/110910537/110928848/110864809/110930517/110911552/110904982/110942177/110898236/110899323/110865716/110935992/110879516/110913018/110917085/110912883/110937667…	LOC110920890/LOC110890891/LOC110919696/LOC110922047/LOC110890752/LOC110937588/LOC110891332/LOC110883802/LOC110882039/LOC110872125/LOC110942378/LOC110886001/LOC110865084/LOC110911750/LOC110916150/LOC110884133/LOC110873277/LOC110925931/LOC110904216/LOC110868287/LOC110890364/LOC110906664/LOC110884250/LOC110868707/LOC110910537/LOC110928848/LOC110864809/LOC110930517/LOC110911552/LOC110904982/LOC110942…	98
MF	GO:0019843	rRNA binding	12/2723	19/16508	6.35789e-06	0.000461583	110895793/110891522/110918774/110884280/110941192/110926286/110926443/110920856/110911451/110912484/110886646/110922961	LOC110895793/LOC110891522/LOC110918774/LOC110884280/LOC110941192/LOC110926286/LOC110926443/LOC110920856/LOC110911451/LOC110912484/LOC110886646/LOC110922961	12
BP	GO:0044085	cellular component biogenesis	51/1826	164/10514	1.06044e-05	0.000499369	110921620/110866000/110941835/110909797/110937012/110895421/110867719/110873705/110898016/110890107/110894203/110865687/110872308/110898296/110868905/110925898/110925165/110912806/110908027/110884272/110916085/110920965/110904486/110944547/110904420/110937481/110928943/110867716/110876990/110895539/110885074/110869094/110909001/110897882/110937141/110921574/110899586/110896187/110915949/110890958…	LOC110921620/LOC110866000/LOC110941835/LOC110909797/LOC110937012/LOC110895421/LOC110867719/LOC110873705/LOC110898016/LOC110890107/LOC110894203/LOC110865687/LOC110872308/LOC110898296/LOC110868905/LOC110925898/LOC110925165/LOC110912806/LOC110908027/LOC110884272/LOC110916085/LOC110920965/LOC110904486/LOC110944547/LOC110904420/LOC110937481/LOC110928943/LOC110867716/LOC110876990/LOC110895539/LOC110885…	51
BP	GO:0042278	purine nucleoside metabolic process	11/1826	17/10514	1.8663e-05	0.00069053	110910056/110897855/110942324/110873594/110890832/110905172/110880271/110864408/110873800/110921418/110935487	LOC110910056/LOC110897855/LOC110942324/LOC110873594/LOC110890832/LOC110905172/LOC110880271/LOC110864408/LOC110873800/LOC110921418/LOC110935487	11
BP	GO:0046128	purine ribonucleoside metabolic process	11/1826	17/10514	1.8663e-05	0.00069053	110910056/110897855/110942324/110873594/110890832/110905172/110880271/110864408/110873800/110921418/110935487	LOC110910056/LOC110897855/LOC110942324/LOC110873594/LOC110890832/LOC110905172/LOC110880271/LOC110864408/LOC110873800/LOC110921418/LOC110935487	11
BP	GO:1901068	guanosine-containing compound metabolic process	11/1826	17/10514	1.8663e-05	0.00069053	110910056/110897855/110942324/110873594/110890832/110905172/110880271/110864408/110873800/110921418/110935487	LOC110910056/LOC110897855/LOC110942324/LOC110873594/LOC110890832/LOC110905172/LOC110880271/LOC110864408/LOC110873800/LOC110921418/LOC110935487	11
BP	GO:0009108	coenzyme biosynthetic process	36/1826	105/10514	2.03333e-05	0.000702177	110890891/110895845/110941174/110879833/110891332/110882039/110916150/110925931/110874405/110910129/110865490/110884250/110880108/110930517/110911552/110942177/110865716/110935992/110879516/110868285/110912883/110864837/110937667/110912366/110882734/110895339/110878813/110865068/110909022/110867753/110908654/110929796/110936742/110899468/110911954/110869292	LOC110890891/LOC110895845/LOC110941174/LOC110879833/LOC110891332/LOC110882039/LOC110916150/LOC110925931/LOC110874405/LOC110910129/LOC110865490/LOC110884250/LOC110880108/LOC110930517/LOC110911552/LOC110942177/LOC110865716/LOC110935992/LOC110879516/LOC110868285/LOC110912883/LOC110864837/LOC110937667/LOC110912366/LOC110882734/LOC110895339/LOC110878813/LOC110865068/LOC110909022/LOC110867753/LOC110908…	36
MF	GO:0008237	metallopeptidase activity	25/2723	66/16508	2.41847e-05	0.00146318	110908056/110920947/110865979/110926421/110872721/110921620/110920608/110911045/110867937/110899584/110897727/110895374/110899516/110898244/110929813/110904426/110865547/110865669/110940295/110905163/110895268/110908850/110903771/110930512/110917177	LOC110908056/LOC110920947/LOC110865979/LOC110926421/LOC110872721/LOC110921620/LOC110920608/LOC110911045/LOC110867937/LOC110899584/LOC110897727/LOC110895374/LOC110899516/LOC110898244/LOC110929813/LOC110904426/LOC110865547/LOC110865669/LOC110940295/LOC110905163/LOC110895268/LOC110908850/LOC110903771/LOC110930512/LOC110917177	25
BP	GO:0051188	cofactor biosynthetic process	39/1826	122/10514	5.71003e-05	0.00184862	110890891/110895845/110941174/110879833/110891332/110882039/110916150/110925931/110874405/110910129/110865490/110884250/110890086/110880108/110930517/110911552/110942177/110865716/110935992/110879516/110868285/110912883/110864837/110937667/110937053/110912366/110882734/110895339/110878813/110865068/110930825/110909022/110867753/110908654/110929796/110936742/110899468/110911954/110869292	LOC110890891/LOC110895845/LOC110941174/LOC110879833/LOC110891332/LOC110882039/LOC110916150/LOC110925931/LOC110874405/LOC110910129/LOC110865490/LOC110884250/LOC110890086/LOC110880108/LOC110930517/LOC110911552/LOC110942177/LOC110865716/LOC110935992/LOC110879516/LOC110868285/LOC110912883/LOC110864837/LOC110937667/LOC110937053/LOC110912366/LOC110882734/LOC110895339/LOC110878813/LOC110865068/LOC110930…	39
BP	GO:0051186	cofactor metabolic process	48/1826	161/10514	6.34745e-05	0.00193411	110890891/110895845/110941174/110879833/110891332/110882039/110868740/110916150/110925931/110874405/110910129/110865490/110884250/110890086/110880108/110930517/110911552/110942177/110865716/110935992/110879516/110868905/110868285/110884272/110912883/110864837/110937667/110944547/110937053/110885074/110912366/110882734/110915949/110895339/110878813/110864535/110865068/110871961/110920573/110930825…	LOC110890891/LOC110895845/LOC110941174/LOC110879833/LOC110891332/LOC110882039/LOC110868740/LOC110916150/LOC110925931/LOC110874405/LOC110910129/LOC110865490/LOC110884250/LOC110890086/LOC110880108/LOC110930517/LOC110911552/LOC110942177/LOC110865716/LOC110935992/LOC110879516/LOC110868905/LOC110868285/LOC110884272/LOC110912883/LOC110864837/LOC110937667/LOC110944547/LOC110937053/LOC110885074/LOC110912…	48
BP	GO:0006364	rRNA processing	13/1826	25/10514	8.16317e-05	0.00222554	110921620/110866000/110909797/110895421/110867719/110898016/110890107/110912806/110904486/110937481/110937141/110912356/110878119	LOC110921620/LOC110866000/LOC110909797/LOC110895421/LOC110867719/LOC110898016/LOC110890107/LOC110912806/LOC110904486/LOC110937481/LOC110937141/LOC110912356/LOC110878119	13
BP	GO:0016072	rRNA metabolic process	13/1826	25/10514	8.16317e-05	0.00222554	110921620/110866000/110909797/110895421/110867719/110898016/110890107/110912806/110904486/110937481/110937141/110912356/110878119	LOC110921620/LOC110866000/LOC110909797/LOC110895421/LOC110867719/LOC110898016/LOC110890107/LOC110912806/LOC110904486/LOC110937481/LOC110937141/LOC110912356/LOC110878119	13
BP	GO:0006520	cellular amino acid metabolic process	51/1826	176/10514	8.60905e-05	0.00222974	110920890/110919696/110922047/110937588/110883802/110942378/110886001/110865084/110884133/110873277/110904216/110890364/110906664/110928848/110864809/110898236/110899323/110913018/110926857/110873604/110877764/110941478/110941716/110898235/110873272/110877928/110929323/110941290/110868496/110909005/110890719/110930199/110929779/110895011/110873597/110921564/110879634/110912340/110877480/110930071…	LOC110920890/LOC110919696/LOC110922047/LOC110937588/LOC110883802/LOC110942378/LOC110886001/LOC110865084/LOC110884133/LOC110873277/LOC110904216/LOC110890364/LOC110906664/LOC110928848/LOC110864809/LOC110898236/LOC110899323/LOC110913018/LOC110926857/LOC110873604/LOC110877764/LOC110941478/LOC110941716/LOC110898235/LOC110873272/LOC110877928/LOC110929323/LOC110941290/LOC110868496/LOC110909005/LOC110890…	51
BP	GO:0006790	sulfur compound metabolic process	20/1826	49/10514	9.31066e-05	0.00229663	110941174/110937588/110873277/110910129/110897428/110864809/110898236/110868905/110868285/110884272/110944547/110898235/110885074/110915097/110868496/110915949/110864535/110929779/110920573/110904332	LOC110941174/LOC110937588/LOC110873277/LOC110910129/LOC110897428/LOC110864809/LOC110898236/LOC110868905/LOC110868285/LOC110884272/LOC110944547/LOC110898235/LOC110885074/LOC110915097/LOC110868496/LOC110915949/LOC110864535/LOC110929779/LOC110920573/LOC110904332	20
MF	GO:0004222	metalloendopeptidase activity	22/2723	57/16508	5.249e-05	0.00272198	110908056/110920947/110865979/110926421/110872721/110921620/110920608/110911045/110867937/110897727/110895374/110899516/110898244/110929813/110904426/110865547/110940295/110905163/110895268/110908850/110903771/110917177	LOC110908056/LOC110920947/LOC110865979/LOC110926421/LOC110872721/LOC110921620/LOC110920608/LOC110911045/LOC110867937/LOC110897727/LOC110895374/LOC110899516/LOC110898244/LOC110929813/LOC110904426/LOC110865547/LOC110940295/LOC110905163/LOC110895268/LOC110908850/LOC110903771/LOC110917177	22
BP	GO:0034660	ncRNA metabolic process	43/1826	143/10514	0.000120855	0.00284559	110920890/110886001/110921620/110866000/110884133/110909797/110895421/110890364/110867719/110906664/110898016/110904262/110890107/110912806/110880173/110904486/110877764/110937481/110908169/110929323/110937141/110873870/110890719/110930199/110895011/110912356/110931017/110897474/110921564/110879634/110912340/110877480/110878322/110890326/110868906/110878119/110908720/110929145/110895577/110877102…	LOC110920890/LOC110886001/LOC110921620/LOC110866000/LOC110884133/LOC110909797/LOC110895421/LOC110890364/LOC110867719/LOC110906664/LOC110898016/LOC110904262/LOC110890107/LOC110912806/LOC110880173/LOC110904486/LOC110877764/LOC110937481/LOC110908169/LOC110929323/LOC110937141/LOC110873870/LOC110890719/LOC110930199/LOC110895011/LOC110912356/LOC110931017/LOC110897474/LOC110921564/LOC110879634/LOC110912…	43
BP	GO:0006732	coenzyme metabolic process	38/1826	123/10514	0.000158465	0.00356891	110890891/110895845/110941174/110879833/110891332/110882039/110868740/110916150/110925931/110874405/110910129/110865490/110884250/110880108/110930517/110911552/110942177/110865716/110935992/110879516/110868285/110912883/110864837/110937667/110912366/110882734/110895339/110878813/110865068/110871961/110909022/110867753/110908654/110929796/110936742/110899468/110911954/110869292	LOC110890891/LOC110895845/LOC110941174/LOC110879833/LOC110891332/LOC110882039/LOC110868740/LOC110916150/LOC110925931/LOC110874405/LOC110910129/LOC110865490/LOC110884250/LOC110880108/LOC110930517/LOC110911552/LOC110942177/LOC110865716/LOC110935992/LOC110879516/LOC110868285/LOC110912883/LOC110864837/LOC110937667/LOC110912366/LOC110882734/LOC110895339/LOC110878813/LOC110865068/LOC110871961/LOC110909…	38
BP	GO:0019637	organophosphate metabolic process	69/1826	263/10514	0.000171327	0.00369781	110895845/110910056/110879833/110891332/110882039/110930253/110868740/110916150/110897855/110925931/110929354/110874405/110910129/110919889/110865490/110880108/110930517/110911552/110942324/110904982/110942177/110865716/110936997/110935992/110872003/110879516/110873594/110912883/110923354/110864837/110890832/110904915/110893776/110905172/110942232/110872496/110880271/110864408/110878373/110904985…	LOC110895845/LOC110910056/LOC110879833/LOC110891332/LOC110882039/LOC110930253/LOC110868740/LOC110916150/LOC110897855/LOC110925931/LOC110929354/LOC110874405/LOC110910129/LOC110919889/LOC110865490/LOC110880108/LOC110930517/LOC110911552/LOC110942324/LOC110904982/LOC110942177/LOC110865716/LOC110936997/LOC110935992/LOC110872003/LOC110879516/LOC110873594/LOC110912883/LOC110923354/LOC110864837/LOC110890…	69
MF	GO:0051087	chaperone binding	12/2723	23/16508	8.89394e-05	0.00403562	110898983/110907519/110907527/110884815/110864506/110868248/110929712/110912175/110938002/110873266/110898766/110916533	LOC110898983/LOC110907519/LOC110907527/LOC110884815/LOC110864506/LOC110868248/LOC110929712/LOC110912175/LOC110938002/LOC110873266/LOC110898766/LOC110916533	12
BP	GO:0009451	RNA modification	18/1826	44/10514	0.000199908	0.0041421	110872308/110904037/110908169/110869094/110909001/110918821/110916232/110904637/110912356/110879425/110878322/110929236/110941028/110877102/110877879/110886359/110937317/110897818	LOC110872308/LOC110904037/LOC110908169/LOC110869094/LOC110909001/LOC110918821/LOC110916232/LOC110904637/LOC110912356/LOC110879425/LOC110878322/LOC110929236/LOC110941028/LOC110877102/LOC110877879/LOC110886359/LOC110937317/LOC110897818	18
BP	GO:0009119	ribonucleoside metabolic process	11/1826	21/10514	0.00026886	0.00533298	110910056/110897855/110942324/110873594/110890832/110905172/110880271/110864408/110873800/110921418/110935487	LOC110910056/LOC110897855/LOC110942324/LOC110873594/LOC110890832/LOC110905172/LOC110880271/LOC110864408/LOC110873800/LOC110921418/LOC110935487	11
BP	GO:0044283	small molecule biosynthetic process	66/1826	253/10514	0.000279698	0.00533298	110890891/110919696/110879833/110891332/110883802/110882039/110926472/110942378/110911750/110916150/110897855/110925931/110904216/110874405/110868287/110865490/110884250/110910537/110880108/110928848/110897428/110930517/110911552/110942177/110898236/110865716/110935992/110879516/110873594/110913018/110917085/110912883/110937667/110926857/110890832/110941716/110898235/110873272/110877928/110885610…	LOC110890891/LOC110919696/LOC110879833/LOC110891332/LOC110883802/LOC110882039/LOC110926472/LOC110942378/LOC110911750/LOC110916150/LOC110897855/LOC110925931/LOC110904216/LOC110874405/LOC110868287/LOC110865490/LOC110884250/LOC110910537/LOC110880108/LOC110928848/LOC110897428/LOC110930517/LOC110911552/LOC110942177/LOC110898236/LOC110865716/LOC110935992/LOC110879516/LOC110873594/LOC110913018/LOC110917…	66
BP	GO:0072525	pyridine-containing compound biosynthetic process	26/1826	76/10514	0.000288269	0.00533298	110895845/110879833/110891332/110882039/110916150/110925931/110874405/110865490/110880108/110930517/110911552/110942177/110865716/110935992/110879516/110912883/110912366/110882734/110878813/110865068/110909022/110867753/110908654/110929796/110899468/110869292	LOC110895845/LOC110879833/LOC110891332/LOC110882039/LOC110916150/LOC110925931/LOC110874405/LOC110865490/LOC110880108/LOC110930517/LOC110911552/LOC110942177/LOC110865716/LOC110935992/LOC110879516/LOC110912883/LOC110912366/LOC110882734/LOC110878813/LOC110865068/LOC110909022/LOC110867753/LOC110908654/LOC110929796/LOC110899468/LOC110869292	26
BP	GO:0034613	cellular protein localization	41/1826	140/10514	0.00032079	0.00553897	110889895/110926651/110940771/110871632/110868146/110926317/110935427/110878880/110864264/110904575/110879978/110865472/110929478/110889328/110928674/110889625/110918798/110921264/110885364/110894845/110910191/110916687/110932380/110916486/110865703/110900076/110922761/110917026/110878075/110897866/110916469/110865705/110885461/110896021/110917699/110938068/110870058/110908160/110922434/110886069…	LOC110889895/LOC110926651/LOC110940771/LOC110871632/LOC110868146/LOC110926317/LOC110935427/LOC110878880/LOC110864264/LOC110904575/LOC110879978/LOC110865472/LOC110929478/LOC110889328/LOC110928674/LOC110889625/LOC110918798/LOC110921264/LOC110885364/LOC110894845/LOC110910191/LOC110916687/LOC110932380/LOC110916486/LOC110865703/LOC110900076/LOC110922761/LOC110917026/LOC110878075/LOC110897866/LOC110916…	41
BP	GO:0070727	cellular macromolecule localization	41/1826	140/10514	0.00032079	0.00553897	110889895/110926651/110940771/110871632/110868146/110926317/110935427/110878880/110864264/110904575/110879978/110865472/110929478/110889328/110928674/110889625/110918798/110921264/110885364/110894845/110910191/110916687/110932380/110916486/110865703/110900076/110922761/110917026/110878075/110897866/110916469/110865705/110885461/110896021/110917699/110938068/110870058/110908160/110922434/110886069…	LOC110889895/LOC110926651/LOC110940771/LOC110871632/LOC110868146/LOC110926317/LOC110935427/LOC110878880/LOC110864264/LOC110904575/LOC110879978/LOC110865472/LOC110929478/LOC110889328/LOC110928674/LOC110889625/LOC110918798/LOC110921264/LOC110885364/LOC110894845/LOC110910191/LOC110916687/LOC110932380/LOC110916486/LOC110865703/LOC110900076/LOC110922761/LOC110917026/LOC110878075/LOC110897866/LOC110916…	41
BP	GO:0051641	cellular localization	49/1826	176/10514	0.00033615	0.00561696	110889895/110926651/110940771/110871632/110922188/110868146/110865863/110926317/110935427/110878880/110864264/110904575/110879978/110865472/110929478/110889328/110928674/110889625/110918798/110921264/110885364/110894845/110910191/110916687/110932380/110916486/110937502/110865703/110900076/110922761/110917026/110878075/110909649/110897866/110916469/110872093/110865705/110885461/110896021/110917699…	LOC110889895/LOC110926651/LOC110940771/LOC110871632/LOC110922188/LOC110868146/LOC110865863/LOC110926317/LOC110935427/LOC110878880/LOC110864264/LOC110904575/LOC110879978/LOC110865472/LOC110929478/LOC110889328/LOC110928674/LOC110889625/LOC110918798/LOC110921264/LOC110885364/LOC110894845/LOC110910191/LOC110916687/LOC110932380/LOC110916486/LOC110937502/LOC110865703/LOC110900076/LOC110922761/LOC110917…	49
BP	GO:0072524	pyridine-containing compound metabolic process	28/1826	85/10514	0.000350882	0.00567991	110895845/110879833/110891332/110882039/110868740/110916150/110925931/110874405/110865490/110880108/110930517/110911552/110942177/110865716/110935992/110879516/110912883/110912366/110882734/110878813/110865068/110871961/110909022/110867753/110908654/110929796/110899468/110869292	LOC110895845/LOC110879833/LOC110891332/LOC110882039/LOC110868740/LOC110916150/LOC110925931/LOC110874405/LOC110865490/LOC110880108/LOC110930517/LOC110911552/LOC110942177/LOC110865716/LOC110935992/LOC110879516/LOC110912883/LOC110912366/LOC110882734/LOC110878813/LOC110865068/LOC110871961/LOC110909022/LOC110867753/LOC110908654/LOC110929796/LOC110899468/LOC110869292	28
BP	GO:0055086	nucleobase-containing small molecule metabolic process	56/1826	209/10514	0.000385026	0.00591218	110895845/110910056/110891332/110921744/110882039/110864768/110868740/110916150/110897855/110925931/110930517/110911552/110942324/110942177/110865716/110935992/110872003/110879516/110873594/110912883/110890832/110904915/110893776/110889052/110905172/110942232/110880271/110921126/110864408/110912366/110941202/110882734/110865304/110864955/110878813/110865068/110871961/110868960/110898870/novel.470…	LOC110895845/LOC110910056/LOC110891332/LOC110921744/LOC110882039/LOC110864768/LOC110868740/LOC110916150/LOC110897855/LOC110925931/LOC110930517/LOC110911552/LOC110942324/LOC110942177/LOC110865716/LOC110935992/LOC110872003/LOC110879516/LOC110873594/LOC110912883/LOC110890832/LOC110904915/LOC110893776/LOC110889052/LOC110905172/LOC110942232/LOC110880271/LOC110921126/LOC110864408/LOC110912366/LOC110941…	56
BP	GO:0009117	nucleotide metabolic process	49/1826	177/10514	0.000388058	0.00591218	110895845/110910056/110891332/110882039/110868740/110916150/110897855/110925931/110930517/110911552/110942324/110942177/110865716/110935992/110872003/110879516/110873594/110912883/110890832/110904915/110893776/110905172/110942232/110880271/110864408/110912366/110941202/110882734/110864955/110878813/110865068/110871961/110868960/110898870/novel.4704/110873800/110909022/110921472/110867753/11094152…	LOC110895845/LOC110910056/LOC110891332/LOC110882039/LOC110868740/LOC110916150/LOC110897855/LOC110925931/LOC110930517/LOC110911552/LOC110942324/LOC110942177/LOC110865716/LOC110935992/LOC110872003/LOC110879516/LOC110873594/LOC110912883/LOC110890832/LOC110904915/LOC110893776/LOC110905172/LOC110942232/LOC110880271/LOC110864408/LOC110912366/LOC110941202/LOC110882734/LOC110864955/LOC110878813/LOC110865…	49
BP	GO:0008104	protein localization	51/1826	187/10514	0.000439301	0.00641442	110878653/110920081/110889895/110936882/110926651/110940771/110871632/110923437/110940163/110868245/110868146/110926317/110884124/110935427/110878880/110864264/110904575/110880110/110879978/110865472/110929478/110889328/110928674/110889625/110918798/110921264/110885364/110894845/110910191/110916687/110932380/110878118/110916486/110865703/110878815/110900076/110922761/110917026/110878075/110897866…	LOC110878653/LOC110920081/LOC110889895/LOC110936882/LOC110926651/LOC110940771/LOC110871632/LOC110923437/LOC110940163/LOC110868245/LOC110868146/LOC110926317/LOC110884124/LOC110935427/LOC110878880/LOC110864264/LOC110904575/LOC110880110/LOC110879978/LOC110865472/LOC110929478/LOC110889328/LOC110928674/LOC110889625/LOC110918798/LOC110921264/LOC110885364/LOC110894845/LOC110910191/LOC110916687/LOC110932…	51
BP	GO:0045184	establishment of protein localization	49/1826	178/10514	0.000447036	0.00641442	110878653/110920081/110889895/110936882/110926651/110940771/110871632/110923437/110940163/110868245/110926317/110884124/110935427/110878880/110864264/110904575/110880110/110879978/110865472/110929478/110889328/110928674/110889625/110918798/110921264/110885364/110894845/110910191/110916687/110932380/110878118/110916486/110865703/110878815/110900076/110922761/110917026/110878075/110897866/110916469…	LOC110878653/LOC110920081/LOC110889895/LOC110936882/LOC110926651/LOC110940771/LOC110871632/LOC110923437/LOC110940163/LOC110868245/LOC110926317/LOC110884124/LOC110935427/LOC110878880/LOC110864264/LOC110904575/LOC110880110/LOC110879978/LOC110865472/LOC110929478/LOC110889328/LOC110928674/LOC110889625/LOC110918798/LOC110921264/LOC110885364/LOC110894845/LOC110910191/LOC110916687/LOC110932380/LOC110878…	49
BP	GO:0000096	sulfur amino acid metabolic process	8/1826	13/10514	0.000458173	0.00641442	110937588/110873277/110864809/110898236/110898235/110868496/110929779/110904332	LOC110937588/LOC110873277/LOC110864809/LOC110898236/LOC110898235/LOC110868496/LOC110929779/LOC110904332	8
BP	GO:0090407	organophosphate biosynthetic process	50/1826	183/10514	0.000475194	0.00647764	110895845/110879833/110891332/110882039/110916150/110897855/110925931/110874405/110910129/110865490/110880108/110930517/110911552/110904982/110942177/110865716/110935992/110879516/110873594/110912883/110864837/110890832/110904915/110893776/110942232/110872496/110864408/110904985/110912366/110882734/110864955/110878813/110865068/110868960/110898870/novel.4704/110909022/110944573/110921472/11086775…	LOC110895845/LOC110879833/LOC110891332/LOC110882039/LOC110916150/LOC110897855/LOC110925931/LOC110874405/LOC110910129/LOC110865490/LOC110880108/LOC110930517/LOC110911552/LOC110904982/LOC110942177/LOC110865716/LOC110935992/LOC110879516/LOC110873594/LOC110912883/LOC110864837/LOC110890832/LOC110904915/LOC110893776/LOC110942232/LOC110872496/LOC110864408/LOC110904985/LOC110912366/LOC110882734/LOC110864…	50
BP	GO:0009073	aromatic amino acid family biosynthetic process	10/1826	19/10514	0.00049007	0.00650914	110919696/110883802/110942378/110904216/110913018/110926857/110877928/110941290/110909005/110928670	LOC110919696/LOC110883802/LOC110942378/LOC110904216/LOC110913018/LOC110926857/LOC110877928/LOC110941290/LOC110909005/LOC110928670	10
BP	GO:0072521	purine-containing compound metabolic process	41/1826	143/10514	0.000519814	0.00659505	110910056/110891332/110882039/110916150/110897855/110925931/110930517/110911552/110942324/110942177/110865716/110935992/110872003/110879516/110873594/110912883/110890832/110904915/110893776/110905172/110880271/110864408/110941202/110882734/110865304/110864955/110865068/110868960/110898870/novel.4704/110873800/110909022/110941521/110908654/110921418/110929796/110895303/110935487/110899468/11086929…	LOC110910056/LOC110891332/LOC110882039/LOC110916150/LOC110897855/LOC110925931/LOC110930517/LOC110911552/LOC110942324/LOC110942177/LOC110865716/LOC110935992/LOC110872003/LOC110879516/LOC110873594/LOC110912883/LOC110890832/LOC110904915/LOC110893776/LOC110905172/LOC110880271/LOC110864408/LOC110941202/LOC110882734/LOC110865304/LOC110864955/LOC110865068/LOC110868960/LOC110898870/-/LOC110873800/LOC1109…	41
BP	GO:0006457	protein folding	36/1826	121/10514	0.000522002	0.00659505	110898983/110916058/110920661/110872723/110885446/110894285/110889182/110911022/110885826/110886746/110912160/110929584/110864607/110890350/110921102/110915989/110921384/110897322/110873297/110914993/110929712/110937290/110938002/110884077/110890575/110885727/110890643/110891517/110908202/110928755/110926129/110873266/110865890/110890265/110939570/110916533	LOC110898983/LOC110916058/LOC110920661/LOC110872723/LOC110885446/LOC110894285/LOC110889182/LOC110911022/LOC110885826/LOC110886746/LOC110912160/LOC110929584/LOC110864607/LOC110890350/LOC110921102/LOC110915989/LOC110921384/LOC110897322/LOC110873297/LOC110914993/LOC110929712/LOC110937290/LOC110938002/LOC110884077/LOC110890575/LOC110885727/LOC110890643/LOC110891517/LOC110908202/LOC110928755/LOC110926…	36
BP	GO:0006753	nucleoside phosphate metabolic process	49/1826	180/10514	0.000589571	0.0071482	110895845/110910056/110891332/110882039/110868740/110916150/110897855/110925931/110930517/110911552/110942324/110942177/110865716/110935992/110872003/110879516/110873594/110912883/110890832/110904915/110893776/110905172/110942232/110880271/110864408/110912366/110941202/110882734/110864955/110878813/110865068/110871961/110868960/110898870/novel.4704/110873800/110909022/110921472/110867753/11094152…	LOC110895845/LOC110910056/LOC110891332/LOC110882039/LOC110868740/LOC110916150/LOC110897855/LOC110925931/LOC110930517/LOC110911552/LOC110942324/LOC110942177/LOC110865716/LOC110935992/LOC110872003/LOC110879516/LOC110873594/LOC110912883/LOC110890832/LOC110904915/LOC110893776/LOC110905172/LOC110942232/LOC110880271/LOC110864408/LOC110912366/LOC110941202/LOC110882734/LOC110864955/LOC110878813/LOC110865…	49
BP	GO:0046907	intracellular transport	41/1826	144/10514	0.000607183	0.0071482	110926651/110922188/110865863/110935427/110878880/110864264/110904575/110879978/110865472/110929478/110889328/110928674/110889625/110918798/110921264/110885364/110894845/110910191/110916687/110932380/110916486/110937502/110865703/110900076/110922761/110917026/110878075/110909649/110897866/110916469/110872093/110865705/110885461/110896021/110917699/110938068/110870058/110869119/110922434/110886069…	LOC110926651/LOC110922188/LOC110865863/LOC110935427/LOC110878880/LOC110864264/LOC110904575/LOC110879978/LOC110865472/LOC110929478/LOC110889328/LOC110928674/LOC110889625/LOC110918798/LOC110921264/LOC110885364/LOC110894845/LOC110910191/LOC110916687/LOC110932380/LOC110916486/LOC110937502/LOC110865703/LOC110900076/LOC110922761/LOC110917026/LOC110878075/LOC110909649/LOC110897866/LOC110916469/LOC110872…	41
BP	GO:0051649	establishment of localization in cell	41/1826	144/10514	0.000607183	0.0071482	110926651/110922188/110865863/110935427/110878880/110864264/110904575/110879978/110865472/110929478/110889328/110928674/110889625/110918798/110921264/110885364/110894845/110910191/110916687/110932380/110916486/110937502/110865703/110900076/110922761/110917026/110878075/110909649/110897866/110916469/110872093/110865705/110885461/110896021/110917699/110938068/110870058/110869119/110922434/110886069…	LOC110926651/LOC110922188/LOC110865863/LOC110935427/LOC110878880/LOC110864264/LOC110904575/LOC110879978/LOC110865472/LOC110929478/LOC110889328/LOC110928674/LOC110889625/LOC110918798/LOC110921264/LOC110885364/LOC110894845/LOC110910191/LOC110916687/LOC110932380/LOC110916486/LOC110937502/LOC110865703/LOC110900076/LOC110922761/LOC110917026/LOC110878075/LOC110909649/LOC110897866/LOC110916469/LOC110872…	41
BP	GO:0009072	aromatic amino acid family metabolic process	12/1826	26/10514	0.0006328	0.00728423	110919696/110883802/110942378/110904216/110899323/110913018/110926857/110877928/110941290/110909005/110930071/110928670	LOC110919696/LOC110883802/LOC110942378/LOC110904216/LOC110899323/LOC110913018/LOC110926857/LOC110877928/LOC110941290/LOC110909005/LOC110930071/LOC110928670	12
BP	GO:0006163	purine nucleotide metabolic process	40/1826	141/10514	0.00076089	0.00856828	110910056/110891332/110882039/110916150/110897855/110925931/110930517/110911552/110942324/110942177/110865716/110935992/110872003/110879516/110873594/110912883/110890832/110904915/110893776/110905172/110880271/110864408/110941202/110882734/110864955/110865068/110868960/110898870/novel.4704/110873800/110909022/110941521/110908654/110921418/110929796/110895303/110935487/110899468/110869292/110910210	LOC110910056/LOC110891332/LOC110882039/LOC110916150/LOC110897855/LOC110925931/LOC110930517/LOC110911552/LOC110942324/LOC110942177/LOC110865716/LOC110935992/LOC110872003/LOC110879516/LOC110873594/LOC110912883/LOC110890832/LOC110904915/LOC110893776/LOC110905172/LOC110880271/LOC110864408/LOC110941202/LOC110882734/LOC110864955/LOC110865068/LOC110868960/LOC110898870/-/LOC110873800/LOC110909022/LOC1109…	40
BP	GO:0000413	protein peptidyl-prolyl isomerization	14/1826	34/10514	0.000934562	0.0100855	110920661/110872723/110885446/110889182/110911022/110864607/110921102/110921384/110884077/110890643/110891517/110908202/110928755/110939570	LOC110920661/LOC110872723/LOC110885446/LOC110889182/LOC110911022/LOC110864607/LOC110921102/LOC110921384/LOC110884077/LOC110890643/LOC110891517/LOC110908202/LOC110928755/LOC110939570	14
BP	GO:0018208	peptidyl-proline modification	14/1826	34/10514	0.000934562	0.0100855	110920661/110872723/110885446/110889182/110911022/110864607/110921102/110921384/110884077/110890643/110891517/110908202/110928755/110939570	LOC110920661/LOC110872723/LOC110885446/LOC110889182/LOC110911022/LOC110864607/LOC110921102/LOC110921384/LOC110884077/LOC110890643/LOC110891517/LOC110908202/LOC110928755/LOC110939570	14
BP	GO:0034404	nucleobase-containing small molecule biosynthetic process	23/1826	69/10514	0.000954107	0.0100863	110891332/110882039/110916150/110897855/110925931/110930517/110911552/110942177/110865716/110935992/110879516/110873594/110912883/110890832/110864408/110882734/110865068/110909022/110908654/110921418/110929796/110899468/110869292	LOC110891332/LOC110882039/LOC110916150/LOC110897855/LOC110925931/LOC110930517/LOC110911552/LOC110942177/LOC110865716/LOC110935992/LOC110879516/LOC110873594/LOC110912883/LOC110890832/LOC110864408/LOC110882734/LOC110865068/LOC110909022/LOC110908654/LOC110921418/LOC110929796/LOC110899468/LOC110869292	23
BP	GO:0009165	nucleotide biosynthetic process	38/1826	134/10514	0.00102552	0.010416	110895845/110891332/110882039/110916150/110897855/110925931/110930517/110911552/110942177/110865716/110935992/110879516/110873594/110912883/110890832/110904915/110893776/110942232/110864408/110912366/110882734/110864955/110878813/110865068/110868960/110898870/novel.4704/110909022/110921472/110867753/110941521/110908654/110921418/110929796/110922369/110895303/110899468/110869292	LOC110895845/LOC110891332/LOC110882039/LOC110916150/LOC110897855/LOC110925931/LOC110930517/LOC110911552/LOC110942177/LOC110865716/LOC110935992/LOC110879516/LOC110873594/LOC110912883/LOC110890832/LOC110904915/LOC110893776/LOC110942232/LOC110864408/LOC110912366/LOC110882734/LOC110864955/LOC110878813/LOC110865068/LOC110868960/LOC110898870/-/LOC110909022/LOC110921472/LOC110867753/LOC110941521/LOC1109…	38
BP	GO:1901293	nucleoside phosphate biosynthetic process	38/1826	134/10514	0.00102552	0.010416	110895845/110891332/110882039/110916150/110897855/110925931/110930517/110911552/110942177/110865716/110935992/110879516/110873594/110912883/110890832/110904915/110893776/110942232/110864408/110912366/110882734/110864955/110878813/110865068/110868960/110898870/novel.4704/110909022/110921472/110867753/110941521/110908654/110921418/110929796/110922369/110895303/110899468/110869292	LOC110895845/LOC110891332/LOC110882039/LOC110916150/LOC110897855/LOC110925931/LOC110930517/LOC110911552/LOC110942177/LOC110865716/LOC110935992/LOC110879516/LOC110873594/LOC110912883/LOC110890832/LOC110904915/LOC110893776/LOC110942232/LOC110864408/LOC110912366/LOC110882734/LOC110864955/LOC110878813/LOC110865068/LOC110868960/LOC110898870/-/LOC110909022/LOC110921472/LOC110867753/LOC110941521/LOC1109…	38
BP	GO:0009116	nucleoside metabolic process	16/1826	42/10514	0.00113092	0.0109749	110910056/110921744/110897855/110942324/110873594/110890832/110889052/110905172/110880271/110921126/110864408/110897720/110873800/110929612/110921418/110935487	LOC110910056/LOC110921744/LOC110897855/LOC110942324/LOC110873594/LOC110890832/LOC110889052/LOC110905172/LOC110880271/LOC110921126/LOC110864408/LOC110897720/LOC110873800/LOC110929612/LOC110921418/LOC110935487	16
BP	GO:1901657	glycosyl compound metabolic process	16/1826	42/10514	0.00113092	0.0109749	110910056/110921744/110897855/110942324/110873594/110890832/110889052/110905172/110880271/110921126/110864408/110897720/110873800/110929612/110921418/110935487	LOC110910056/LOC110921744/LOC110897855/LOC110942324/LOC110873594/LOC110890832/LOC110889052/LOC110905172/LOC110880271/LOC110921126/LOC110864408/LOC110897720/LOC110873800/LOC110929612/LOC110921418/LOC110935487	16
BP	GO:0006414	translational elongation	11/1826	24/10514	0.0011441	0.0109749	110916994/110864308/110885476/110878543/110879900/110915499/110915453/110876687/110886920/110926196/110915257	LOC110916994/LOC110864308/LOC110885476/LOC110878543/LOC110879900/LOC110915499/LOC110915453/LOC110876687/LOC110886920/LOC110926196/LOC110915257	11
BP	GO:0033036	macromolecule localization	53/1826	205/10514	0.0013292	0.0125187	110878653/110885911/110920081/110889895/110936882/110926651/110927292/110940771/110871632/110923437/110940163/110868245/110868146/110926317/110884124/110935427/110878880/110864264/110904575/110880110/110879978/110865472/110929478/110889328/110928674/110889625/110918798/110921264/110885364/110894845/110910191/110916687/110932380/110878118/110916486/110865703/110878815/110900076/110922761/110917026…	LOC110878653/LOC110885911/LOC110920081/LOC110889895/LOC110936882/LOC110926651/LOC110927292/LOC110940771/LOC110871632/LOC110923437/LOC110940163/LOC110868245/LOC110868146/LOC110926317/LOC110884124/LOC110935427/LOC110878880/LOC110864264/LOC110904575/LOC110880110/LOC110879978/LOC110865472/LOC110929478/LOC110889328/LOC110928674/LOC110889625/LOC110918798/LOC110921264/LOC110885364/LOC110894845/LOC110910…	53
MF	GO:0016874	ligase activity	37/2723	129/16508	0.000355061	0.0143208	110920890/110890891/110886001/110884133/110897855/110890364/110906664/110942107/110885253/110864406/110884589/110877764/110941716/110873272/110942232/110872630/110929323/110864408/110865304/110864955/110890719/110930199/110936156/110895011/110941711/110921564/110879634/110912340/110877480/110890326/110868906/110908720/110929145/110895577/110936742/110936333/110869276	LOC110920890/LOC110890891/LOC110886001/LOC110884133/LOC110897855/LOC110890364/LOC110906664/LOC110942107/LOC110885253/LOC110864406/LOC110884589/LOC110877764/LOC110941716/LOC110873272/LOC110942232/LOC110872630/LOC110929323/LOC110864408/LOC110865304/LOC110864955/LOC110890719/LOC110930199/LOC110936156/LOC110895011/LOC110941711/LOC110921564/LOC110879634/LOC110912340/LOC110877480/LOC110890326/LOC110868…	37
BP	GO:0006090	pyruvate metabolic process	21/1826	63/10514	0.00156176	0.0144463	110891332/110882039/110916150/110925931/110930517/110911552/110904982/110942177/110865716/110935992/110879516/110912883/110882734/110865068/110909022/110908654/110929796/110916217/110899468/110872284/110869292	LOC110891332/LOC110882039/LOC110916150/LOC110925931/LOC110930517/LOC110911552/LOC110904982/LOC110942177/LOC110865716/LOC110935992/LOC110879516/LOC110912883/LOC110882734/LOC110865068/LOC110909022/LOC110908654/LOC110929796/LOC110916217/LOC110899468/LOC110872284/LOC110869292	21
BP	GO:0019693	ribose phosphate metabolic process	40/1826	147/10514	0.00181418	0.0159564	110910056/110891332/110882039/110868740/110916150/110897855/110925931/110930517/110911552/110942324/110942177/110865716/110935992/110872003/110879516/110873594/110912883/110890832/110904915/110893776/110905172/110880271/110864408/110941202/110882734/110865068/110871961/110868960/novel.4704/110873800/110909022/110941521/110908654/110921418/110929796/110895303/110935487/110899468/110869292/110910210	LOC110910056/LOC110891332/LOC110882039/LOC110868740/LOC110916150/LOC110897855/LOC110925931/LOC110930517/LOC110911552/LOC110942324/LOC110942177/LOC110865716/LOC110935992/LOC110872003/LOC110879516/LOC110873594/LOC110912883/LOC110890832/LOC110904915/LOC110893776/LOC110905172/LOC110880271/LOC110864408/LOC110941202/LOC110882734/LOC110865068/LOC110871961/LOC110868960/-/LOC110873800/LOC110909022/LOC1109…	40
BP	GO:0072522	purine-containing compound biosynthetic process	32/1826	111/10514	0.00184404	0.0159564	110891332/110882039/110916150/110897855/110925931/110930517/110911552/110942177/110865716/110935992/110879516/110873594/110912883/110890832/110904915/110893776/110864408/110882734/110865304/110864955/110865068/110868960/110898870/novel.4704/110909022/110941521/110908654/110921418/110929796/110895303/110899468/110869292	LOC110891332/LOC110882039/LOC110916150/LOC110897855/LOC110925931/LOC110930517/LOC110911552/LOC110942177/LOC110865716/LOC110935992/LOC110879516/LOC110873594/LOC110912883/LOC110890832/LOC110904915/LOC110893776/LOC110864408/LOC110882734/LOC110865304/LOC110864955/LOC110865068/LOC110868960/LOC110898870/-/LOC110909022/LOC110941521/LOC110908654/LOC110921418/LOC110929796/LOC110895303/LOC110899468/LOC1108…	32
BP	GO:0009150	purine ribonucleotide metabolic process	38/1826	138/10514	0.00184824	0.0159564	110910056/110891332/110882039/110916150/110897855/110925931/110930517/110911552/110942324/110942177/110865716/110935992/110872003/110879516/110873594/110912883/110890832/110904915/110893776/110905172/110880271/110864408/110941202/110882734/110865068/110868960/novel.4704/110873800/110909022/110941521/110908654/110921418/110929796/110895303/110935487/110899468/110869292/110910210	LOC110910056/LOC110891332/LOC110882039/LOC110916150/LOC110897855/LOC110925931/LOC110930517/LOC110911552/LOC110942324/LOC110942177/LOC110865716/LOC110935992/LOC110872003/LOC110879516/LOC110873594/LOC110912883/LOC110890832/LOC110904915/LOC110893776/LOC110905172/LOC110880271/LOC110864408/LOC110941202/LOC110882734/LOC110865068/LOC110868960/-/LOC110873800/LOC110909022/LOC110941521/LOC110908654/LOC1109…	38
BP	GO:0009259	ribonucleotide metabolic process	38/1826	138/10514	0.00184824	0.0159564	110910056/110891332/110882039/110916150/110897855/110925931/110930517/110911552/110942324/110942177/110865716/110935992/110872003/110879516/110873594/110912883/110890832/110904915/110893776/110905172/110880271/110864408/110941202/110882734/110865068/110868960/novel.4704/110873800/110909022/110941521/110908654/110921418/110929796/110895303/110935487/110899468/110869292/110910210	LOC110910056/LOC110891332/LOC110882039/LOC110916150/LOC110897855/LOC110925931/LOC110930517/LOC110911552/LOC110942324/LOC110942177/LOC110865716/LOC110935992/LOC110872003/LOC110879516/LOC110873594/LOC110912883/LOC110890832/LOC110904915/LOC110893776/LOC110905172/LOC110880271/LOC110864408/LOC110941202/LOC110882734/LOC110865068/LOC110868960/-/LOC110873800/LOC110909022/LOC110941521/LOC110908654/LOC1109…	38
MF	GO:0003755	peptidyl-prolyl cis-trans isomerase activity	14/2723	34/16508	0.000551988	0.0165517	110920661/110872723/110885446/110889182/110911022/110864607/110921102/110921384/110884077/110890643/110891517/110908202/110928755/110939570	LOC110920661/LOC110872723/LOC110885446/LOC110889182/LOC110911022/LOC110864607/LOC110921102/LOC110921384/LOC110884077/LOC110890643/LOC110891517/LOC110908202/LOC110928755/LOC110939570	14
MF	GO:0016859	cis-trans isomerase activity	14/2723	34/16508	0.000551988	0.0165517	110920661/110872723/110885446/110889182/110911022/110864607/110921102/110921384/110884077/110890643/110891517/110908202/110928755/110939570	LOC110920661/LOC110872723/LOC110885446/LOC110889182/LOC110911022/LOC110864607/LOC110921102/LOC110921384/LOC110884077/LOC110890643/LOC110891517/LOC110908202/LOC110928755/LOC110939570	14
MF	GO:0016765	transferase activity, transferring alkyl or aryl (other than methyl) groups	15/2723	38/16508	0.000604548	0.0165517	110919696/110941174/110883802/110909088/110942378/110917211/110868285/110937749/110885610/110941290/110915097/110894007/110909005/110875595/110926293	LOC110919696/LOC110941174/LOC110883802/LOC110909088/LOC110942378/LOC110917211/LOC110868285/LOC110937749/LOC110885610/LOC110941290/LOC110915097/LOC110894007/LOC110909005/LOC110875595/LOC110926293	15
MF	GO:0015297	antiporter activity	26/2723	83/16508	0.000604761	0.0165517	110936317/110940837/110935629/110942400/110930059/110872013/110940835/110937668/110873542/110917743/110931061/110900371/110915208/110925643/110878979/110868425/110918665/110883783/110910597/110928514/110909286/110898053/110915411/110904839/110909287/110884173	LOC110936317/LOC110940837/LOC110935629/LOC110942400/LOC110930059/LOC110872013/LOC110940835/LOC110937668/LOC110873542/LOC110917743/LOC110931061/LOC110900371/LOC110915208/LOC110925643/LOC110878979/LOC110868425/LOC110918665/LOC110883783/LOC110910597/LOC110928514/LOC110909286/LOC110898053/LOC110915411/LOC110904839/LOC110909287/LOC110884173	26
MF	GO:0015291	secondary active transmembrane transporter activity	28/2723	92/16508	0.000638356	0.0165517	110936317/110940837/110935629/110942400/110930059/110927242/110872013/110940835/110937668/110873542/110917743/110931061/110900371/110915208/110925643/110915881/110878979/110868425/110918665/110883783/110910597/110928514/110909286/110898053/110915411/110904839/110909287/110884173	LOC110936317/LOC110940837/LOC110935629/LOC110942400/LOC110930059/LOC110927242/LOC110872013/LOC110940835/LOC110937668/LOC110873542/LOC110917743/LOC110931061/LOC110900371/LOC110915208/LOC110925643/LOC110915881/LOC110878979/LOC110868425/LOC110918665/LOC110883783/LOC110910597/LOC110928514/LOC110909286/LOC110898053/LOC110915411/LOC110904839/LOC110909287/LOC110884173	28
MF	GO:0003746	translation elongation factor activity	11/2723	24/16508	0.000735265	0.0168205	110916994/110864308/110885476/110878543/110879900/110915499/110915453/110876687/110886920/110926196/110915257	LOC110916994/LOC110864308/LOC110885476/LOC110878543/LOC110879900/LOC110915499/LOC110915453/LOC110876687/LOC110886920/LOC110926196/LOC110915257	11
MF	GO:0003924	GTPase activity	22/2723	67/16508	0.000765426	0.0168205	110890873/110889323/110873866/110865507/110867693/110898952/110929439/110940095/110927198/110867888/110918093/110898253/110931054/110937519/110873549/110920989/110890347/110879018/110908203/110929501/110871606/110876680	LOC110890873/LOC110889323/LOC110873866/LOC110865507/LOC110867693/LOC110898952/LOC110929439/LOC110940095/LOC110927198/LOC110867888/LOC110918093/LOC110898253/LOC110931054/LOC110937519/LOC110873549/LOC110920989/LOC110890347/LOC110879018/LOC110908203/LOC110929501/LOC110871606/LOC110876680	22
MF	GO:0015238	drug transmembrane transporter activity	20/2723	59/16508	0.000832049	0.0168205	110936317/110940837/110935629/110942400/110930059/110872013/110940835/110873542/110917743/110915208/110925643/110878979/110918665/110883783/110928514/110909286/110898053/110915411/110904839/110909287	LOC110936317/LOC110940837/LOC110935629/LOC110942400/LOC110930059/LOC110872013/LOC110940835/LOC110873542/LOC110917743/LOC110915208/LOC110925643/LOC110878979/LOC110918665/LOC110883783/LOC110928514/LOC110909286/LOC110898053/LOC110915411/LOC110904839/LOC110909287	20
MF	GO:0003743	translation initiation factor activity	15/2723	39/16508	0.000834074	0.0168205	110920796/110885778/110873805/110908314/110930710/110908505/110873367/110944353/110899864/110918518/110930712/110895078/110885444/110937380/110886254	LOC110920796/LOC110885778/LOC110873805/LOC110908314/LOC110930710/LOC110908505/LOC110873367/LOC110944353/LOC110899864/LOC110918518/LOC110930712/LOC110895078/LOC110885444/LOC110937380/LOC110886254	15
MF	GO:0051536	iron-sulfur cluster binding	25/2723	81/16508	0.000971391	0.0176307	110922567/110897428/110868905/110926662/110908380/110884272/110913069/110890956/110885074/110898900/110918821/110912246/110925852/110899195/110915949/110909265/110908509/110868046/110891035/110908712/110865190/110940632/110918703/110897818/110921665	LOC110922567/LOC110897428/LOC110868905/LOC110926662/LOC110908380/LOC110884272/LOC110913069/LOC110890956/LOC110885074/LOC110898900/LOC110918821/LOC110912246/LOC110925852/LOC110899195/LOC110915949/LOC110909265/LOC110908509/LOC110868046/LOC110891035/LOC110908712/LOC110865190/LOC110940632/LOC110918703/LOC110897818/LOC110921665	25
MF	GO:0051540	metal cluster binding	25/2723	81/16508	0.000971391	0.0176307	110922567/110897428/110868905/110926662/110908380/110884272/110913069/110890956/110885074/110898900/110918821/110912246/110925852/110899195/110915949/110909265/110908509/110868046/110891035/110908712/110865190/110940632/110918703/110897818/110921665	LOC110922567/LOC110897428/LOC110868905/LOC110926662/LOC110908380/LOC110884272/LOC110913069/LOC110890956/LOC110885074/LOC110898900/LOC110918821/LOC110912246/LOC110925852/LOC110899195/LOC110915949/LOC110909265/LOC110908509/LOC110868046/LOC110891035/LOC110908712/LOC110865190/LOC110940632/LOC110918703/LOC110897818/LOC110921665	25
CC	GO:0019867	outer membrane	13/757	25/3553	0.00067198	0.0177403	110868057/110936627/110927132/110926461/110879233/110921264/110891069/110911026/110903972/110922761/110910447/110868132/110873421	LOC110868057/LOC110936627/LOC110927132/LOC110926461/LOC110879233/LOC110921264/LOC110891069/LOC110911026/LOC110903972/LOC110922761/LOC110910447/LOC110868132/LOC110873421	13
BP	GO:0016053	organic acid biosynthetic process	54/1826	214/10514	0.00215725	0.0180235	110890891/110919696/110891332/110883802/110882039/110942378/110911750/110916150/110925931/110904216/110868287/110884250/110910537/110928848/110930517/110911552/110942177/110898236/110865716/110935992/110879516/110913018/110917085/110912883/110937667/110926857/110941716/110898235/110873272/110877928/110885610/110941290/110882734/110868496/110909005/110864319/110895339/110865068/110929779/110873597…	LOC110890891/LOC110919696/LOC110891332/LOC110883802/LOC110882039/LOC110942378/LOC110911750/LOC110916150/LOC110925931/LOC110904216/LOC110868287/LOC110884250/LOC110910537/LOC110928848/LOC110930517/LOC110911552/LOC110942177/LOC110898236/LOC110865716/LOC110935992/LOC110879516/LOC110913018/LOC110917085/LOC110912883/LOC110937667/LOC110926857/LOC110941716/LOC110898235/LOC110873272/LOC110877928/LOC110885…	54
BP	GO:0046394	carboxylic acid biosynthetic process	54/1826	214/10514	0.00215725	0.0180235	110890891/110919696/110891332/110883802/110882039/110942378/110911750/110916150/110925931/110904216/110868287/110884250/110910537/110928848/110930517/110911552/110942177/110898236/110865716/110935992/110879516/110913018/110917085/110912883/110937667/110926857/110941716/110898235/110873272/110877928/110885610/110941290/110882734/110868496/110909005/110864319/110895339/110865068/110929779/110873597…	LOC110890891/LOC110919696/LOC110891332/LOC110883802/LOC110882039/LOC110942378/LOC110911750/LOC110916150/LOC110925931/LOC110904216/LOC110868287/LOC110884250/LOC110910537/LOC110928848/LOC110930517/LOC110911552/LOC110942177/LOC110898236/LOC110865716/LOC110935992/LOC110879516/LOC110913018/LOC110917085/LOC110912883/LOC110937667/LOC110926857/LOC110941716/LOC110898235/LOC110873272/LOC110877928/LOC110885…	54
BP	GO:0006886	intracellular protein transport	35/1826	126/10514	0.00233374	0.0191822	110926651/110935427/110878880/110864264/110904575/110879978/110865472/110929478/110889328/110928674/110889625/110918798/110921264/110885364/110894845/110910191/110916687/110932380/110916486/110865703/110900076/110922761/110917026/110878075/110897866/110916469/110865705/110885461/110896021/110917699/110938068/110870058/110922434/110886069/110872682	LOC110926651/LOC110935427/LOC110878880/LOC110864264/LOC110904575/LOC110879978/LOC110865472/LOC110929478/LOC110889328/LOC110928674/LOC110889625/LOC110918798/LOC110921264/LOC110885364/LOC110894845/LOC110910191/LOC110916687/LOC110932380/LOC110916486/LOC110865703/LOC110900076/LOC110922761/LOC110917026/LOC110878075/LOC110897866/LOC110916469/LOC110865705/LOC110885461/LOC110896021/LOC110917699/LOC110938…	35
BP	GO:0006165	nucleoside diphosphate phosphorylation	21/1826	65/10514	0.0024189	0.0191822	110891332/110882039/110916150/110925931/110930517/110911552/110942177/110865716/110935992/110879516/110873594/110912883/110890832/110882734/110865068/110909022/110908654/110921418/110929796/110899468/110869292	LOC110891332/LOC110882039/LOC110916150/LOC110925931/LOC110930517/LOC110911552/LOC110942177/LOC110865716/LOC110935992/LOC110879516/LOC110873594/LOC110912883/LOC110890832/LOC110882734/LOC110865068/LOC110909022/LOC110908654/LOC110921418/LOC110929796/LOC110899468/LOC110869292	21
BP	GO:0046939	nucleotide phosphorylation	21/1826	65/10514	0.0024189	0.0191822	110891332/110882039/110916150/110925931/110930517/110911552/110942177/110865716/110935992/110879516/110873594/110912883/110890832/110882734/110865068/110909022/110908654/110921418/110929796/110899468/110869292	LOC110891332/LOC110882039/LOC110916150/LOC110925931/LOC110930517/LOC110911552/LOC110942177/LOC110865716/LOC110935992/LOC110879516/LOC110873594/LOC110912883/LOC110890832/LOC110882734/LOC110865068/LOC110909022/LOC110908654/LOC110921418/LOC110929796/LOC110899468/LOC110869292	21
BP	GO:0006081	cellular aldehyde metabolic process	9/1826	19/10514	0.00244407	0.0191822	110879833/110868740/110874405/110865490/110880108/110904982/110871961/110916217/110872284	LOC110879833/LOC110868740/LOC110874405/LOC110865490/LOC110880108/LOC110904982/LOC110871961/LOC110916217/LOC110872284	9
BP	GO:0015031	protein transport	45/1826	173/10514	0.00260017	0.0195201	110878653/110920081/110936882/110926651/110923437/110940163/110868245/110884124/110935427/110878880/110864264/110904575/110880110/110879978/110865472/110929478/110889328/110928674/110889625/110918798/110921264/110885364/110894845/110910191/110916687/110932380/110878118/110916486/110865703/110878815/110900076/110922761/110917026/110878075/110897866/110916469/110865705/110885461/110896021/110917699…	LOC110878653/LOC110920081/LOC110936882/LOC110926651/LOC110923437/LOC110940163/LOC110868245/LOC110884124/LOC110935427/LOC110878880/LOC110864264/LOC110904575/LOC110880110/LOC110879978/LOC110865472/LOC110929478/LOC110889328/LOC110928674/LOC110889625/LOC110918798/LOC110921264/LOC110885364/LOC110894845/LOC110910191/LOC110916687/LOC110932380/LOC110878118/LOC110916486/LOC110865703/LOC110878815/LOC110900…	45
BP	GO:0015833	peptide transport	45/1826	173/10514	0.00260017	0.0195201	110878653/110920081/110936882/110926651/110923437/110940163/110868245/110884124/110935427/110878880/110864264/110904575/110880110/110879978/110865472/110929478/110889328/110928674/110889625/110918798/110921264/110885364/110894845/110910191/110916687/110932380/110878118/110916486/110865703/110878815/110900076/110922761/110917026/110878075/110897866/110916469/110865705/110885461/110896021/110917699…	LOC110878653/LOC110920081/LOC110936882/LOC110926651/LOC110923437/LOC110940163/LOC110868245/LOC110884124/LOC110935427/LOC110878880/LOC110864264/LOC110904575/LOC110880110/LOC110879978/LOC110865472/LOC110929478/LOC110889328/LOC110928674/LOC110889625/LOC110918798/LOC110921264/LOC110885364/LOC110894845/LOC110910191/LOC110916687/LOC110932380/LOC110878118/LOC110916486/LOC110865703/LOC110878815/LOC110900…	45
BP	GO:0042886	amide transport	45/1826	173/10514	0.00260017	0.0195201	110878653/110920081/110936882/110926651/110923437/110940163/110868245/110884124/110935427/110878880/110864264/110904575/110880110/110879978/110865472/110929478/110889328/110928674/110889625/110918798/110921264/110885364/110894845/110910191/110916687/110932380/110878118/110916486/110865703/110878815/110900076/110922761/110917026/110878075/110897866/110916469/110865705/110885461/110896021/110917699…	LOC110878653/LOC110920081/LOC110936882/LOC110926651/LOC110923437/LOC110940163/LOC110868245/LOC110884124/LOC110935427/LOC110878880/LOC110864264/LOC110904575/LOC110880110/LOC110879978/LOC110865472/LOC110929478/LOC110889328/LOC110928674/LOC110889625/LOC110918798/LOC110921264/LOC110885364/LOC110894845/LOC110910191/LOC110916687/LOC110932380/LOC110878118/LOC110916486/LOC110865703/LOC110878815/LOC110900…	45
BP	GO:0006164	purine nucleotide biosynthetic process	31/1826	109/10514	0.00271638	0.0201012	110891332/110882039/110916150/110897855/110925931/110930517/110911552/110942177/110865716/110935992/110879516/110873594/110912883/110890832/110904915/110893776/110864408/110882734/110864955/110865068/110868960/110898870/novel.4704/110909022/110941521/110908654/110921418/110929796/110895303/110899468/110869292	LOC110891332/LOC110882039/LOC110916150/LOC110897855/LOC110925931/LOC110930517/LOC110911552/LOC110942177/LOC110865716/LOC110935992/LOC110879516/LOC110873594/LOC110912883/LOC110890832/LOC110904915/LOC110893776/LOC110864408/LOC110882734/LOC110864955/LOC110865068/LOC110868960/LOC110898870/-/LOC110909022/LOC110941521/LOC110908654/LOC110921418/LOC110929796/LOC110895303/LOC110899468/LOC110869292	31
MF	GO:0140098	catalytic activity, acting on RNA	53/2723	214/16508	0.00118972	0.0205652	110920890/110886001/110872172/110884133/110886095/110890364/110906664/110884713/110904262/110873449/110871856/110937441/110877764/110918210/110923556/110940340/110910015/110878944/110889804/110890067/110878466/110898585/110929323/110873870/110941918/4055679/110916039/110915327/110941352/110890719/110930199/110894543/110895011/110913055/110871857/110909042/110921564/110879634/110912340/110877480/1…	LOC110920890/LOC110886001/LOC110872172/LOC110884133/LOC110886095/LOC110890364/LOC110906664/LOC110884713/LOC110904262/LOC110873449/LOC110871856/LOC110937441/LOC110877764/LOC110918210/LOC110923556/LOC110940340/LOC110910015/LOC110878944/LOC110889804/LOC110890067/LOC110878466/LOC110898585/LOC110929323/LOC110873870/LOC110941918/rpoB/LOC110916039/LOC110915327/LOC110941352/LOC110890719/LOC110930199/LOC1…	53
CC	GO:0098805	whole membrane	23/757	58/3553	0.00105785	0.0232726	110868057/110940841/110937684/110927132/110898424/110935427/110879233/110864264/110865472/110864745/110921264/110891069/110894845/110911026/110916687/110903972/110916486/110922761/110878075/110916469/110873421/110886069/110872682	LOC110868057/LOC110940841/LOC110937684/LOC110927132/LOC110898424/LOC110935427/LOC110879233/LOC110864264/LOC110865472/LOC110864745/LOC110921264/LOC110891069/LOC110894845/LOC110911026/LOC110916687/LOC110903972/LOC110916486/LOC110922761/LOC110878075/LOC110916469/LOC110873421/LOC110886069/LOC110872682	23
BP	GO:0019359	nicotinamide nucleotide biosynthetic process	22/1826	71/10514	0.00346461	0.024926	110895845/110891332/110882039/110916150/110925931/110930517/110911552/110942177/110865716/110935992/110879516/110912883/110912366/110882734/110878813/110865068/110909022/110867753/110908654/110929796/110899468/110869292	LOC110895845/LOC110891332/LOC110882039/LOC110916150/LOC110925931/LOC110930517/LOC110911552/LOC110942177/LOC110865716/LOC110935992/LOC110879516/LOC110912883/LOC110912366/LOC110882734/LOC110878813/LOC110865068/LOC110909022/LOC110867753/LOC110908654/LOC110929796/LOC110899468/LOC110869292	22
BP	GO:0019363	pyridine nucleotide biosynthetic process	22/1826	71/10514	0.00346461	0.024926	110895845/110891332/110882039/110916150/110925931/110930517/110911552/110942177/110865716/110935992/110879516/110912883/110912366/110882734/110878813/110865068/110909022/110867753/110908654/110929796/110899468/110869292	LOC110895845/LOC110891332/LOC110882039/LOC110916150/LOC110925931/LOC110930517/LOC110911552/LOC110942177/LOC110865716/LOC110935992/LOC110879516/LOC110912883/LOC110912366/LOC110882734/LOC110878813/LOC110865068/LOC110909022/LOC110867753/LOC110908654/LOC110929796/LOC110899468/LOC110869292	22
BP	GO:0071840	cellular component organization or biogenesis	84/1826	367/10514	0.00357867	0.0253497	110921620/110866000/110889895/110941835/110909797/110937012/110895421/110867719/110873705/110898016/110890107/110940841/110894203/110865687/110866533/110940636/110872308/110940771/110898296/110868905/110908649/110866525/110925898/110937684/110935600/110925165/110912806/110908027/110871632/110884272/110916085/110898833/110886423/110915499/110920965/110904486/110944547/110904420/110937481/110928943…	LOC110921620/LOC110866000/LOC110889895/LOC110941835/LOC110909797/LOC110937012/LOC110895421/LOC110867719/LOC110873705/LOC110898016/LOC110890107/LOC110940841/LOC110894203/LOC110865687/LOC110866533/LOC110940636/LOC110872308/LOC110940771/LOC110898296/LOC110868905/LOC110908649/LOC110866525/LOC110925898/LOC110937684/LOC110935600/LOC110925165/LOC110912806/LOC110908027/LOC110871632/LOC110884272/LOC110916…	84
BP	GO:0006399	tRNA metabolic process	33/1826	120/10514	0.00363884	0.0253497	110920890/110886001/110884133/110890364/110906664/110898016/110904262/110912806/110880173/110877764/110908169/110929323/110873870/110890719/110930199/110895011/110931017/110897474/110921564/110879634/110912340/110877480/110878322/110890326/110868906/110878119/110908720/110929145/110895577/110877102/110886359/110869276/110937317	LOC110920890/LOC110886001/LOC110884133/LOC110890364/LOC110906664/LOC110898016/LOC110904262/LOC110912806/LOC110880173/LOC110877764/LOC110908169/LOC110929323/LOC110873870/LOC110890719/LOC110930199/LOC110895011/LOC110931017/LOC110897474/LOC110921564/LOC110879634/LOC110912340/LOC110877480/LOC110878322/LOC110890326/LOC110868906/LOC110878119/LOC110908720/LOC110929145/LOC110895577/LOC110877102/LOC110886…	33
BP	GO:0019362	pyridine nucleotide metabolic process	24/1826	80/10514	0.00371927	0.0253497	110895845/110891332/110882039/110868740/110916150/110925931/110930517/110911552/110942177/110865716/110935992/110879516/110912883/110912366/110882734/110878813/110865068/110871961/110909022/110867753/110908654/110929796/110899468/110869292	LOC110895845/LOC110891332/LOC110882039/LOC110868740/LOC110916150/LOC110925931/LOC110930517/LOC110911552/LOC110942177/LOC110865716/LOC110935992/LOC110879516/LOC110912883/LOC110912366/LOC110882734/LOC110878813/LOC110865068/LOC110871961/LOC110909022/LOC110867753/LOC110908654/LOC110929796/LOC110899468/LOC110869292	24
BP	GO:0046496	nicotinamide nucleotide metabolic process	24/1826	80/10514	0.00371927	0.0253497	110895845/110891332/110882039/110868740/110916150/110925931/110930517/110911552/110942177/110865716/110935992/110879516/110912883/110912366/110882734/110878813/110865068/110871961/110909022/110867753/110908654/110929796/110899468/110869292	LOC110895845/LOC110891332/LOC110882039/LOC110868740/LOC110916150/LOC110925931/LOC110930517/LOC110911552/LOC110942177/LOC110865716/LOC110935992/LOC110879516/LOC110912883/LOC110912366/LOC110882734/LOC110878813/LOC110865068/LOC110871961/LOC110909022/LOC110867753/LOC110908654/LOC110929796/LOC110899468/LOC110869292	24
BP	GO:0006855	drug transmembrane transport	18/1826	55/10514	0.0041128	0.0269675	110936317/110940837/110942400/110872013/110940835/110873542/110917743/110915208/110925643/110878979/110918665/110883783/110928514/110909286/110898053/110915411/110904839/110909287	LOC110936317/LOC110940837/LOC110942400/LOC110872013/LOC110940835/LOC110873542/LOC110917743/LOC110915208/LOC110925643/LOC110878979/LOC110918665/LOC110883783/LOC110928514/LOC110909286/LOC110898053/LOC110915411/LOC110904839/LOC110909287	18
BP	GO:0015893	drug transport	18/1826	55/10514	0.0041128	0.0269675	110936317/110940837/110942400/110872013/110940835/110873542/110917743/110915208/110925643/110878979/110918665/110883783/110928514/110909286/110898053/110915411/110904839/110909287	LOC110936317/LOC110940837/LOC110942400/LOC110872013/LOC110940835/LOC110873542/LOC110917743/LOC110915208/LOC110925643/LOC110878979/LOC110918665/LOC110883783/LOC110928514/LOC110909286/LOC110898053/LOC110915411/LOC110904839/LOC110909287	18
BP	GO:0042493	response to drug	18/1826	55/10514	0.0041128	0.0269675	110936317/110940837/110942400/110872013/110940835/110873542/110917743/110915208/110925643/110878979/110918665/110883783/110928514/110909286/110898053/110915411/110904839/110909287	LOC110936317/LOC110940837/LOC110942400/LOC110872013/LOC110940835/LOC110873542/LOC110917743/LOC110915208/LOC110925643/LOC110878979/LOC110918665/LOC110883783/LOC110928514/LOC110909286/LOC110898053/LOC110915411/LOC110904839/LOC110909287	18
BP	GO:0009132	nucleoside diphosphate metabolic process	21/1826	68/10514	0.00442509	0.0286525	110891332/110882039/110916150/110925931/110930517/110911552/110942177/110865716/110935992/110879516/110873594/110912883/110890832/110882734/110865068/110909022/110908654/110921418/110929796/110899468/110869292	LOC110891332/LOC110882039/LOC110916150/LOC110925931/LOC110930517/LOC110911552/LOC110942177/LOC110865716/LOC110935992/LOC110879516/LOC110873594/LOC110912883/LOC110890832/LOC110882734/LOC110865068/LOC110909022/LOC110908654/LOC110921418/LOC110929796/LOC110899468/LOC110869292	21
BP	GO:0017038	protein import	8/1826	17/10514	0.00448722	0.028696	110921264/110878815/110900076/110922761/110897866/110885461/110917699/110922434	LOC110921264/LOC110878815/LOC110900076/LOC110922761/LOC110897866/LOC110885461/LOC110917699/LOC110922434	8
MF	GO:0140101	catalytic activity, acting on a tRNA	29/2723	103/16508	0.00200104	0.0319429	110920890/110886001/110884133/110890364/110906664/110904262/110877764/110889804/110929323/110873870/110941918/110916039/110941352/110890719/110930199/110895011/110921564/110879634/110912340/110877480/110878322/110890326/110868906/110908720/110929145/110895577/110877102/110869276/110937317	LOC110920890/LOC110886001/LOC110884133/LOC110890364/LOC110906664/LOC110904262/LOC110877764/LOC110889804/LOC110929323/LOC110873870/LOC110941918/LOC110916039/LOC110941352/LOC110890719/LOC110930199/LOC110895011/LOC110921564/LOC110879634/LOC110912340/LOC110877480/LOC110878322/LOC110890326/LOC110868906/LOC110908720/LOC110929145/LOC110895577/LOC110877102/LOC110869276/LOC110937317	29
MF	GO:0016853	isomerase activity	40/2723	155/16508	0.00202393	0.0319429	110909989/110926551/110908072/110904663/110864768/110908411/110920661/110915197/110872723/110885446/110884435/110889182/110911022/110879516/110866525/110864607/110921102/110865976/110904037/110921384/110873843/110927196/110916232/110915330/110903739/110884077/110941794/110871961/110904637/110890643/110891517/110908202/110917293/110928755/110929236/110926316/110941028/110877879/110939570/110885117	LOC110909989/LOC110926551/LOC110908072/LOC110904663/LOC110864768/LOC110908411/LOC110920661/LOC110915197/LOC110872723/LOC110885446/LOC110884435/LOC110889182/LOC110911022/LOC110879516/LOC110866525/LOC110864607/LOC110921102/LOC110865976/LOC110904037/LOC110921384/LOC110873843/LOC110927196/LOC110916232/LOC110915330/LOC110903739/LOC110884077/LOC110941794/LOC110871961/LOC110904637/LOC110890643/LOC110891…	40
BP	GO:0034470	ncRNA processing	23/1826	78/10514	0.00562857	0.0355561	110921620/110866000/110909797/110895421/110867719/110898016/110904262/110890107/110912806/110880173/110904486/110937481/110908169/110937141/110873870/110912356/110931017/110897474/110878322/110878119/110877102/110886359/110937317	LOC110921620/LOC110866000/LOC110909797/LOC110895421/LOC110867719/LOC110898016/LOC110904262/LOC110890107/LOC110912806/LOC110880173/LOC110904486/LOC110937481/LOC110908169/LOC110937141/LOC110873870/LOC110912356/LOC110931017/LOC110897474/LOC110878322/LOC110878119/LOC110877102/LOC110886359/LOC110937317	23
MF	GO:0001883	purine nucleoside binding	57/2723	242/16508	0.00274395	0.0355734	110890116/110929286/110918447/110886882/110885522/110904321/110943384/110898385/110871064/110915439/110878606/110885200/110898686/110865522/110889304/110941204/110937425/110920709/110886767/110886695/110920428/110904411/110930590/110920409/110918093/110868526/110936510/110937638/110889751/110897414/110927094/110883839/110911938/110941422/110910191/110926232/110864955/110921721/110897627/110923304…	LOC110890116/LOC110929286/LOC110918447/LOC110886882/LOC110885522/LOC110904321/LOC110943384/LOC110898385/LOC110871064/LOC110915439/LOC110878606/LOC110885200/LOC110898686/LOC110865522/LOC110889304/LOC110941204/LOC110937425/LOC110920709/LOC110886767/LOC110886695/LOC110920428/LOC110904411/LOC110930590/LOC110920409/LOC110918093/LOC110868526/LOC110936510/LOC110937638/LOC110889751/LOC110897414/LOC110927…	57
MF	GO:0005525	GTP binding	57/2723	242/16508	0.00274395	0.0355734	110890116/110929286/110918447/110886882/110885522/110904321/110943384/110898385/110871064/110915439/110878606/110885200/110898686/110865522/110889304/110941204/110937425/110920709/110886767/110886695/110920428/110904411/110930590/110920409/110918093/110868526/110936510/110937638/110889751/110897414/110927094/110883839/110911938/110941422/110910191/110926232/110864955/110921721/110897627/110923304…	LOC110890116/LOC110929286/LOC110918447/LOC110886882/LOC110885522/LOC110904321/LOC110943384/LOC110898385/LOC110871064/LOC110915439/LOC110878606/LOC110885200/LOC110898686/LOC110865522/LOC110889304/LOC110941204/LOC110937425/LOC110920709/LOC110886767/LOC110886695/LOC110920428/LOC110904411/LOC110930590/LOC110920409/LOC110918093/LOC110868526/LOC110936510/LOC110937638/LOC110889751/LOC110897414/LOC110927…	57
MF	GO:0032549	ribonucleoside binding	57/2723	242/16508	0.00274395	0.0355734	110890116/110929286/110918447/110886882/110885522/110904321/110943384/110898385/110871064/110915439/110878606/110885200/110898686/110865522/110889304/110941204/110937425/110920709/110886767/110886695/110920428/110904411/110930590/110920409/110918093/110868526/110936510/110937638/110889751/110897414/110927094/110883839/110911938/110941422/110910191/110926232/110864955/110921721/110897627/110923304…	LOC110890116/LOC110929286/LOC110918447/LOC110886882/LOC110885522/LOC110904321/LOC110943384/LOC110898385/LOC110871064/LOC110915439/LOC110878606/LOC110885200/LOC110898686/LOC110865522/LOC110889304/LOC110941204/LOC110937425/LOC110920709/LOC110886767/LOC110886695/LOC110920428/LOC110904411/LOC110930590/LOC110920409/LOC110918093/LOC110868526/LOC110936510/LOC110937638/LOC110889751/LOC110897414/LOC110927…	57
MF	GO:0032550	purine ribonucleoside binding	57/2723	242/16508	0.00274395	0.0355734	110890116/110929286/110918447/110886882/110885522/110904321/110943384/110898385/110871064/110915439/110878606/110885200/110898686/110865522/110889304/110941204/110937425/110920709/110886767/110886695/110920428/110904411/110930590/110920409/110918093/110868526/110936510/110937638/110889751/110897414/110927094/110883839/110911938/110941422/110910191/110926232/110864955/110921721/110897627/110923304…	LOC110890116/LOC110929286/LOC110918447/LOC110886882/LOC110885522/LOC110904321/LOC110943384/LOC110898385/LOC110871064/LOC110915439/LOC110878606/LOC110885200/LOC110898686/LOC110865522/LOC110889304/LOC110941204/LOC110937425/LOC110920709/LOC110886767/LOC110886695/LOC110920428/LOC110904411/LOC110930590/LOC110920409/LOC110918093/LOC110868526/LOC110936510/LOC110937638/LOC110889751/LOC110897414/LOC110927…	57
MF	GO:0032561	guanyl ribonucleotide binding	57/2723	242/16508	0.00274395	0.0355734	110890116/110929286/110918447/110886882/110885522/110904321/110943384/110898385/110871064/110915439/110878606/110885200/110898686/110865522/110889304/110941204/110937425/110920709/110886767/110886695/110920428/110904411/110930590/110920409/110918093/110868526/110936510/110937638/110889751/110897414/110927094/110883839/110911938/110941422/110910191/110926232/110864955/110921721/110897627/110923304…	LOC110890116/LOC110929286/LOC110918447/LOC110886882/LOC110885522/LOC110904321/LOC110943384/LOC110898385/LOC110871064/LOC110915439/LOC110878606/LOC110885200/LOC110898686/LOC110865522/LOC110889304/LOC110941204/LOC110937425/LOC110920709/LOC110886767/LOC110886695/LOC110920428/LOC110904411/LOC110930590/LOC110920409/LOC110918093/LOC110868526/LOC110936510/LOC110937638/LOC110889751/LOC110897414/LOC110927…	57
MF	GO:0001882	nucleoside binding	57/2723	243/16508	0.00302117	0.0378167	110890116/110929286/110918447/110886882/110885522/110904321/110943384/110898385/110871064/110915439/110878606/110885200/110898686/110865522/110889304/110941204/110937425/110920709/110886767/110886695/110920428/110904411/110930590/110920409/110918093/110868526/110936510/110937638/110889751/110897414/110927094/110883839/110911938/110941422/110910191/110926232/110864955/110921721/110897627/110923304…	LOC110890116/LOC110929286/LOC110918447/LOC110886882/LOC110885522/LOC110904321/LOC110943384/LOC110898385/LOC110871064/LOC110915439/LOC110878606/LOC110885200/LOC110898686/LOC110865522/LOC110889304/LOC110941204/LOC110937425/LOC110920709/LOC110886767/LOC110886695/LOC110920428/LOC110904411/LOC110930590/LOC110920409/LOC110918093/LOC110868526/LOC110936510/LOC110937638/LOC110889751/LOC110897414/LOC110927…	57
BP	GO:0071702	organic substance transport	55/1826	229/10514	0.00606338	0.0378414	110878653/110885911/110920081/110929210/110868931/110927242/110922034/110936882/110863868/110926651/110927292/110920686/110923437/110940163/110915881/110868245/110884124/110935427/110878880/110864264/110904575/110880110/110879978/110865472/110929478/110889328/110928674/110889625/110918798/110921264/110885364/110894845/110910191/110916687/110932380/110878118/110916486/110865703/110878815/110900076…	LOC110878653/LOC110885911/LOC110920081/LOC110929210/LOC110868931/LOC110927242/LOC110922034/LOC110936882/LOC110863868/LOC110926651/LOC110927292/LOC110920686/LOC110923437/LOC110940163/LOC110915881/LOC110868245/LOC110884124/LOC110935427/LOC110878880/LOC110864264/LOC110904575/LOC110880110/LOC110879978/LOC110865472/LOC110929478/LOC110889328/LOC110928674/LOC110889625/LOC110918798/LOC110921264/LOC110885…	55
BP	GO:0016052	carbohydrate catabolic process	24/1826	83/10514	0.0062085	0.0382858	110909989/110891332/110882039/110916150/110925931/110884435/110930517/110911552/110942177/110865716/110935992/110879516/110912883/110942115/110899790/110882734/110865068/110918860/110941794/110909022/110908654/110929796/110899468/110869292	LOC110909989/LOC110891332/LOC110882039/LOC110916150/LOC110925931/LOC110884435/LOC110930517/LOC110911552/LOC110942177/LOC110865716/LOC110935992/LOC110879516/LOC110912883/LOC110942115/LOC110899790/LOC110882734/LOC110865068/LOC110918860/LOC110941794/LOC110909022/LOC110908654/LOC110929796/LOC110899468/LOC110869292	24
BP	GO:0044272	sulfur compound biosynthetic process	10/1826	25/10514	0.00635374	0.0387205	110941174/110910129/110897428/110898236/110868285/110898235/110915097/110868496/110929779/110904332	LOC110941174/LOC110910129/LOC110897428/LOC110898236/LOC110868285/LOC110898235/LOC110915097/LOC110868496/LOC110929779/LOC110904332	10
BP	GO:0009152	purine ribonucleotide biosynthetic process	29/1826	106/10514	0.00665435	0.0391699	110891332/110882039/110916150/110897855/110925931/110930517/110911552/110942177/110865716/110935992/110879516/110873594/110912883/110890832/110904915/110893776/110864408/110882734/110865068/110868960/novel.4704/110909022/110941521/110908654/110921418/110929796/110895303/110899468/110869292	LOC110891332/LOC110882039/LOC110916150/LOC110897855/LOC110925931/LOC110930517/LOC110911552/LOC110942177/LOC110865716/LOC110935992/LOC110879516/LOC110873594/LOC110912883/LOC110890832/LOC110904915/LOC110893776/LOC110864408/LOC110882734/LOC110865068/LOC110868960/-/LOC110909022/LOC110941521/LOC110908654/LOC110921418/LOC110929796/LOC110895303/LOC110899468/LOC110869292	29
BP	GO:0009260	ribonucleotide biosynthetic process	29/1826	106/10514	0.00665435	0.0391699	110891332/110882039/110916150/110897855/110925931/110930517/110911552/110942177/110865716/110935992/110879516/110873594/110912883/110890832/110904915/110893776/110864408/110882734/110865068/110868960/novel.4704/110909022/110941521/110908654/110921418/110929796/110895303/110899468/110869292	LOC110891332/LOC110882039/LOC110916150/LOC110897855/LOC110925931/LOC110930517/LOC110911552/LOC110942177/LOC110865716/LOC110935992/LOC110879516/LOC110873594/LOC110912883/LOC110890832/LOC110904915/LOC110893776/LOC110864408/LOC110882734/LOC110865068/LOC110868960/-/LOC110909022/LOC110941521/LOC110908654/LOC110921418/LOC110929796/LOC110895303/LOC110899468/LOC110869292	29
BP	GO:0046390	ribose phosphate biosynthetic process	29/1826	106/10514	0.00665435	0.0391699	110891332/110882039/110916150/110897855/110925931/110930517/110911552/110942177/110865716/110935992/110879516/110873594/110912883/110890832/110904915/110893776/110864408/110882734/110865068/110868960/novel.4704/110909022/110941521/110908654/110921418/110929796/110895303/110899468/110869292	LOC110891332/LOC110882039/LOC110916150/LOC110897855/LOC110925931/LOC110930517/LOC110911552/LOC110942177/LOC110865716/LOC110935992/LOC110879516/LOC110873594/LOC110912883/LOC110890832/LOC110904915/LOC110893776/LOC110864408/LOC110882734/LOC110865068/LOC110868960/-/LOC110909022/LOC110941521/LOC110908654/LOC110921418/LOC110929796/LOC110895303/LOC110899468/LOC110869292	29
BP	GO:0006733	oxidoreduction coenzyme metabolic process	24/1826	84/10514	0.00729468	0.0424567	110895845/110891332/110882039/110868740/110916150/110925931/110930517/110911552/110942177/110865716/110935992/110879516/110912883/110912366/110882734/110878813/110865068/110871961/110909022/110867753/110908654/110929796/110899468/110869292	LOC110895845/LOC110891332/LOC110882039/LOC110868740/LOC110916150/LOC110925931/LOC110930517/LOC110911552/LOC110942177/LOC110865716/LOC110935992/LOC110879516/LOC110912883/LOC110912366/LOC110882734/LOC110878813/LOC110865068/LOC110871961/LOC110909022/LOC110867753/LOC110908654/LOC110929796/LOC110899468/LOC110869292	24
MF	GO:0004812	aminoacyl-tRNA ligase activity	20/2723	66/16508	0.0037998	0.0444944	110920890/110886001/110884133/110890364/110906664/110877764/110929323/110890719/110930199/110895011/110921564/110879634/110912340/110877480/110890326/110868906/110908720/110929145/110895577/110869276	LOC110920890/LOC110886001/LOC110884133/LOC110890364/LOC110906664/LOC110877764/LOC110929323/LOC110890719/LOC110930199/LOC110895011/LOC110921564/LOC110879634/LOC110912340/LOC110877480/LOC110890326/LOC110868906/LOC110908720/LOC110929145/LOC110895577/LOC110869276	20
MF	GO:0016875	ligase activity, forming carbon-oxygen bonds	20/2723	66/16508	0.0037998	0.0444944	110920890/110886001/110884133/110890364/110906664/110877764/110929323/110890719/110930199/110895011/110921564/110879634/110912340/110877480/110890326/110868906/110908720/110929145/110895577/110869276	LOC110920890/LOC110886001/LOC110884133/LOC110890364/LOC110906664/LOC110877764/LOC110929323/LOC110890719/LOC110930199/LOC110895011/LOC110921564/LOC110879634/LOC110912340/LOC110877480/LOC110890326/LOC110868906/LOC110908720/LOC110929145/LOC110895577/LOC110869276	20
BP	GO:0016226	iron-sulfur cluster assembly	7/1826	15/10514	0.00828286	0.0465467	110868905/110884272/110944547/110885074/110915949/110864535/110920573	LOC110868905/LOC110884272/LOC110944547/LOC110885074/LOC110915949/LOC110864535/LOC110920573	7
BP	GO:0031163	metallo-sulfur cluster assembly	7/1826	15/10514	0.00828286	0.0465467	110868905/110884272/110944547/110885074/110915949/110864535/110920573	LOC110868905/LOC110884272/LOC110944547/LOC110885074/LOC110915949/LOC110864535/LOC110920573	7
BP	GO:0008652	cellular amino acid biosynthetic process	22/1826	76/10514	0.00844761	0.0465467	110919696/110883802/110942378/110904216/110928848/110898236/110913018/110926857/110941716/110898235/110873272/110877928/110941290/110868496/110909005/110929779/110873597/110904332/110928719/110928670/110868826/110925756	LOC110919696/LOC110883802/LOC110942378/LOC110904216/LOC110928848/LOC110898236/LOC110913018/LOC110926857/LOC110941716/LOC110898235/LOC110873272/LOC110877928/LOC110941290/LOC110868496/LOC110909005/LOC110929779/LOC110873597/LOC110904332/LOC110928719/LOC110928670/LOC110868826/LOC110925756	22
BP	GO:0006418	tRNA aminoacylation for protein translation	19/1826	63/10514	0.00870854	0.0465467	110920890/110886001/110884133/110890364/110906664/110877764/110929323/110890719/110930199/110895011/110921564/110879634/110912340/110877480/110890326/110868906/110929145/110895577/110869276	LOC110920890/LOC110886001/LOC110884133/LOC110890364/LOC110906664/LOC110877764/LOC110929323/LOC110890719/LOC110930199/LOC110895011/LOC110921564/LOC110879634/LOC110912340/LOC110877480/LOC110890326/LOC110868906/LOC110929145/LOC110895577/LOC110869276	19
BP	GO:0046434	organophosphate catabolic process	19/1826	63/10514	0.00870854	0.0465467	110891332/110882039/110916150/110925931/110930517/110911552/110942177/110865716/110935992/110879516/110912883/110878373/110882734/110865068/110909022/110908654/110929796/110899468/110869292	LOC110891332/LOC110882039/LOC110916150/LOC110925931/LOC110930517/LOC110911552/LOC110942177/LOC110865716/LOC110935992/LOC110879516/LOC110912883/LOC110878373/LOC110882734/LOC110865068/LOC110909022/LOC110908654/LOC110929796/LOC110899468/LOC110869292	19
BP	GO:0006096	glycolytic process	18/1826	59/10514	0.00925542	0.0465467	110891332/110882039/110916150/110925931/110930517/110911552/110942177/110865716/110935992/110879516/110912883/110882734/110865068/110909022/110908654/110929796/110899468/110869292	LOC110891332/LOC110882039/LOC110916150/LOC110925931/LOC110930517/LOC110911552/LOC110942177/LOC110865716/LOC110935992/LOC110879516/LOC110912883/LOC110882734/LOC110865068/LOC110909022/LOC110908654/LOC110929796/LOC110899468/LOC110869292	18
BP	GO:0006757	ATP generation from ADP	18/1826	59/10514	0.00925542	0.0465467	110891332/110882039/110916150/110925931/110930517/110911552/110942177/110865716/110935992/110879516/110912883/110882734/110865068/110909022/110908654/110929796/110899468/110869292	LOC110891332/LOC110882039/LOC110916150/LOC110925931/LOC110930517/LOC110911552/LOC110942177/LOC110865716/LOC110935992/LOC110879516/LOC110912883/LOC110882734/LOC110865068/LOC110909022/LOC110908654/LOC110929796/LOC110899468/LOC110869292	18
BP	GO:0009135	purine nucleoside diphosphate metabolic process	18/1826	59/10514	0.00925542	0.0465467	110891332/110882039/110916150/110925931/110930517/110911552/110942177/110865716/110935992/110879516/110912883/110882734/110865068/110909022/110908654/110929796/110899468/110869292	LOC110891332/LOC110882039/LOC110916150/LOC110925931/LOC110930517/LOC110911552/LOC110942177/LOC110865716/LOC110935992/LOC110879516/LOC110912883/LOC110882734/LOC110865068/LOC110909022/LOC110908654/LOC110929796/LOC110899468/LOC110869292	18
BP	GO:0009166	nucleotide catabolic process	18/1826	59/10514	0.00925542	0.0465467	110891332/110882039/110916150/110925931/110930517/110911552/110942177/110865716/110935992/110879516/110912883/110882734/110865068/110909022/110908654/110929796/110899468/110869292	LOC110891332/LOC110882039/LOC110916150/LOC110925931/LOC110930517/LOC110911552/LOC110942177/LOC110865716/LOC110935992/LOC110879516/LOC110912883/LOC110882734/LOC110865068/LOC110909022/LOC110908654/LOC110929796/LOC110899468/LOC110869292	18
BP	GO:0009179	purine ribonucleoside diphosphate metabolic process	18/1826	59/10514	0.00925542	0.0465467	110891332/110882039/110916150/110925931/110930517/110911552/110942177/110865716/110935992/110879516/110912883/110882734/110865068/110909022/110908654/110929796/110899468/110869292	LOC110891332/LOC110882039/LOC110916150/LOC110925931/LOC110930517/LOC110911552/LOC110942177/LOC110865716/LOC110935992/LOC110879516/LOC110912883/LOC110882734/LOC110865068/LOC110909022/LOC110908654/LOC110929796/LOC110899468/LOC110869292	18
BP	GO:0009185	ribonucleoside diphosphate metabolic process	18/1826	59/10514	0.00925542	0.0465467	110891332/110882039/110916150/110925931/110930517/110911552/110942177/110865716/110935992/110879516/110912883/110882734/110865068/110909022/110908654/110929796/110899468/110869292	LOC110891332/LOC110882039/LOC110916150/LOC110925931/LOC110930517/LOC110911552/LOC110942177/LOC110865716/LOC110935992/LOC110879516/LOC110912883/LOC110882734/LOC110865068/LOC110909022/LOC110908654/LOC110929796/LOC110899468/LOC110869292	18
BP	GO:0042866	pyruvate biosynthetic process	18/1826	59/10514	0.00925542	0.0465467	110891332/110882039/110916150/110925931/110930517/110911552/110942177/110865716/110935992/110879516/110912883/110882734/110865068/110909022/110908654/110929796/110899468/110869292	LOC110891332/LOC110882039/LOC110916150/LOC110925931/LOC110930517/LOC110911552/LOC110942177/LOC110865716/LOC110935992/LOC110879516/LOC110912883/LOC110882734/LOC110865068/LOC110909022/LOC110908654/LOC110929796/LOC110899468/LOC110869292	18
BP	GO:0046031	ADP metabolic process	18/1826	59/10514	0.00925542	0.0465467	110891332/110882039/110916150/110925931/110930517/110911552/110942177/110865716/110935992/110879516/110912883/110882734/110865068/110909022/110908654/110929796/110899468/110869292	LOC110891332/LOC110882039/LOC110916150/LOC110925931/LOC110930517/LOC110911552/LOC110942177/LOC110865716/LOC110935992/LOC110879516/LOC110912883/LOC110882734/LOC110865068/LOC110909022/LOC110908654/LOC110929796/LOC110899468/LOC110869292	18
BP	GO:1901292	nucleoside phosphate catabolic process	18/1826	59/10514	0.00925542	0.0465467	110891332/110882039/110916150/110925931/110930517/110911552/110942177/110865716/110935992/110879516/110912883/110882734/110865068/110909022/110908654/110929796/110899468/110869292	LOC110891332/LOC110882039/LOC110916150/LOC110925931/LOC110930517/LOC110911552/LOC110942177/LOC110865716/LOC110935992/LOC110879516/LOC110912883/LOC110882734/LOC110865068/LOC110909022/LOC110908654/LOC110929796/LOC110899468/LOC110869292	18

## Sheet: L2 VS L1
L2 VS L1 up
Category	GO ID	Description	Gene Ratio	Bg Ratio	pvalue	padj	Gene ID	Gene Name	Count
MF	GO:0003735	structural constituent of ribosome	101/1526	331/16956	2.28907e-29	7.07322e-27	110884024/110895862/110874680/110910897/110889737/110905027/110868918/110868207/110940241/110915921/110916515/110896046/110864948/110937522/110864975/110873629/110940663/110864225/110937790/110895119/110911597/110870624/110879625/110895454/110937753/110936525/110943710/110895947/110889794/110889062/110884280/110917938/110904709/110915789/110936430/110926438/110920804/110937379/110942292/110909340…	LOC110884024/LOC110895862/LOC110874680/LOC110910897/LOC110889737/LOC110905027/LOC110868918/LOC110868207/LOC110940241/LOC110915921/LOC110916515/LOC110896046/LOC110864948/LOC110937522/LOC110864975/LOC110873629/LOC110940663/LOC110864225/LOC110937790/LOC110895119/LOC110911597/LOC110870624/LOC110879625/LOC110895454/LOC110937753/LOC110936525/LOC110943710/LOC110895947/LOC110889794/LOC110889062/LOC110884…	101
CC	GO:0005840	ribosome	102/375	326/3608	2.15828e-28	2.41728e-26	110884024/110895862/110874680/110910897/110889737/110905027/110868918/110868207/110940241/110915921/110916515/110896046/110864948/110937522/110864975/110873629/110940663/110864225/110937790/110895119/110911597/110870624/110879625/110895454/110937753/110936525/110943710/110895947/110889794/110889062/110884280/110917938/110904709/110915789/110936430/110926438/110920804/110937379/110942292/110909340…	LOC110884024/LOC110895862/LOC110874680/LOC110910897/LOC110889737/LOC110905027/LOC110868918/LOC110868207/LOC110940241/LOC110915921/LOC110916515/LOC110896046/LOC110864948/LOC110937522/LOC110864975/LOC110873629/LOC110940663/LOC110864225/LOC110937790/LOC110895119/LOC110911597/LOC110870624/LOC110879625/LOC110895454/LOC110937753/LOC110936525/LOC110943710/LOC110895947/LOC110889794/LOC110889062/LOC110884…	102
CC	GO:1990904	ribonucleoprotein complex	106/375	359/3608	3.53097e-27	1.97735e-25	110884024/110895862/110874680/110866000/110910897/110889737/110905027/110868918/110868207/110940241/110915921/110916515/110896046/110864948/110937522/110864975/110873629/110940663/110864225/110937790/110922126/110895119/110911597/110870624/110879625/110895454/110937753/110936525/110909797/110943710/110895947/110889794/110889062/110884280/110917938/110904709/110915789/110936430/110926438/110920804…	LOC110884024/LOC110895862/LOC110874680/LOC110866000/LOC110910897/LOC110889737/LOC110905027/LOC110868918/LOC110868207/LOC110940241/LOC110915921/LOC110916515/LOC110896046/LOC110864948/LOC110937522/LOC110864975/LOC110873629/LOC110940663/LOC110864225/LOC110937790/LOC110922126/LOC110895119/LOC110911597/LOC110870624/LOC110879625/LOC110895454/LOC110937753/LOC110936525/LOC110909797/LOC110943710/LOC110895…	106
MF	GO:0005198	structural molecule activity	102/1526	355/16956	2.72672e-27	4.21278e-25	110884024/110895862/110926651/110874680/110910897/110889737/110905027/110868918/110868207/110940241/110915921/110916515/110896046/110864948/110937522/110864975/110873629/110940663/110864225/110937790/110895119/110911597/110870624/110879625/110895454/110937753/110936525/110943710/110895947/110889794/110889062/110884280/110917938/110904709/110915789/110936430/110926438/110920804/110937379/110942292…	LOC110884024/LOC110895862/LOC110926651/LOC110874680/LOC110910897/LOC110889737/LOC110905027/LOC110868918/LOC110868207/LOC110940241/LOC110915921/LOC110916515/LOC110896046/LOC110864948/LOC110937522/LOC110864975/LOC110873629/LOC110940663/LOC110864225/LOC110937790/LOC110895119/LOC110911597/LOC110870624/LOC110879625/LOC110895454/LOC110937753/LOC110936525/LOC110943710/LOC110895947/LOC110889794/LOC110889…	102
BP	GO:0006412	translation	114/1099	454/10783	8.4304e-21	1.98754e-18	110920890/110920796/110884024/110895862/110874680/110890364/110910897/110889737/110905027/110868918/110868207/110940241/110915921/110916515/110896046/110885309/110864948/110937522/110864975/110873629/110940663/110864225/110935600/110937790/110895119/110911597/110870624/110879625/110895454/110937753/110936525/110943710/110895947/110889794/110889062/110884280/110917938/110884133/110904709/110915789…	LOC110920890/LOC110920796/LOC110884024/LOC110895862/LOC110874680/LOC110890364/LOC110910897/LOC110889737/LOC110905027/LOC110868918/LOC110868207/LOC110940241/LOC110915921/LOC110916515/LOC110896046/LOC110885309/LOC110864948/LOC110937522/LOC110864975/LOC110873629/LOC110940663/LOC110864225/LOC110935600/LOC110937790/LOC110895119/LOC110911597/LOC110870624/LOC110879625/LOC110895454/LOC110937753/LOC110936…	114
BP	GO:0043604	amide biosynthetic process	117/1099	473/10783	9.26594e-21	1.98754e-18	110920890/110920796/110884024/110895862/110874680/110890364/110910897/110889737/110905027/110868918/110868207/110940241/110915921/110916515/110896046/110885309/110864948/110937522/110864975/110873629/110940663/110864225/110935600/110937790/110937667/110895119/110911597/110870624/110879625/110895454/110937753/110936525/110943710/110895947/110889794/110889062/110884280/110917938/110884133/110904709…	LOC110920890/LOC110920796/LOC110884024/LOC110895862/LOC110874680/LOC110890364/LOC110910897/LOC110889737/LOC110905027/LOC110868918/LOC110868207/LOC110940241/LOC110915921/LOC110916515/LOC110896046/LOC110885309/LOC110864948/LOC110937522/LOC110864975/LOC110873629/LOC110940663/LOC110864225/LOC110935600/LOC110937790/LOC110937667/LOC110895119/LOC110911597/LOC110870624/LOC110879625/LOC110895454/LOC110937…	117
CC	GO:0043228	non-membrane-bounded organelle	108/375	447/3608	7.72641e-20	2.16339e-18	110867560/110877340/110884024/110895862/110874680/110910897/110889737/110905027/110868918/110868207/110940241/110915921/110916515/110896046/110864948/110937522/110864975/110873629/110940663/110864225/110937790/110873682/110895119/110911597/110870624/110879625/110895454/110937753/110936525/110909797/110943710/110895947/110903739/110889794/110889062/110884280/110917938/110904709/110915789/110936430…	LOC110867560/LOC110877340/LOC110884024/LOC110895862/LOC110874680/LOC110910897/LOC110889737/LOC110905027/LOC110868918/LOC110868207/LOC110940241/LOC110915921/LOC110916515/LOC110896046/LOC110864948/LOC110937522/LOC110864975/LOC110873629/LOC110940663/LOC110864225/LOC110937790/LOC110873682/LOC110895119/LOC110911597/LOC110870624/LOC110879625/LOC110895454/LOC110937753/LOC110936525/LOC110909797/LOC110943…	108
CC	GO:0043232	intracellular non-membrane-bounded organelle	108/375	447/3608	7.72641e-20	2.16339e-18	110867560/110877340/110884024/110895862/110874680/110910897/110889737/110905027/110868918/110868207/110940241/110915921/110916515/110896046/110864948/110937522/110864975/110873629/110940663/110864225/110937790/110873682/110895119/110911597/110870624/110879625/110895454/110937753/110936525/110909797/110943710/110895947/110903739/110889794/110889062/110884280/110917938/110904709/110915789/110936430…	LOC110867560/LOC110877340/LOC110884024/LOC110895862/LOC110874680/LOC110910897/LOC110889737/LOC110905027/LOC110868918/LOC110868207/LOC110940241/LOC110915921/LOC110916515/LOC110896046/LOC110864948/LOC110937522/LOC110864975/LOC110873629/LOC110940663/LOC110864225/LOC110937790/LOC110873682/LOC110895119/LOC110911597/LOC110870624/LOC110879625/LOC110895454/LOC110937753/LOC110936525/LOC110909797/LOC110943…	108
BP	GO:0043043	peptide biosynthetic process	114/1099	459/10783	2.15903e-20	3.08741e-18	110920890/110920796/110884024/110895862/110874680/110890364/110910897/110889737/110905027/110868918/110868207/110940241/110915921/110916515/110896046/110885309/110864948/110937522/110864975/110873629/110940663/110864225/110935600/110937790/110895119/110911597/110870624/110879625/110895454/110937753/110936525/110943710/110895947/110889794/110889062/110884280/110917938/110884133/110904709/110915789…	LOC110920890/LOC110920796/LOC110884024/LOC110895862/LOC110874680/LOC110890364/LOC110910897/LOC110889737/LOC110905027/LOC110868918/LOC110868207/LOC110940241/LOC110915921/LOC110916515/LOC110896046/LOC110885309/LOC110864948/LOC110937522/LOC110864975/LOC110873629/LOC110940663/LOC110864225/LOC110935600/LOC110937790/LOC110895119/LOC110911597/LOC110870624/LOC110879625/LOC110895454/LOC110937753/LOC110936…	114
BP	GO:0006518	peptide metabolic process	114/1099	467/10783	9.36257e-20	9.9177e-18	110920890/110920796/110884024/110895862/110874680/110890364/110910897/110889737/110905027/110868918/110868207/110940241/110915921/110916515/110896046/110885309/110864948/110937522/110864975/110873629/110940663/110864225/110935600/110937790/110895119/110911597/110870624/110879625/110895454/110937753/110936525/110943710/110895947/110889794/110889062/110884280/110917938/110884133/110904709/110915789…	LOC110920890/LOC110920796/LOC110884024/LOC110895862/LOC110874680/LOC110890364/LOC110910897/LOC110889737/LOC110905027/LOC110868918/LOC110868207/LOC110940241/LOC110915921/LOC110916515/LOC110896046/LOC110885309/LOC110864948/LOC110937522/LOC110864975/LOC110873629/LOC110940663/LOC110864225/LOC110935600/LOC110937790/LOC110895119/LOC110911597/LOC110870624/LOC110879625/LOC110895454/LOC110937753/LOC110936…	114
BP	GO:0043603	cellular amide metabolic process	117/1099	487/10783	1.15591e-19	9.9177e-18	110920890/110920796/110884024/110895862/110874680/110890364/110910897/110889737/110905027/110868918/110868207/110940241/110915921/110916515/110896046/110885309/110864948/110937522/110864975/110873629/110940663/110864225/110935600/110937790/110937667/110895119/110911597/110870624/110879625/110895454/110937753/110936525/110943710/110895947/110889794/110889062/110884280/110917938/110884133/110904709…	LOC110920890/LOC110920796/LOC110884024/LOC110895862/LOC110874680/LOC110890364/LOC110910897/LOC110889737/LOC110905027/LOC110868918/LOC110868207/LOC110940241/LOC110915921/LOC110916515/LOC110896046/LOC110885309/LOC110864948/LOC110937522/LOC110864975/LOC110873629/LOC110940663/LOC110864225/LOC110935600/LOC110937790/LOC110937667/LOC110895119/LOC110911597/LOC110870624/LOC110879625/LOC110895454/LOC110937…	117
BP	GO:0042254	ribosome biogenesis	18/1099	55/10783	4.50427e-06	0.000322056	110866000/110865687/110898296/110867719/110908027/110925898/110909797/110909001/110872308/110904420/110937012/110912806/110928943/110865918/110898016/110869094/110937141/110895421	LOC110866000/LOC110865687/LOC110898296/LOC110867719/LOC110908027/LOC110925898/LOC110909797/LOC110909001/LOC110872308/LOC110904420/LOC110937012/LOC110912806/LOC110928943/LOC110865918/LOC110898016/LOC110869094/LOC110937141/LOC110895421	18
BP	GO:0022613	ribonucleoprotein complex biogenesis	18/1099	59/10783	1.36301e-05	0.000835331	110866000/110865687/110898296/110867719/110908027/110925898/110909797/110909001/110872308/110904420/110937012/110912806/110928943/110865918/110898016/110869094/110937141/110895421	LOC110866000/LOC110865687/LOC110898296/LOC110867719/LOC110908027/LOC110925898/LOC110909797/LOC110909001/LOC110872308/LOC110904420/LOC110937012/LOC110912806/LOC110928943/LOC110865918/LOC110898016/LOC110869094/LOC110937141/LOC110895421	18
MF	GO:0043565	sequence-specific DNA binding	52/1526	314/16956	1.1832e-05	0.0012187	110904963/110877782/110912512/110877858/110912248/110899133/110893781/110915567/110910002/110939612/110868000/110928576/110889853/110889385/110942320/110898577/110921362/110935899/110929937/110864423/110915516/110907992/110926043/110879036/110922794/110884382/110893740/110911528/110880169/110915267/110868001/110928464/110897411/110898331/110895203/110910044/110886909/110872305/110895426/110865842…	LOC110904963/LOC110877782/LOC110912512/LOC110877858/LOC110912248/LOC110899133/LOC110893781/LOC110915567/LOC110910002/LOC110939612/LOC110868000/LOC110928576/LOC110889853/LOC110889385/LOC110942320/LOC110898577/LOC110921362/LOC110935899/LOC110929937/LOC110864423/LOC110915516/LOC110907992/LOC110926043/LOC110879036/LOC110922794/LOC110884382/LOC110893740/LOC110911528/LOC110880169/LOC110915267/LOC110868…	52
CC	GO:0005576	extracellular region	16/375	62/3608	0.0004101	0.00918623	110900148/110927034/110889990/110889988/110889986/110877538/110889985/110889989/110898081/110879257/110896101/110940225/110940220/110925995/110940221/110922637	LOC110900148/LOC110927034/LOC110889990/LOC110889988/LOC110889986/LOC110877538/LOC110889985/LOC110889989/LOC110898081/LOC110879257/LOC110896101/LOC110940225/LOC110940220/LOC110925995/LOC110940221/LOC110922637	16
CC	GO:0048046	apoplast	12/375	42/3608	0.000812489	0.0151665	110927034/110889990/110889988/110889986/110877538/110889985/110889989/110940225/110940220/110925995/110940221/110922637	LOC110927034/LOC110889990/LOC110889988/LOC110889986/LOC110877538/LOC110889985/LOC110889989/LOC110940225/LOC110940220/LOC110925995/LOC110940221/LOC110922637	12
MF	GO:0016762	xyloglucan:xyloglucosyl transferase activity	12/1526	42/16956	0.000231732	0.0179013	110927034/110889990/110889988/110889986/110877538/110889985/110889989/110940225/110940220/110925995/110940221/110922637	LOC110927034/LOC110889990/LOC110889988/LOC110889986/LOC110877538/LOC110889985/LOC110889989/LOC110940225/LOC110940220/LOC110925995/LOC110940221/LOC110922637	12
MF	GO:0003723	RNA binding	54/1526	374/16956	0.00034462	0.0212975	110920796/novel.2692/110884986/110944814/110904262/110936616/110910268/110877568/110886218/110921081/110873805/110909884/110935600/110878616/110911451/110911597/110930401/110884473/110903700/110884280/110912112/110916994/110908314/110941204/110867909/110899194/110890420/110885476/110941192/110908930/110915783/110873177/110893899/110912806/110923556/110911168/110920602/110929068/110864922/11087998…	LOC110920796/-/LOC110884986/LOC110944814/LOC110904262/LOC110936616/LOC110910268/LOC110877568/LOC110886218/LOC110921081/LOC110873805/LOC110909884/LOC110935600/LOC110878616/LOC110911451/LOC110911597/LOC110930401/LOC110884473/LOC110903700/LOC110884280/LOC110912112/LOC110916994/LOC110908314/LOC110941204/LOC110867909/LOC110899194/LOC110890420/LOC110885476/LOC110941192/LOC110908930/LOC110915783/LOC1108…	54
MF	GO:0016758	transferase activity, transferring hexosyl groups	61/1526	445/16956	0.000595397	0.0271905	110940085/110865379/110930321/110930926/110903927/110877439/110930960/110928684/110921688/110927034/110895082/110889990/110889988/110899841/110889986/110899478/110877538/110889985/110930924/110889989/110894371/110904593/110926238/110937503/110895765/110903926/110930928/110877108/110908562/110930322/110940168/110912102/110922248/110912981/110908611/110904794/110921502/110898371/110922994/110921206…	LOC110940085/LOC110865379/LOC110930321/LOC110930926/LOC110903927/LOC110877439/LOC110930960/LOC110928684/LOC110921688/LOC110927034/LOC110895082/LOC110889990/LOC110889988/LOC110899841/LOC110889986/LOC110899478/LOC110877538/LOC110889985/LOC110930924/LOC110889989/LOC110894371/LOC110904593/LOC110926238/LOC110937503/LOC110895765/LOC110903926/LOC110930928/LOC110877108/LOC110908562/LOC110930322/LOC110940…	61
MF	GO:0019843	rRNA binding	7/1526	18/16956	0.000615966	0.0271905	110911451/110884280/110941192/110926443/110912484/110891522/110895793	LOC110911451/LOC110884280/LOC110941192/LOC110926443/LOC110912484/LOC110891522/LOC110895793	7
MF	GO:0016717	oxidoreductase activity, acting on paired donors, with oxidation of a pair of donors resulting in the reduction of molecular oxygen to two molecules of water	8/1526	25/16956	0.00113181	0.043716	110879372/110894736/110865239/110865032/110868684/110897314/110890752/110865284	LOC110879372/LOC110894736/LOC110865239/LOC110865032/LOC110868684/LOC110897314/LOC110890752/LOC110865284	8
L2 VS L1 down
Category	GO ID	Description	Gene Ratio	Bg Ratio	pvalue	padj	Gene ID	Gene Name	Count
CC	GO:0009579	thylakoid	36/342	62/3608	5.57971e-22	2.23188e-20	110877033/110879131/110936478/110894458/110865288/110864906/110873548/110894815/110899054/110942165/110890423/110935819/110865283/110865167/110911785/110928439/110944637/110884044/110873544/110936970/110889561/110930236/110873481/110910438/110921533/110868758/110884480/110894225/110926335/110942186/110920884/110915897/110877741/110871840/110925655/110929744	LOC110877033/LOC110879131/LOC110936478/LOC110894458/LOC110865288/LOC110864906/LOC110873548/LOC110894815/LOC110899054/LOC110942165/LOC110890423/LOC110935819/LOC110865283/LOC110865167/LOC110911785/LOC110928439/LOC110944637/LOC110884044/LOC110873544/LOC110936970/LOC110889561/LOC110930236/LOC110873481/LOC110910438/LOC110921533/LOC110868758/LOC110884480/LOC110894225/LOC110926335/LOC110942186/LOC110920…	36
CC	GO:0044436	thylakoid part	36/342	62/3608	5.57971e-22	2.23188e-20	110877033/110879131/110936478/110894458/110865288/110864906/110873548/110894815/110899054/110942165/110890423/110935819/110865283/110865167/110911785/110928439/110944637/110884044/110873544/110936970/110889561/110930236/110873481/110910438/110921533/110868758/110884480/110894225/110926335/110942186/110920884/110915897/110877741/110871840/110925655/110929744	LOC110877033/LOC110879131/LOC110936478/LOC110894458/LOC110865288/LOC110864906/LOC110873548/LOC110894815/LOC110899054/LOC110942165/LOC110890423/LOC110935819/LOC110865283/LOC110865167/LOC110911785/LOC110928439/LOC110944637/LOC110884044/LOC110873544/LOC110936970/LOC110889561/LOC110930236/LOC110873481/LOC110910438/LOC110921533/LOC110868758/LOC110884480/LOC110894225/LOC110926335/LOC110942186/LOC110920…	36
CC	GO:0009521	photosystem	34/342	56/3608	1.08272e-21	2.88726e-20	110877033/110879131/110936478/110894458/110865288/110864906/110873548/110894815/110899054/110942165/110890423/110935819/110865283/110865167/110911785/110928439/110944637/110884044/110873544/110936970/110889561/110930236/110873481/110910438/110921533/110868758/110884480/110894225/110926335/110942186/110920884/110877741/110871840/110925655	LOC110877033/LOC110879131/LOC110936478/LOC110894458/LOC110865288/LOC110864906/LOC110873548/LOC110894815/LOC110899054/LOC110942165/LOC110890423/LOC110935819/LOC110865283/LOC110865167/LOC110911785/LOC110928439/LOC110944637/LOC110884044/LOC110873544/LOC110936970/LOC110889561/LOC110930236/LOC110873481/LOC110910438/LOC110921533/LOC110868758/LOC110884480/LOC110894225/LOC110926335/LOC110942186/LOC110920…	34
CC	GO:0034357	photosynthetic membrane	35/342	60/3608	1.7455e-21	3.49099e-20	110877033/110879131/110936478/110894458/110865288/110864906/110873548/110894815/110899054/110942165/110890423/110935819/110865283/110865167/110911785/110928439/110944637/110884044/110873544/110936970/110889561/110930236/110873481/110910438/110921533/110868758/110884480/110894225/110926335/110942186/110920884/110877741/110871840/110925655/110929744	LOC110877033/LOC110879131/LOC110936478/LOC110894458/LOC110865288/LOC110864906/LOC110873548/LOC110894815/LOC110899054/LOC110942165/LOC110890423/LOC110935819/LOC110865283/LOC110865167/LOC110911785/LOC110928439/LOC110944637/LOC110884044/LOC110873544/LOC110936970/LOC110889561/LOC110930236/LOC110873481/LOC110910438/LOC110921533/LOC110868758/LOC110884480/LOC110894225/LOC110926335/LOC110942186/LOC110920…	35
BP	GO:0015979	photosynthesis	37/1151	64/10783	3.17063e-20	1.36337e-17	110877033/110879131/110936478/110894458/110865288/110864906/110873548/110894815/110899054/110942165/110890423/110935819/110865283/110865167/110911785/110928439/110944637/110884044/110873544/110936970/110889561/110930236/110873481/110921836/110910438/110921533/110868758/110884480/110894225/110926335/110942186/110920884/110864866/110921112/110877741/110871840/110925655	LOC110877033/LOC110879131/LOC110936478/LOC110894458/LOC110865288/LOC110864906/LOC110873548/LOC110894815/LOC110899054/LOC110942165/LOC110890423/LOC110935819/LOC110865283/LOC110865167/LOC110911785/LOC110928439/LOC110944637/LOC110884044/LOC110873544/LOC110936970/LOC110889561/LOC110930236/LOC110873481/LOC110921836/LOC110910438/LOC110921533/LOC110868758/LOC110884480/LOC110894225/LOC110926335/LOC110942…	37
CC	GO:0009522	photosystem I	17/342	21/3608	1.16845e-14	1.86953e-13	110936478/110894458/110873548/110894815/110899054/110942165/110911785/110936970/110889561/110930236/110873481/110910438/110884480/110894225/110926335/110920884/110925655	LOC110936478/LOC110894458/LOC110873548/LOC110894815/LOC110899054/LOC110942165/LOC110911785/LOC110936970/LOC110889561/LOC110930236/LOC110873481/LOC110910438/LOC110884480/LOC110894225/LOC110926335/LOC110920884/LOC110925655	17
CC	GO:0009538	photosystem I reaction center	11/342	12/3608	5.26409e-11	7.01878e-10	110894458/110894815/110899054/110889561/110930236/110873481/110910438/110884480/110894225/110926335/110920884	LOC110894458/LOC110894815/LOC110899054/LOC110889561/LOC110930236/LOC110873481/LOC110910438/LOC110884480/LOC110894225/LOC110926335/LOC110920884	11
CC	GO:0009523	photosystem II	17/342	33/3608	7.7997e-10	8.91394e-09	110877033/110879131/110865288/110864906/110890423/110935819/110865283/110865167/110928439/110944637/110884044/110873544/110921533/110868758/110942186/110877741/110871840	LOC110877033/LOC110879131/LOC110865288/LOC110864906/LOC110890423/LOC110935819/LOC110865283/LOC110865167/LOC110928439/LOC110944637/LOC110884044/LOC110873544/LOC110921533/LOC110868758/LOC110942186/LOC110877741/LOC110871840	17
CC	GO:0042651	thylakoid membrane	11/342	25/3608	6.24076e-06	6.22655e-05	110879131/110864906/110890423/110935819/110944637/110873544/110868758/110942186/110877741/110871840/110929744	LOC110879131/LOC110864906/LOC110890423/LOC110935819/LOC110944637/LOC110873544/LOC110868758/LOC110942186/LOC110877741/LOC110871840/LOC110929744	11
CC	GO:0009654	photosystem II oxygen evolving complex	10/342	21/3608	7.00487e-06	6.22655e-05	110879131/110864906/110890423/110935819/110944637/110873544/110868758/110942186/110877741/110871840	LOC110879131/LOC110864906/LOC110890423/LOC110935819/LOC110944637/LOC110873544/LOC110868758/LOC110942186/LOC110877741/LOC110871840	10
CC	GO:0009507	chloroplast	7/342	11/3608	1.52862e-05	0.000109728	110889417/110865288/110865283/110884044/110911893/110898842/novel.2877	LOC110889417/LOC110865288/LOC110865283/LOC110884044/LOC110911893/LOC110898842/-	7
CC	GO:0009536	plastid	7/342	11/3608	1.52862e-05	0.000109728	110889417/110865288/110865283/110884044/110911893/110898842/novel.2877	LOC110889417/LOC110865288/LOC110865283/LOC110884044/LOC110911893/LOC110898842/-	7
CC	GO:0098796	membrane protein complex	40/342	216/3608	1.64592e-05	0.000109728	110877033/110879131/110936478/110894458/110865288/110864906/110873548/110894815/110899054/110942165/110890423/110935819/110865283/110865167/110911785/110928439/110944637/110884044/110873544/110936970/110889561/110930236/110873481/110910438/110921533/110868758/110884480/110910794/110894225/110926335/110939630/110879871/110942186/110920884/110921057/110876653/110877741/110871840/110925655/110898552	LOC110877033/LOC110879131/LOC110936478/LOC110894458/LOC110865288/LOC110864906/LOC110873548/LOC110894815/LOC110899054/LOC110942165/LOC110890423/LOC110935819/LOC110865283/LOC110865167/LOC110911785/LOC110928439/LOC110944637/LOC110884044/LOC110873544/LOC110936970/LOC110889561/LOC110930236/LOC110873481/LOC110910438/LOC110921533/LOC110868758/LOC110884480/LOC110910794/LOC110894225/LOC110926335/LOC110939…	40
CC	GO:0019898	extrinsic component of membrane	9/342	20/3608	3.63461e-05	0.000223668	110879131/110864906/110890423/110935819/110944637/110868758/110921057/110877741/110871840	LOC110879131/LOC110864906/LOC110890423/LOC110935819/LOC110944637/LOC110868758/LOC110921057/LOC110877741/LOC110871840	9
CC	GO:1990204	oxidoreductase complex	10/342	25/3608	4.5846e-05	0.000261977	110879131/110864906/110890423/110935819/110944637/110873544/110868758/110942186/110877741/110871840	LOC110879131/LOC110864906/LOC110890423/LOC110935819/LOC110944637/LOC110873544/LOC110868758/LOC110942186/LOC110877741/LOC110871840	10
MF	GO:0004866	endopeptidase inhibitor activity	12/1636	31/16956	1.53793e-05	0.00120885	110937716/110937706/110937731/110936166/110900204/110936141/110926788/110904629/110923710/110918735/110935737/110865666	LOC110937716/LOC110937706/LOC110937731/LOC110936166/LOC110900204/LOC110936141/LOC110926788/LOC110904629/LOC110923710/LOC110918735/LOC110935737/LOC110865666	12
MF	GO:0030414	peptidase inhibitor activity	12/1636	31/16956	1.53793e-05	0.00120885	110937716/110937706/110937731/110936166/110900204/110936141/110926788/110904629/110923710/110918735/110935737/110865666	LOC110937716/LOC110937706/LOC110937731/LOC110936166/LOC110900204/LOC110936141/LOC110926788/LOC110904629/LOC110923710/LOC110918735/LOC110935737/LOC110865666	12
MF	GO:0061134	peptidase regulator activity	12/1636	31/16956	1.53793e-05	0.00120885	110937716/110937706/110937731/110936166/110900204/110936141/110926788/110904629/110923710/110918735/110935737/110865666	LOC110937716/LOC110937706/LOC110937731/LOC110936166/LOC110900204/LOC110936141/LOC110926788/LOC110904629/LOC110923710/LOC110918735/LOC110935737/LOC110865666	12
MF	GO:0061135	endopeptidase regulator activity	12/1636	31/16956	1.53793e-05	0.00120885	110937716/110937706/110937731/110936166/110900204/110936141/110926788/110904629/110923710/110918735/110935737/110865666	LOC110937716/LOC110937706/LOC110937731/LOC110936166/LOC110900204/LOC110936141/LOC110926788/LOC110904629/LOC110923710/LOC110918735/LOC110935737/LOC110865666	12
MF	GO:0004867	serine-type endopeptidase inhibitor activity	7/1636	11/16956	1.78824e-05	0.00120885	110937716/110937706/110937731/110936166/110936141/110935737/110865666	LOC110937716/LOC110937706/LOC110937731/LOC110936166/LOC110936141/LOC110935737/LOC110865666	7
MF	GO:0016747	transferase activity, transferring acyl groups other than amino-acyl groups	42/1636	233/16956	5.20719e-05	0.00293338	110911701/110941383/110930996/110865504/110926692/110921508/110890001/110914980/110879841/110928960/110881068/110909079/110922481/110891233/110935924/110921298/110891217/110918282/110891216/110937516/110941974/110938238/110891218/110914973/110873194/110871177/110923011/110884237/110880003/110889392/110911294/110886259/110893733/110877397/110904878/110941600/110865789/110884775/110909196/110941979…	LOC110911701/LOC110941383/LOC110930996/LOC110865504/LOC110926692/LOC110921508/LOC110890001/LOC110914980/LOC110879841/LOC110928960/LOC110881068/LOC110909079/LOC110922481/LOC110891233/LOC110935924/LOC110921298/LOC110891217/LOC110918282/LOC110891216/LOC110937516/LOC110941974/LOC110938238/LOC110891218/LOC110914973/LOC110873194/LOC110871177/LOC110923011/LOC110884237/LOC110880003/LOC110889392/LOC110911…	42
MF	GO:0004842	ubiquitin-protein transferase activity	22/1636	96/16956	9.48972e-05	0.00400941	110895193/110891052/110898209/110892806/110925302/110872269/110935515/110877804/110904638/110887310/110927377/110868152/110939739/110917003/110912347/110895283/110918126/110894706/110900231/110878199/110905406/110869152	LOC110895193/LOC110891052/LOC110898209/LOC110892806/LOC110925302/LOC110872269/LOC110935515/LOC110877804/LOC110904638/LOC110887310/LOC110927377/LOC110868152/LOC110939739/LOC110917003/LOC110912347/LOC110895283/LOC110918126/LOC110894706/LOC110900231/LOC110878199/LOC110905406/LOC110869152	22
MF	GO:0019787	ubiquitin-like protein transferase activity	22/1636	96/16956	9.48972e-05	0.00400941	110895193/110891052/110898209/110892806/110925302/110872269/110935515/110877804/110904638/110887310/110927377/110868152/110939739/110917003/110912347/110895283/110918126/110894706/110900231/110878199/110905406/110869152	LOC110895193/LOC110891052/LOC110898209/LOC110892806/LOC110925302/LOC110872269/LOC110935515/LOC110877804/LOC110904638/LOC110887310/LOC110927377/LOC110868152/LOC110939739/LOC110917003/LOC110912347/LOC110895283/LOC110918126/LOC110894706/LOC110900231/LOC110878199/LOC110905406/LOC110869152	22
BP	GO:0009611	response to wounding	7/1151	11/10783	3.47396e-05	0.00519956	110937716/110937706/110937731/110936166/110936141/110935737/110865666	LOC110937716/LOC110937706/LOC110937731/LOC110936166/LOC110936141/LOC110935737/LOC110865666	7
BP	GO:0016567	protein ubiquitination	22/1151	83/10783	3.96297e-05	0.00519956	110895193/110891052/110898209/110892806/110925302/110872269/110935515/110877804/110904638/110887310/110927377/110868152/110939739/110917003/110912347/110895283/110918126/110894706/110900231/110878199/110905406/110869152	LOC110895193/LOC110891052/LOC110898209/LOC110892806/LOC110925302/LOC110872269/LOC110935515/LOC110877804/LOC110904638/LOC110887310/LOC110927377/LOC110868152/LOC110939739/LOC110917003/LOC110912347/LOC110895283/LOC110918126/LOC110894706/LOC110900231/LOC110878199/LOC110905406/LOC110869152	22
BP	GO:0032446	protein modification by small protein conjugation	22/1151	84/10783	4.8368e-05	0.00519956	110895193/110891052/110898209/110892806/110925302/110872269/110935515/110877804/110904638/110887310/110927377/110868152/110939739/110917003/110912347/110895283/110918126/110894706/110900231/110878199/110905406/110869152	LOC110895193/LOC110891052/LOC110898209/LOC110892806/LOC110925302/LOC110872269/LOC110935515/LOC110877804/LOC110904638/LOC110887310/LOC110927377/LOC110868152/LOC110939739/LOC110917003/LOC110912347/LOC110895283/LOC110918126/LOC110894706/LOC110900231/LOC110878199/LOC110905406/LOC110869152	22
MF	GO:0022836	gated channel activity	12/1636	43/16956	0.000559783	0.0150024	110878437/110866007/110912225/110938188/110940781/110920626/110877644/110894144/110892471/110885965/110926348/110878679	LOC110878437/LOC110866007/LOC110912225/LOC110938188/LOC110940781/LOC110920626/LOC110877644/LOC110894144/LOC110892471/LOC110885965/LOC110926348/LOC110878679	12
MF	GO:0022839	ion gated channel activity	12/1636	43/16956	0.000559783	0.0150024	110878437/110866007/110912225/110938188/110940781/110920626/110877644/110894144/110892471/110885965/110926348/110878679	LOC110878437/LOC110866007/LOC110912225/LOC110938188/LOC110940781/LOC110920626/LOC110877644/LOC110894144/LOC110892471/LOC110885965/LOC110926348/LOC110878679	12
MF	GO:0005244	voltage-gated ion channel activity	6/1636	13/16956	0.000754557	0.0150024	110878437/110912225/110940781/110920626/110877644/110926348	LOC110878437/LOC110912225/LOC110940781/LOC110920626/LOC110877644/LOC110926348	6
MF	GO:0005247	voltage-gated chloride channel activity	6/1636	13/16956	0.000754557	0.0150024	110878437/110912225/110940781/110920626/110877644/110926348	LOC110878437/LOC110912225/LOC110940781/LOC110920626/LOC110877644/LOC110926348	6
MF	GO:0005253	anion channel activity	6/1636	13/16956	0.000754557	0.0150024	110878437/110912225/110940781/110920626/110877644/110926348	LOC110878437/LOC110912225/LOC110940781/LOC110920626/LOC110877644/LOC110926348	6
MF	GO:0005254	chloride channel activity	6/1636	13/16956	0.000754557	0.0150024	110878437/110912225/110940781/110920626/110877644/110926348	LOC110878437/LOC110912225/LOC110940781/LOC110920626/LOC110877644/LOC110926348	6
MF	GO:0008308	voltage-gated anion channel activity	6/1636	13/16956	0.000754557	0.0150024	110878437/110912225/110940781/110920626/110877644/110926348	LOC110878437/LOC110912225/LOC110940781/LOC110920626/LOC110877644/LOC110926348	6
MF	GO:0015108	chloride transmembrane transporter activity	6/1636	13/16956	0.000754557	0.0150024	110878437/110912225/110940781/110920626/110877644/110926348	LOC110878437/LOC110912225/LOC110940781/LOC110920626/LOC110877644/LOC110926348	6
MF	GO:0022832	voltage-gated channel activity	6/1636	13/16956	0.000754557	0.0150024	110878437/110912225/110940781/110920626/110877644/110926348	LOC110878437/LOC110912225/LOC110940781/LOC110920626/LOC110877644/LOC110926348	6
MF	GO:0016746	transferase activity, transferring acyl groups	45/1636	288/16956	0.000816369	0.0153296	110911701/110941383/110930996/110865504/110926692/110921508/110890001/110914980/110879841/110928960/110881068/110909079/110922481/110891233/110935924/110925672/110921298/110891217/110918282/110891216/110937516/110941974/110938238/110891218/110914973/110873194/110871177/110923011/110884237/110880003/110889392/110911294/110886259/110893733/110877397/110904878/110941600/110912355/110865789/110864723…	LOC110911701/LOC110941383/LOC110930996/LOC110865504/LOC110926692/LOC110921508/LOC110890001/LOC110914980/LOC110879841/LOC110928960/LOC110881068/LOC110909079/LOC110922481/LOC110891233/LOC110935924/LOC110925672/LOC110921298/LOC110891217/LOC110918282/LOC110891216/LOC110937516/LOC110941974/LOC110938238/LOC110891218/LOC110914973/LOC110873194/LOC110871177/LOC110923011/LOC110884237/LOC110880003/LOC110889…	45
MF	GO:0005216	ion channel activity	17/1636	80/16956	0.00140721	0.0216199	110878437/110866007/110912225/110923450/110908589/110938188/110935981/110940781/110920626/110904285/110877644/110894144/110892471/110931052/110885965/110926348/110878679	LOC110878437/LOC110866007/LOC110912225/LOC110923450/LOC110908589/LOC110938188/LOC110935981/LOC110940781/LOC110920626/LOC110904285/LOC110877644/LOC110894144/LOC110892471/LOC110931052/LOC110885965/LOC110926348/LOC110878679	17
MF	GO:0015267	channel activity	17/1636	80/16956	0.00140721	0.0216199	110878437/110866007/110912225/110923450/110908589/110938188/110935981/110940781/110920626/110904285/110877644/110894144/110892471/110931052/110885965/110926348/110878679	LOC110878437/LOC110866007/LOC110912225/LOC110923450/LOC110908589/LOC110938188/LOC110935981/LOC110940781/LOC110920626/LOC110904285/LOC110877644/LOC110894144/LOC110892471/LOC110931052/LOC110885965/LOC110926348/LOC110878679	17
MF	GO:0022803	passive transmembrane transporter activity	17/1636	80/16956	0.00140721	0.0216199	110878437/110866007/110912225/110923450/110908589/110938188/110935981/110940781/110920626/110904285/110877644/110894144/110892471/110931052/110885965/110926348/110878679	LOC110878437/LOC110866007/LOC110912225/LOC110923450/LOC110908589/LOC110938188/LOC110935981/LOC110940781/LOC110920626/LOC110904285/LOC110877644/LOC110894144/LOC110892471/LOC110931052/LOC110885965/LOC110926348/LOC110878679	17
MF	GO:0022838	substrate-specific channel activity	17/1636	80/16956	0.00140721	0.0216199	110878437/110866007/110912225/110923450/110908589/110938188/110935981/110940781/110920626/110904285/110877644/110894144/110892471/110931052/110885965/110926348/110878679	LOC110878437/LOC110866007/LOC110912225/LOC110923450/LOC110908589/LOC110938188/LOC110935981/LOC110940781/LOC110920626/LOC110904285/LOC110877644/LOC110894144/LOC110892471/LOC110931052/LOC110885965/LOC110926348/LOC110878679	17
MF	GO:0004857	enzyme inhibitor activity	23/1636	124/16956	0.0016316	0.0239775	110937716/110937706/110937731/110936166/110884262/110900204/110894160/110894158/110894157/110936141/110870592/110926788/110887014/110904629/110870643/110869185/110923710/110918735/110935442/110880309/110915198/110935737/110865666	LOC110937716/LOC110937706/LOC110937731/LOC110936166/LOC110884262/LOC110900204/LOC110894160/LOC110894158/LOC110894157/LOC110936141/LOC110870592/LOC110926788/LOC110887014/LOC110904629/LOC110870643/LOC110869185/LOC110923710/LOC110918735/LOC110935442/LOC110880309/LOC110915198/LOC110935737/LOC110865666	23
MF	GO:0016829	lyase activity	37/1636	235/16956	0.00197714	0.0278447	110890387/110903851/110921799/110894551/110879292/110890390/110878297/110884960/110916766/110904940/110921325/110944994/110908283/110864598/110898249/110885782/110879816/110916971/110909077/110909354/110872707/110867829/110867917/110915413/110923153/110896035/110905005/110879229/novel.4153/110868299/110868551/110926199/110922544/110886033/110941744/110899468/110899213	LOC110890387/LOC110903851/LOC110921799/LOC110894551/LOC110879292/LOC110890390/LOC110878297/LOC110884960/LOC110916766/LOC110904940/LOC110921325/LOC110944994/LOC110908283/LOC110864598/LOC110898249/LOC110885782/LOC110879816/LOC110916971/LOC110909077/LOC110909354/LOC110872707/LOC110867829/LOC110867917/LOC110915413/LOC110923153/LOC110896035/LOC110905005/LOC110879229/-/LOC110868299/LOC110868551/LOC1109…	37
BP	GO:0000160	phosphorelay signal transduction system	14/1151	49/10783	0.000428462	0.0368478	110879774/110900304/110891488/110917737/110895017/110940269/110873371/110894634/110897868/110873837/110908801/110941117/110894268/110883863	LOC110879774/LOC110900304/LOC110891488/LOC110917737/LOC110895017/LOC110940269/LOC110873371/LOC110894634/LOC110897868/LOC110873837/LOC110908801/LOC110941117/LOC110894268/LOC110883863	14

## Sheet: L2 VS L0
L2 VS L0 up
Category	GO ID	Description	Gene Ratio	Bg Ratio	pvalue	padj	Gene ID	Gene Name	Count
MF	GO:0016798	hydrolase activity, acting on glycosyl bonds	81/2197	359/16726	5.1534e-07	0.000165424	110921103/110908804/110864801/110927034/110889244/110926292/110920730/110895792/110929923/110910101/110905146/110878463/110919216/110895514/110889733/110930247/110917272/110886067/110883145/110926060/110941017/110900368/110873387/110915394/110883195/110885786/110886626/110868493/110891377/110940573/110935541/110891378/110864490/110899444/110940572/110864442/110927170/110895465/110918649/110891083…	LOC110921103/LOC110908804/LOC110864801/LOC110927034/LOC110889244/LOC110926292/LOC110920730/LOC110895792/LOC110929923/LOC110910101/LOC110905146/LOC110878463/LOC110919216/LOC110895514/LOC110889733/LOC110930247/LOC110917272/LOC110886067/LOC110883145/LOC110926060/LOC110941017/LOC110900368/LOC110873387/LOC110915394/LOC110883195/LOC110885786/LOC110886626/LOC110868493/LOC110891377/LOC110940573/LOC110935…	81
MF	GO:0004553	hydrolase activity, hydrolyzing O-glycosyl compounds	75/2197	338/16726	2.60722e-06	0.000327004	110921103/110908804/110864801/110927034/110889244/110926292/110920730/110895792/110929923/110910101/110905146/110878463/110919216/110889733/110930247/110886067/110883145/110926060/110941017/110900368/110873387/110915394/110883195/110885786/110868493/110891377/110940573/110935541/110891378/110864490/110899444/110940572/110864442/110927170/110895465/110918649/110891083/110929955/110865838/110941396…	LOC110921103/LOC110908804/LOC110864801/LOC110927034/LOC110889244/LOC110926292/LOC110920730/LOC110895792/LOC110929923/LOC110910101/LOC110905146/LOC110878463/LOC110919216/LOC110889733/LOC110930247/LOC110886067/LOC110883145/LOC110926060/LOC110941017/LOC110900368/LOC110873387/LOC110915394/LOC110883195/LOC110885786/LOC110868493/LOC110891377/LOC110940573/LOC110935541/LOC110891378/LOC110864490/LOC110899…	75
MF	GO:0030246	carbohydrate binding	46/2197	177/16726	3.05611e-06	0.000327004	110903782/110872621/110929368/110929367/110878463/110879231/110927327/110930247/110909009/110926060/110930447/110869072/110931016/110939865/110897349/110937930/110889805/110903828/110886512/110889428/110911000/110918649/110927059/110915112/110867978/110922704/110916782/110903783/110915621/110889427/110889993/110940642/110904823/110919861/110897348/110921371/110865408/110937614/110900151/110908593…	LOC110903782/LOC110872621/LOC110929368/LOC110929367/LOC110878463/LOC110879231/LOC110927327/LOC110930247/LOC110909009/LOC110926060/LOC110930447/LOC110869072/LOC110931016/LOC110939865/LOC110897349/LOC110937930/LOC110889805/LOC110903828/LOC110886512/LOC110889428/LOC110911000/LOC110918649/LOC110927059/LOC110915112/LOC110867978/LOC110922704/LOC110916782/LOC110903783/LOC110915621/LOC110889427/LOC110889…	46
MF	GO:0005506	iron ion binding	79/2197	392/16726	5.65212e-05	0.00395387	110886492/110915221/110897773/110936772/110918706/110920974/110936214/110864941/110917534/110898092/110894027/110911674/110868391/110897342/110928786/110916740/110920812/110898214/110865691/110915293/110908670/110899122/110886538/110877288/110899627/110893864/110928784/110877170/110935961/110912986/110920962/110930453/110879855/110936771/110908215/110920509/110908671/110920960/110899636/110878825…	LOC110886492/LOC110915221/LOC110897773/LOC110936772/LOC110918706/LOC110920974/LOC110936214/LOC110864941/LOC110917534/LOC110898092/LOC110894027/LOC110911674/LOC110868391/LOC110897342/LOC110928786/LOC110916740/LOC110920812/LOC110898214/LOC110865691/LOC110915293/LOC110908670/LOC110899122/LOC110886538/LOC110877288/LOC110899627/LOC110893864/LOC110928784/LOC110877170/LOC110935961/LOC110912986/LOC110920…	79
MF	GO:0020037	heme binding	88/2197	450/16726	6.91209e-05	0.00395387	110886492/110883825/110915221/110904034/110897773/110910789/110918706/110920974/110936214/110917534/110922647/110898092/110894027/110942325/110911674/110924631/110868391/110897342/110928786/110916740/110923094/110920812/110898214/110915293/110908670/110899122/110886538/110894757/110877288/110899627/110893864/110917399/110928784/110877170/110935961/110912986/110920962/110930453/110915510/110895595…	LOC110886492/LOC110883825/LOC110915221/LOC110904034/LOC110897773/LOC110910789/LOC110918706/LOC110920974/LOC110936214/LOC110917534/LOC110922647/LOC110898092/LOC110894027/LOC110942325/LOC110911674/LOC110924631/LOC110868391/LOC110897342/LOC110928786/LOC110916740/LOC110923094/LOC110920812/LOC110898214/LOC110915293/LOC110908670/LOC110899122/LOC110886538/LOC110894757/LOC110877288/LOC110899627/LOC110893…	88
MF	GO:0008289	lipid binding	28/2197	101/16726	7.39042e-05	0.00395387	110899531/110927174/110899529/110908077/110899530/110898549/110917831/110868382/110923740/110904293/110915396/110942402/110900216/110935583/110894241/110940552/110886668/110910833/110909109/110893350/110915184/110886549/110922021/110892845/110886725/110898062/110922976/110892317	LOC110899531/LOC110927174/LOC110899529/LOC110908077/LOC110899530/LOC110898549/LOC110917831/LOC110868382/LOC110923740/LOC110904293/LOC110915396/LOC110942402/LOC110900216/LOC110935583/LOC110894241/LOC110940552/LOC110886668/LOC110910833/LOC110909109/LOC110893350/LOC110915184/LOC110886549/LOC110922021/LOC110892845/LOC110886725/LOC110898062/LOC110922976/LOC110892317	28
MF	GO:0046906	tetrapyrrole binding	88/2197	453/16726	8.83298e-05	0.00405055	110886492/110883825/110915221/110904034/110897773/110910789/110918706/110920974/110936214/110917534/110922647/110898092/110894027/110942325/110911674/110924631/110868391/110897342/110928786/110916740/110923094/110920812/110898214/110915293/110908670/110899122/110886538/110894757/110877288/110899627/110893864/110917399/110928784/110877170/110935961/110912986/110920962/110930453/110915510/110895595…	LOC110886492/LOC110883825/LOC110915221/LOC110904034/LOC110897773/LOC110910789/LOC110918706/LOC110920974/LOC110936214/LOC110917534/LOC110922647/LOC110898092/LOC110894027/LOC110942325/LOC110911674/LOC110924631/LOC110868391/LOC110897342/LOC110928786/LOC110916740/LOC110923094/LOC110920812/LOC110898214/LOC110915293/LOC110908670/LOC110899122/LOC110886538/LOC110894757/LOC110877288/LOC110899627/LOC110893…	88
MF	GO:0010333	terpene synthase activity	20/2197	63/16726	0.000102228	0.00410191	110908283/110924412/110929769/110917082/110929414/110917103/110912252/110908492/110918153/110917200/110940058/110893972/110940074/110884117/110917813/110918013/110921961/110925663/110864635/110910286	LOC110908283/LOC110924412/LOC110929769/LOC110917082/LOC110929414/LOC110917103/LOC110912252/LOC110908492/LOC110918153/LOC110917200/LOC110940058/LOC110893972/LOC110940074/LOC110884117/LOC110917813/LOC110918013/LOC110921961/LOC110925663/LOC110864635/LOC110910286	20
CC	GO:0005618	cell wall	23/425	90/3589	0.000212259	0.00615551	110927034/110869237/110920730/110895792/110940526/110886426/110900061/110865760/110895465/110880308/110894159/110931108/110935912/110911281/110911940/110940225/110900062/110894418/110865209/110889990/110940246/110884283/110889986	LOC110927034/LOC110869237/LOC110920730/LOC110895792/LOC110940526/LOC110886426/LOC110900061/LOC110865760/LOC110895465/LOC110880308/LOC110894159/LOC110931108/LOC110935912/LOC110911281/LOC110911940/LOC110940225/LOC110900062/LOC110894418/LOC110865209/LOC110889990/LOC110940246/LOC110884283/LOC110889986	23
CC	GO:0030312	external encapsulating structure	23/425	90/3589	0.000212259	0.00615551	110927034/110869237/110920730/110895792/110940526/110886426/110900061/110865760/110895465/110880308/110894159/110931108/110935912/110911281/110911940/110940225/110900062/110894418/110865209/110889990/110940246/110884283/110889986	LOC110927034/LOC110869237/LOC110920730/LOC110895792/LOC110940526/LOC110886426/LOC110900061/LOC110865760/LOC110895465/LOC110880308/LOC110894159/LOC110931108/LOC110935912/LOC110911281/LOC110911940/LOC110940225/LOC110900062/LOC110894418/LOC110865209/LOC110889990/LOC110940246/LOC110884283/LOC110889986	23
MF	GO:0016705	oxidoreductase activity, acting on paired donors, with incorporation or reduction of molecular oxygen	80/2197	412/16726	0.000183856	0.00655754	110865032/110886492/110915221/110897773/110879372/110918706/110920974/110868642/110936214/110894736/110917534/110865239/110898092/110894027/110911674/110868391/110897342/110928786/110916740/110920812/110898214/110865691/110915293/110908670/110899122/110886538/110877288/110879711/110899627/110893864/110928784/110877170/110935961/110912986/110920962/110930453/110879855/110908215/110908671/110920960…	LOC110865032/LOC110886492/LOC110915221/LOC110897773/LOC110879372/LOC110918706/LOC110920974/LOC110868642/LOC110936214/LOC110894736/LOC110917534/LOC110865239/LOC110898092/LOC110894027/LOC110911674/LOC110868391/LOC110897342/LOC110928786/LOC110916740/LOC110920812/LOC110898214/LOC110865691/LOC110915293/LOC110908670/LOC110899122/LOC110886538/LOC110877288/LOC110879711/LOC110899627/LOC110893864/LOC110928…	80
MF	GO:0016838	carbon-oxygen lyase activity, acting on phosphates	20/2197	66/16726	0.000208518	0.00669344	110908283/110924412/110929769/110917082/110929414/110917103/110912252/110908492/110918153/110917200/110940058/110893972/110940074/110884117/110917813/110918013/110921961/110925663/110864635/110910286	LOC110908283/LOC110924412/LOC110929769/LOC110917082/LOC110929414/LOC110917103/LOC110912252/LOC110908492/LOC110918153/LOC110917200/LOC110940058/LOC110893972/LOC110940074/LOC110884117/LOC110917813/LOC110918013/LOC110921961/LOC110925663/LOC110864635/LOC110910286	20
MF	GO:0043565	sequence-specific DNA binding	62/2197	311/16726	0.000457916	0.0133628	110878107/110872305/110864423/110911278/110922861/110879036/110921362/110868000/110889319/110889385/110885891/110929319/110910181/110929937/110936976/110900082/110911448/110915202/110873608/110922794/110889630/110868001/110915423/110899732/110914945/110884382/110872579/110935899/110875469/110899133/110907992/110940633/110928576/110936939/110871776/110912966/110915420/110904964/110874707/110937524…	LOC110878107/LOC110872305/LOC110864423/LOC110911278/LOC110922861/LOC110879036/LOC110921362/LOC110868000/LOC110889319/LOC110889385/LOC110885891/LOC110929319/LOC110910181/LOC110929937/LOC110936976/LOC110900082/LOC110911448/LOC110915202/LOC110873608/LOC110922794/LOC110889630/LOC110868001/LOC110915423/LOC110899732/LOC110914945/LOC110884382/LOC110872579/LOC110935899/LOC110875469/LOC110899133/LOC110907…	62
MF	GO:0016758	transferase activity, transferring hexosyl groups	82/2197	443/16726	0.000731213	0.01956	110927034/110921502/110912127/110903925/110885284/110895082/110904794/110865620/110926037/110872646/110920730/110895792/110930325/110937605/110912981/110941504/110940310/110903926/110915747/110911302/110937894/110935431/110871646/110909236/110943205/110865003/110910533/110935750/110886141/110930628/110877111/110937161/110868211/110867769/110866865/110867985/110904799/110896059/110930960/110877119…	LOC110927034/LOC110921502/LOC110912127/LOC110903925/LOC110885284/LOC110895082/LOC110904794/LOC110865620/LOC110926037/LOC110872646/LOC110920730/LOC110895792/LOC110930325/LOC110937605/LOC110912981/LOC110941504/LOC110940310/LOC110903926/LOC110915747/LOC110911302/LOC110937894/LOC110935431/LOC110871646/LOC110909236/LOC110943205/LOC110865003/LOC110910533/LOC110935750/LOC110886141/LOC110930628/LOC110877…	82
CC	GO:0071944	cell periphery	32/425	158/3589	0.00130283	0.025188	110927034/110869237/110867850/110926037/110920730/110895792/110940526/110904402/110937894/110926312/110886426/110900061/110865760/110895465/110880308/110894159/110931108/110935912/110911281/110911940/110935451/110940225/110900062/110894418/110865209/110895214/110888107/110889990/110940246/110873940/110884283/110889986	LOC110927034/LOC110869237/LOC110867850/LOC110926037/LOC110920730/LOC110895792/LOC110940526/LOC110904402/LOC110937894/LOC110926312/LOC110886426/LOC110900061/LOC110865760/LOC110895465/LOC110880308/LOC110894159/LOC110931108/LOC110935912/LOC110911281/LOC110911940/LOC110935451/LOC110940225/LOC110900062/LOC110894418/LOC110865209/LOC110895214/LOC110888107/LOC110889990/LOC110940246/LOC110873940/LOC110884…	32
MF	GO:0004185	serine-type carboxypeptidase activity	19/2197	71/16726	0.00160165	0.0395485	110904561/110918244/110927019/110889345/110886317/110870764/110912893/110915722/110900065/110889271/110874817/110921948/110893961/110865984/110942217/110879148/110912266/110912890/110866151	LOC110904561/LOC110918244/LOC110927019/LOC110889345/LOC110886317/LOC110870764/LOC110912893/LOC110915722/LOC110900065/LOC110889271/LOC110874817/LOC110921948/LOC110893961/LOC110865984/LOC110942217/LOC110879148/LOC110912266/LOC110912890/LOC110866151	19
L2 VS L0 down
Category	GO ID	Description	Gene Ratio	Bg Ratio	pvalue	padj	Gene ID	Gene Name	Count
CC	GO:0034357	photosynthetic membrane	34/342	62/3589	1.23192e-19	1.34279e-17	110926335/110920884/110877310/110942196/110929744/novel.2224/110872538/novel.1088/110873481/110898900/110885465/110894225/110865167/110865288/110942186/110936970/110864906/110879666/110910438/110921533/110896250/110890423/110921758/110935819/110894458/110871505/110944637/110889561/110877033/110936478/110899054/110865283/110928439/110942165	LOC110926335/LOC110920884/LOC110877310/LOC110942196/LOC110929744/-/LOC110872538/-/LOC110873481/LOC110898900/LOC110885465/LOC110894225/LOC110865167/LOC110865288/LOC110942186/LOC110936970/LOC110864906/LOC110879666/LOC110910438/LOC110921533/LOC110896250/LOC110890423/LOC110921758/LOC110935819/LOC110894458/LOC110871505/LOC110944637/LOC110889561/LOC110877033/LOC110936478/LOC110899054/LOC110865283/LOC11…	34
CC	GO:0009579	thylakoid	34/342	64/3589	4.7839e-19	1.73815e-17	110926335/110920884/110877310/110942196/110929744/novel.2224/110872538/novel.1088/110873481/110898900/110885465/110894225/110865167/110865288/110942186/110936970/110864906/110879666/110910438/110921533/110896250/110890423/110921758/110935819/110894458/110871505/110944637/110889561/110877033/110936478/110899054/110865283/110928439/110942165	LOC110926335/LOC110920884/LOC110877310/LOC110942196/LOC110929744/-/LOC110872538/-/LOC110873481/LOC110898900/LOC110885465/LOC110894225/LOC110865167/LOC110865288/LOC110942186/LOC110936970/LOC110864906/LOC110879666/LOC110910438/LOC110921533/LOC110896250/LOC110890423/LOC110921758/LOC110935819/LOC110894458/LOC110871505/LOC110944637/LOC110889561/LOC110877033/LOC110936478/LOC110899054/LOC110865283/LOC11…	34
CC	GO:0044436	thylakoid part	34/342	64/3589	4.7839e-19	1.73815e-17	110926335/110920884/110877310/110942196/110929744/novel.2224/110872538/novel.1088/110873481/110898900/110885465/110894225/110865167/110865288/110942186/110936970/110864906/110879666/110910438/110921533/110896250/110890423/110921758/110935819/110894458/110871505/110944637/110889561/110877033/110936478/110899054/110865283/110928439/110942165	LOC110926335/LOC110920884/LOC110877310/LOC110942196/LOC110929744/-/LOC110872538/-/LOC110873481/LOC110898900/LOC110885465/LOC110894225/LOC110865167/LOC110865288/LOC110942186/LOC110936970/LOC110864906/LOC110879666/LOC110910438/LOC110921533/LOC110896250/LOC110890423/LOC110921758/LOC110935819/LOC110894458/LOC110871505/LOC110944637/LOC110889561/LOC110877033/LOC110936478/LOC110899054/LOC110865283/LOC11…	34
CC	GO:0009521	photosystem	32/342	58/3589	1.21819e-18	3.31956e-17	110926335/110920884/110877310/110942196/novel.2224/110872538/novel.1088/110873481/110885465/110894225/110865167/110865288/110942186/110936970/110864906/110879666/110910438/110921533/110896250/110890423/110921758/110935819/110894458/110871505/110944637/110889561/110877033/110936478/110899054/110865283/110928439/110942165	LOC110926335/LOC110920884/LOC110877310/LOC110942196/-/LOC110872538/-/LOC110873481/LOC110885465/LOC110894225/LOC110865167/LOC110865288/LOC110942186/LOC110936970/LOC110864906/LOC110879666/LOC110910438/LOC110921533/LOC110896250/LOC110890423/LOC110921758/LOC110935819/LOC110894458/LOC110871505/LOC110944637/LOC110889561/LOC110877033/LOC110936478/LOC110899054/LOC110865283/LOC110928439/LOC110942165	32
BP	GO:0015979	photosynthesis	35/1061	66/10643	1.61375e-18	7.39098e-16	novel.2247/110926335/110920884/110877310/110942196/novel.2224/110872538/novel.1088/110873481/110885465/110894225/110865167/110865288/110942186/110936970/110864906/110921112/110879666/110910438/110921533/110896250/110890423/110921758/110935819/110894458/110871505/110944637/110889561/110877033/110936478/110899054/110864866/110865283/110928439/110942165	-/LOC110926335/LOC110920884/LOC110877310/LOC110942196/-/LOC110872538/-/LOC110873481/LOC110885465/LOC110894225/LOC110865167/LOC110865288/LOC110942186/LOC110936970/LOC110864906/LOC110921112/LOC110879666/LOC110910438/LOC110921533/LOC110896250/LOC110890423/LOC110921758/LOC110935819/LOC110894458/LOC110871505/LOC110944637/LOC110889561/LOC110877033/LOC110936478/LOC110899054/LOC110864866/LOC110865283/LOC…	35
BP	GO:0051186	cofactor metabolic process	48/1061	162/10643	1.66858e-12	3.82105e-10	110880108/110895845/110912883/110890891/110944547/110863854/110868740/110925931/110935992/110909022/110864535/110899036/110916150/110915413/110930517/110899468/110868905/110891332/110865490/110912366/110879516/110920573/110872908/110879974/110878007/110879833/110930781/110882039/110904492/110864940/110868285/110884250/110890086/110903846/110916544/110874405/110923557/110884272/110923153/110911456…	LOC110880108/LOC110895845/LOC110912883/LOC110890891/LOC110944547/LOC110863854/LOC110868740/LOC110925931/LOC110935992/LOC110909022/LOC110864535/LOC110899036/LOC110916150/LOC110915413/LOC110930517/LOC110899468/LOC110868905/LOC110891332/LOC110865490/LOC110912366/LOC110879516/LOC110920573/LOC110872908/LOC110879974/LOC110878007/LOC110879833/LOC110930781/LOC110882039/LOC110904492/LOC110864940/LOC110868…	48
CC	GO:0009523	photosystem II	18/342	34/3589	1.45386e-10	3.16942e-09	110877310/110942196/110872538/novel.1088/110865167/110865288/110942186/110864906/110879666/110921533/110890423/110921758/110935819/110871505/110944637/110877033/110865283/110928439	LOC110877310/LOC110942196/LOC110872538/-/LOC110865167/LOC110865288/LOC110942186/LOC110864906/LOC110879666/LOC110921533/LOC110890423/LOC110921758/LOC110935819/LOC110871505/LOC110944637/LOC110877033/LOC110865283/LOC110928439	18
CC	GO:0098796	membrane protein complex	50/342	218/3589	9.38395e-10	1.70475e-08	110926335/110920884/110877310/110939630/110942196/110898552/110910794/novel.2224/110872538/novel.1088/110873481/110885465/110894225/110865167/110865288/110867215/110942186/110936970/110886727/110864906/110904575/novel.4704/110879666/110910438/110921533/110896250/110890423/110921758/110935819/110911651/110893776/110894458/110871505/110886942/110920505/110944637/110935427/110899559/110865472/110889…	LOC110926335/LOC110920884/LOC110877310/LOC110939630/LOC110942196/LOC110898552/LOC110910794/-/LOC110872538/-/LOC110873481/LOC110885465/LOC110894225/LOC110865167/LOC110865288/LOC110867215/LOC110942186/LOC110936970/LOC110886727/LOC110864906/LOC110904575/-/LOC110879666/LOC110910438/LOC110921533/LOC110896250/LOC110890423/LOC110921758/LOC110935819/LOC110911651/LOC110893776/LOC110894458/LOC110871505/LOC…	50
BP	GO:0051188	cofactor biosynthetic process	35/1061	123/10643	5.74679e-09	8.77343e-07	110880108/110895845/110912883/110890891/110925931/110935992/110909022/110899036/110916150/110915413/110930517/110899468/110891332/110865490/110912366/110879516/110879974/110878007/110879833/110930781/110882039/110904492/110864940/110868285/110884250/110890086/110916544/110874405/110923557/110923153/110905169/110941174/110930825/110910129/110864837	LOC110880108/LOC110895845/LOC110912883/LOC110890891/LOC110925931/LOC110935992/LOC110909022/LOC110899036/LOC110916150/LOC110915413/LOC110930517/LOC110899468/LOC110891332/LOC110865490/LOC110912366/LOC110879516/LOC110879974/LOC110878007/LOC110879833/LOC110930781/LOC110882039/LOC110904492/LOC110864940/LOC110868285/LOC110884250/LOC110890086/LOC110916544/LOC110874405/LOC110923557/LOC110923153/LOC110905…	35
CC	GO:0042651	thylakoid membrane	13/342	25/3589	7.72902e-08	1.20352e-06	110877310/110942196/110929744/110872538/110898900/110942186/110864906/110879666/110890423/110921758/110935819/110871505/110944637	LOC110877310/LOC110942196/LOC110929744/LOC110872538/LOC110898900/LOC110942186/LOC110864906/LOC110879666/LOC110890423/LOC110921758/LOC110935819/LOC110871505/LOC110944637	13
CC	GO:0009522	photosystem I	12/342	22/3589	1.24898e-07	1.70173e-06	110926335/110920884/novel.2224/110873481/110894225/110936970/110910438/110894458/110889561/110936478/110899054/110942165	LOC110926335/LOC110920884/-/LOC110873481/LOC110894225/LOC110936970/LOC110910438/LOC110894458/LOC110889561/LOC110936478/LOC110899054/LOC110942165	12
BP	GO:0006732	coenzyme metabolic process	34/1061	124/10643	2.64599e-08	2.50395e-06	110880108/110895845/110912883/110890891/110868740/110925931/110935992/110909022/110899036/110916150/110915413/110930517/110899468/110891332/110865490/110912366/110879516/110872908/110878007/110879833/110882039/110904492/110864940/110868285/110884250/110903846/110916544/110874405/110911456/110905169/110894631/110941174/110910129/110864837	LOC110880108/LOC110895845/LOC110912883/LOC110890891/LOC110868740/LOC110925931/LOC110935992/LOC110909022/LOC110899036/LOC110916150/LOC110915413/LOC110930517/LOC110899468/LOC110891332/LOC110865490/LOC110912366/LOC110879516/LOC110872908/LOC110878007/LOC110879833/LOC110882039/LOC110904492/LOC110864940/LOC110868285/LOC110884250/LOC110903846/LOC110916544/LOC110874405/LOC110911456/LOC110905169/LOC110894…	34
BP	GO:0019637	organophosphate metabolic process	56/1061	264/10643	3.01486e-08	2.50395e-06	110880108/110895845/110912883/110890672/110910056/110872284/110939630/110895578/110868740/110898552/110942324/110925931/110910794/110935992/110923354/110909022/110899036/110916150/110915413/110930517/110899468/110891332/110865490/110878373/110904860/110912366/110879516/110872908/110929354/110878007/110930253/110942326/110879833/110883824/110882039/110921161/110905172/novel.4704/110864940/11090384…	LOC110880108/LOC110895845/LOC110912883/LOC110890672/LOC110910056/LOC110872284/LOC110939630/LOC110895578/LOC110868740/LOC110898552/LOC110942324/LOC110925931/LOC110910794/LOC110935992/LOC110923354/LOC110909022/LOC110899036/LOC110916150/LOC110915413/LOC110930517/LOC110899468/LOC110891332/LOC110865490/LOC110878373/LOC110904860/LOC110912366/LOC110879516/LOC110872908/LOC110929354/LOC110878007/LOC110930…	56
BP	GO:0072524	pyridine-containing compound metabolic process	27/1061	86/10643	3.28028e-08	2.50395e-06	110880108/110895845/110912883/110868740/110925931/110935992/110909022/110899036/110916150/110915413/110930517/110899468/110891332/110865490/110912366/110879516/110872908/110878007/110879833/110882039/110864940/110903846/110916544/110874405/110911456/110905169/110894631	LOC110880108/LOC110895845/LOC110912883/LOC110868740/LOC110925931/LOC110935992/LOC110909022/LOC110899036/LOC110916150/LOC110915413/LOC110930517/LOC110899468/LOC110891332/LOC110865490/LOC110912366/LOC110879516/LOC110872908/LOC110878007/LOC110879833/LOC110882039/LOC110864940/LOC110903846/LOC110916544/LOC110874405/LOC110911456/LOC110905169/LOC110894631	27
BP	GO:0017144	drug metabolic process	44/1061	190/10643	6.58839e-08	4.31069e-06	110880108/110912883/110897428/110926857/110939630/110926472/110865084/110922047/110898552/110925931/110910794/110935992/110909022/110899036/110916150/110915413/110930517/110899468/110891332/110865490/110879516/110878007/110942326/110879833/110883824/110882039/110868551/novel.4704/110904492/110864940/110868285/110904216/110874405/110923557/110864880/110917963/110893776/110872125/110886942/11091291…	LOC110880108/LOC110912883/LOC110897428/LOC110926857/LOC110939630/LOC110926472/LOC110865084/LOC110922047/LOC110898552/LOC110925931/LOC110910794/LOC110935992/LOC110909022/LOC110899036/LOC110916150/LOC110915413/LOC110930517/LOC110899468/LOC110891332/LOC110865490/LOC110879516/LOC110878007/LOC110942326/LOC110879833/LOC110883824/LOC110882039/LOC110868551/-/LOC110904492/LOC110864940/LOC110868285/LOC1109…	44
BP	GO:0019693	ribose phosphate metabolic process	37/1061	148/10643	9.21276e-08	5.27431e-06	110912883/110910056/110939630/110868740/110898552/110942324/110925931/110910794/110935992/110909022/110899036/110916150/110915413/110930517/110899468/110891332/110879516/110872908/110878007/110942326/110883824/110882039/110905172/novel.4704/110864940/110903846/110864880/110893776/110886942/110921418/110911456/110905169/110897855/110894631/110872003/110935487/novel.4718	LOC110912883/LOC110910056/LOC110939630/LOC110868740/LOC110898552/LOC110942324/LOC110925931/LOC110910794/LOC110935992/LOC110909022/LOC110899036/LOC110916150/LOC110915413/LOC110930517/LOC110899468/LOC110891332/LOC110879516/LOC110872908/LOC110878007/LOC110942326/LOC110883824/LOC110882039/LOC110905172/-/LOC110864940/LOC110903846/LOC110864880/LOC110893776/LOC110886942/LOC110921418/LOC110911456/LOC1109…	37
CC	GO:0009654	photosystem II oxygen evolving complex	11/342	21/3589	7.39617e-07	8.75484e-06	110877310/110942196/110872538/110942186/110864906/110879666/110890423/110921758/110935819/110871505/110944637	LOC110877310/LOC110942196/LOC110872538/LOC110942186/LOC110864906/LOC110879666/LOC110890423/LOC110921758/LOC110935819/LOC110871505/LOC110944637	11
CC	GO:0009538	photosystem I reaction center	8/342	11/3589	8.03196e-07	8.75484e-06	110926335/110920884/110873481/110894225/110910438/110894458/110889561/110899054	LOC110926335/LOC110920884/LOC110873481/LOC110894225/LOC110910438/LOC110894458/LOC110889561/LOC110899054	8
BP	GO:0009108	coenzyme biosynthetic process	29/1061	106/10643	2.92527e-07	1.48864e-05	110880108/110895845/110912883/110890891/110925931/110935992/110909022/110899036/110916150/110915413/110930517/110899468/110891332/110865490/110912366/110879516/110878007/110879833/110882039/110904492/110864940/110868285/110884250/110916544/110874405/110905169/110941174/110910129/110864837	LOC110880108/LOC110895845/LOC110912883/LOC110890891/LOC110925931/LOC110935992/LOC110909022/LOC110899036/LOC110916150/LOC110915413/LOC110930517/LOC110899468/LOC110891332/LOC110865490/LOC110912366/LOC110879516/LOC110878007/LOC110879833/LOC110882039/LOC110904492/LOC110864940/LOC110868285/LOC110884250/LOC110916544/LOC110874405/LOC110905169/LOC110941174/LOC110910129/LOC110864837	29
BP	GO:0006081	cellular aldehyde metabolic process	11/1061	19/10643	3.26824e-07	1.49685e-05	110880108/110872284/110868740/110865490/110872908/110879833/110903846/110874405/110911456/110894631/110904982	LOC110880108/LOC110872284/LOC110868740/LOC110865490/LOC110872908/LOC110879833/LOC110903846/LOC110874405/LOC110911456/LOC110894631/LOC110904982	11
MF	GO:0051536	iron-sulfur cluster binding	24/1500	81/16726	9.26838e-08	1.58953e-05	110897428/110918821/110929744/110898900/110868905/110908712/110922567/110921665/110913069/110918142/110884643/110891035/110897818/110916544/110868020/110940632/110884272/110885081/110936057/110936810/110915949/110929873/110938246/110898389	LOC110897428/LOC110918821/LOC110929744/LOC110898900/LOC110868905/LOC110908712/LOC110922567/LOC110921665/LOC110913069/LOC110918142/LOC110884643/LOC110891035/LOC110897818/LOC110916544/LOC110868020/LOC110940632/LOC110884272/LOC110885081/LOC110936057/LOC110936810/LOC110915949/LOC110929873/LOC110938246/LOC110898389	24
MF	GO:0051540	metal cluster binding	24/1500	81/16726	9.26838e-08	1.58953e-05	110897428/110918821/110929744/110898900/110868905/110908712/110922567/110921665/110913069/110918142/110884643/110891035/110897818/110916544/110868020/110940632/110884272/110885081/110936057/110936810/110915949/110929873/110938246/110898389	LOC110897428/LOC110918821/LOC110929744/LOC110898900/LOC110868905/LOC110908712/LOC110922567/LOC110921665/LOC110913069/LOC110918142/LOC110884643/LOC110891035/LOC110897818/LOC110916544/LOC110868020/LOC110940632/LOC110884272/LOC110885081/LOC110936057/LOC110936810/LOC110915949/LOC110929873/LOC110938246/LOC110898389	24
BP	GO:0009117	nucleotide metabolic process	40/1061	178/10643	6.02891e-07	2.51022e-05	110895845/110912883/110910056/110939630/110868740/110898552/110942324/110925931/110910794/110935992/110909022/110899036/110916150/110915413/110930517/110899468/110891332/110912366/110879516/110872908/110878007/110942326/110883824/110882039/110905172/novel.4704/110864940/110903846/110916544/110864880/110893776/110886942/110921418/110911456/110905169/110897855/110894631/110872003/110935487/novel.47…	LOC110895845/LOC110912883/LOC110910056/LOC110939630/LOC110868740/LOC110898552/LOC110942324/LOC110925931/LOC110910794/LOC110935992/LOC110909022/LOC110899036/LOC110916150/LOC110915413/LOC110930517/LOC110899468/LOC110891332/LOC110912366/LOC110879516/LOC110872908/LOC110878007/LOC110942326/LOC110883824/LOC110882039/LOC110905172/-/LOC110864940/LOC110903846/LOC110916544/LOC110864880/LOC110893776/LOC1108…	40
BP	GO:0006753	nucleoside phosphate metabolic process	40/1061	181/10643	9.53166e-07	3.63792e-05	110895845/110912883/110910056/110939630/110868740/110898552/110942324/110925931/110910794/110935992/110909022/110899036/110916150/110915413/110930517/110899468/110891332/110912366/110879516/110872908/110878007/110942326/110883824/110882039/110905172/novel.4704/110864940/110903846/110916544/110864880/110893776/110886942/110921418/110911456/110905169/110897855/110894631/110872003/110935487/novel.47…	LOC110895845/LOC110912883/LOC110910056/LOC110939630/LOC110868740/LOC110898552/LOC110942324/LOC110925931/LOC110910794/LOC110935992/LOC110909022/LOC110899036/LOC110916150/LOC110915413/LOC110930517/LOC110899468/LOC110891332/LOC110912366/LOC110879516/LOC110872908/LOC110878007/LOC110942326/LOC110883824/LOC110882039/LOC110905172/-/LOC110864940/LOC110903846/LOC110916544/LOC110864880/LOC110893776/LOC1108…	40
BP	GO:0090407	organophosphate biosynthetic process	40/1061	184/10643	1.48604e-06	4.64394e-05	110880108/110895845/110912883/110890672/110872284/110939630/110898552/110925931/110910794/110935992/110909022/110899036/110916150/110915413/110930517/110899468/110891332/110865490/110904860/110912366/110879516/110878007/110942326/110879833/110883824/110882039/novel.4704/110864940/110916544/110874405/110864880/110893776/110886942/110921418/110905169/110897855/110904982/110910129/110864837/novel.47…	LOC110880108/LOC110895845/LOC110912883/LOC110890672/LOC110872284/LOC110939630/LOC110898552/LOC110925931/LOC110910794/LOC110935992/LOC110909022/LOC110899036/LOC110916150/LOC110915413/LOC110930517/LOC110899468/LOC110891332/LOC110865490/LOC110904860/LOC110912366/LOC110879516/LOC110878007/LOC110942326/LOC110879833/LOC110883824/LOC110882039/-/LOC110864940/LOC110916544/LOC110874405/LOC110864880/LOC1108…	40
BP	GO:0055086	nucleobase-containing small molecule metabolic process	44/1061	211/10643	1.49332e-06	4.64394e-05	110895845/110912883/110910056/110939630/110868740/110898552/110942324/110925931/110910794/110935992/110909022/110881067/110899036/110916150/110915413/110930517/110899468/110891332/110864768/110912366/110879516/110872908/110878007/110942326/110883824/110889052/110882039/110905172/novel.4704/110864940/110903846/110916544/110864880/110893776/110886942/110921418/110911456/110905169/110897855/11089463…	LOC110895845/LOC110912883/LOC110910056/LOC110939630/LOC110868740/LOC110898552/LOC110942324/LOC110925931/LOC110910794/LOC110935992/LOC110909022/LOC110881067/LOC110899036/LOC110916150/LOC110915413/LOC110930517/LOC110899468/LOC110891332/LOC110864768/LOC110912366/LOC110879516/LOC110872908/LOC110878007/LOC110942326/LOC110883824/LOC110889052/LOC110882039/LOC110905172/-/LOC110864940/LOC110903846/LOC1109…	44
BP	GO:0006754	ATP biosynthetic process	25/1061	92/10643	2.1859e-06	4.64394e-05	110912883/110939630/110898552/110925931/110910794/110935992/110909022/110899036/110916150/110915413/110930517/110899468/110891332/110879516/110878007/110942326/110883824/110882039/novel.4704/110864940/110864880/110893776/110886942/110905169/novel.4718	LOC110912883/LOC110939630/LOC110898552/LOC110925931/LOC110910794/LOC110935992/LOC110909022/LOC110899036/LOC110916150/LOC110915413/LOC110930517/LOC110899468/LOC110891332/LOC110879516/LOC110878007/LOC110942326/LOC110883824/LOC110882039/-/LOC110864940/LOC110864880/LOC110893776/LOC110886942/LOC110905169/-	25
BP	GO:0009127	purine nucleoside monophosphate biosynthetic process	26/1061	98/10643	2.25277e-06	4.64394e-05	110912883/110939630/110898552/110925931/110910794/110935992/110909022/110899036/110916150/110915413/110930517/110899468/110891332/110879516/110878007/110942326/110883824/110882039/novel.4704/110864940/110864880/110893776/110886942/110905169/110897855/novel.4718	LOC110912883/LOC110939630/LOC110898552/LOC110925931/LOC110910794/LOC110935992/LOC110909022/LOC110899036/LOC110916150/LOC110915413/LOC110930517/LOC110899468/LOC110891332/LOC110879516/LOC110878007/LOC110942326/LOC110883824/LOC110882039/-/LOC110864940/LOC110864880/LOC110893776/LOC110886942/LOC110905169/LOC110897855/-	26
BP	GO:0009142	nucleoside triphosphate biosynthetic process	26/1061	98/10643	2.25277e-06	4.64394e-05	110912883/110939630/110898552/110925931/110910794/110935992/110909022/110899036/110916150/110915413/110930517/110899468/110891332/110879516/110878007/110942326/110883824/110882039/novel.4704/110864940/110864880/110893776/110886942/110921418/110905169/novel.4718	LOC110912883/LOC110939630/LOC110898552/LOC110925931/LOC110910794/LOC110935992/LOC110909022/LOC110899036/LOC110916150/LOC110915413/LOC110930517/LOC110899468/LOC110891332/LOC110879516/LOC110878007/LOC110942326/LOC110883824/LOC110882039/-/LOC110864940/LOC110864880/LOC110893776/LOC110886942/LOC110921418/LOC110905169/-	26
BP	GO:0009145	purine nucleoside triphosphate biosynthetic process	26/1061	98/10643	2.25277e-06	4.64394e-05	110912883/110939630/110898552/110925931/110910794/110935992/110909022/110899036/110916150/110915413/110930517/110899468/110891332/110879516/110878007/110942326/110883824/110882039/novel.4704/110864940/110864880/110893776/110886942/110921418/110905169/novel.4718	LOC110912883/LOC110939630/LOC110898552/LOC110925931/LOC110910794/LOC110935992/LOC110909022/LOC110899036/LOC110916150/LOC110915413/LOC110930517/LOC110899468/LOC110891332/LOC110879516/LOC110878007/LOC110942326/LOC110883824/LOC110882039/-/LOC110864940/LOC110864880/LOC110893776/LOC110886942/LOC110921418/LOC110905169/-	26
BP	GO:0009156	ribonucleoside monophosphate biosynthetic process	26/1061	98/10643	2.25277e-06	4.64394e-05	110912883/110939630/110898552/110925931/110910794/110935992/110909022/110899036/110916150/110915413/110930517/110899468/110891332/110879516/110878007/110942326/110883824/110882039/novel.4704/110864940/110864880/110893776/110886942/110905169/110897855/novel.4718	LOC110912883/LOC110939630/LOC110898552/LOC110925931/LOC110910794/LOC110935992/LOC110909022/LOC110899036/LOC110916150/LOC110915413/LOC110930517/LOC110899468/LOC110891332/LOC110879516/LOC110878007/LOC110942326/LOC110883824/LOC110882039/-/LOC110864940/LOC110864880/LOC110893776/LOC110886942/LOC110905169/LOC110897855/-	26
BP	GO:0009168	purine ribonucleoside monophosphate biosynthetic process	26/1061	98/10643	2.25277e-06	4.64394e-05	110912883/110939630/110898552/110925931/110910794/110935992/110909022/110899036/110916150/110915413/110930517/110899468/110891332/110879516/110878007/110942326/110883824/110882039/novel.4704/110864940/110864880/110893776/110886942/110905169/110897855/novel.4718	LOC110912883/LOC110939630/LOC110898552/LOC110925931/LOC110910794/LOC110935992/LOC110909022/LOC110899036/LOC110916150/LOC110915413/LOC110930517/LOC110899468/LOC110891332/LOC110879516/LOC110878007/LOC110942326/LOC110883824/LOC110882039/-/LOC110864940/LOC110864880/LOC110893776/LOC110886942/LOC110905169/LOC110897855/-	26
BP	GO:0009201	ribonucleoside triphosphate biosynthetic process	26/1061	98/10643	2.25277e-06	4.64394e-05	110912883/110939630/110898552/110925931/110910794/110935992/110909022/110899036/110916150/110915413/110930517/110899468/110891332/110879516/110878007/110942326/110883824/110882039/novel.4704/110864940/110864880/110893776/110886942/110921418/110905169/novel.4718	LOC110912883/LOC110939630/LOC110898552/LOC110925931/LOC110910794/LOC110935992/LOC110909022/LOC110899036/LOC110916150/LOC110915413/LOC110930517/LOC110899468/LOC110891332/LOC110879516/LOC110878007/LOC110942326/LOC110883824/LOC110882039/-/LOC110864940/LOC110864880/LOC110893776/LOC110886942/LOC110921418/LOC110905169/-	26
BP	GO:0009206	purine ribonucleoside triphosphate biosynthetic process	26/1061	98/10643	2.25277e-06	4.64394e-05	110912883/110939630/110898552/110925931/110910794/110935992/110909022/110899036/110916150/110915413/110930517/110899468/110891332/110879516/110878007/110942326/110883824/110882039/novel.4704/110864940/110864880/110893776/110886942/110921418/110905169/novel.4718	LOC110912883/LOC110939630/LOC110898552/LOC110925931/LOC110910794/LOC110935992/LOC110909022/LOC110899036/LOC110916150/LOC110915413/LOC110930517/LOC110899468/LOC110891332/LOC110879516/LOC110878007/LOC110942326/LOC110883824/LOC110882039/-/LOC110864940/LOC110864880/LOC110893776/LOC110886942/LOC110921418/LOC110905169/-	26
BP	GO:0019362	pyridine nucleotide metabolic process	23/1061	81/10643	2.4335e-06	4.64394e-05	110895845/110912883/110868740/110925931/110935992/110909022/110899036/110916150/110915413/110930517/110899468/110891332/110912366/110879516/110872908/110878007/110882039/110864940/110903846/110916544/110911456/110905169/110894631	LOC110895845/LOC110912883/LOC110868740/LOC110925931/LOC110935992/LOC110909022/LOC110899036/LOC110916150/LOC110915413/LOC110930517/LOC110899468/LOC110891332/LOC110912366/LOC110879516/LOC110872908/LOC110878007/LOC110882039/LOC110864940/LOC110903846/LOC110916544/LOC110911456/LOC110905169/LOC110894631	23
BP	GO:0046496	nicotinamide nucleotide metabolic process	23/1061	81/10643	2.4335e-06	4.64394e-05	110895845/110912883/110868740/110925931/110935992/110909022/110899036/110916150/110915413/110930517/110899468/110891332/110912366/110879516/110872908/110878007/110882039/110864940/110903846/110916544/110911456/110905169/110894631	LOC110895845/LOC110912883/LOC110868740/LOC110925931/LOC110935992/LOC110909022/LOC110899036/LOC110916150/LOC110915413/LOC110930517/LOC110899468/LOC110891332/LOC110912366/LOC110879516/LOC110872908/LOC110878007/LOC110882039/LOC110864940/LOC110903846/LOC110916544/LOC110911456/LOC110905169/LOC110894631	23
BP	GO:0072522	purine-containing compound biosynthetic process	28/1061	112/10643	3.33077e-06	5.84893e-05	110912883/110939630/110898552/110925931/110910794/110935992/110909022/110899036/110916150/110915413/110930517/110899468/110891332/110879516/110878007/110942326/110883824/110882039/novel.4704/110864940/110864880/110893776/110886942/110921418/110905169/110897855/110865304/novel.4718	LOC110912883/LOC110939630/LOC110898552/LOC110925931/LOC110910794/LOC110935992/LOC110909022/LOC110899036/LOC110916150/LOC110915413/LOC110930517/LOC110899468/LOC110891332/LOC110879516/LOC110878007/LOC110942326/LOC110883824/LOC110882039/-/LOC110864940/LOC110864880/LOC110893776/LOC110886942/LOC110921418/LOC110905169/LOC110897855/LOC110865304/-	28
BP	GO:0009124	nucleoside monophosphate biosynthetic process	26/1061	100/10643	3.39488e-06	5.84893e-05	110912883/110939630/110898552/110925931/110910794/110935992/110909022/110899036/110916150/110915413/110930517/110899468/110891332/110879516/110878007/110942326/110883824/110882039/novel.4704/110864940/110864880/110893776/110886942/110905169/110897855/novel.4718	LOC110912883/LOC110939630/LOC110898552/LOC110925931/LOC110910794/LOC110935992/LOC110909022/LOC110899036/LOC110916150/LOC110915413/LOC110930517/LOC110899468/LOC110891332/LOC110879516/LOC110878007/LOC110942326/LOC110883824/LOC110882039/-/LOC110864940/LOC110864880/LOC110893776/LOC110886942/LOC110905169/LOC110897855/-	26
BP	GO:0072525	pyridine-containing compound biosynthetic process	22/1061	77/10643	3.58618e-06	5.84893e-05	110880108/110895845/110912883/110925931/110935992/110909022/110899036/110916150/110915413/110930517/110899468/110891332/110865490/110912366/110879516/110878007/110879833/110882039/110864940/110916544/110874405/110905169	LOC110880108/LOC110895845/LOC110912883/LOC110925931/LOC110935992/LOC110909022/LOC110899036/LOC110916150/LOC110915413/LOC110930517/LOC110899468/LOC110891332/LOC110865490/LOC110912366/LOC110879516/LOC110878007/LOC110879833/LOC110882039/LOC110864940/LOC110916544/LOC110874405/LOC110905169	22
BP	GO:0072521	purine-containing compound metabolic process	33/1061	144/10643	3.66185e-06	5.84893e-05	110912883/110910056/110939630/110898552/110942324/110925931/110910794/110935992/110909022/110899036/110916150/110915413/110930517/110899468/110891332/110879516/110878007/110942326/110883824/110882039/110905172/novel.4704/110864940/110864880/110893776/110886942/110921418/110905169/110897855/110865304/110872003/110935487/novel.4718	LOC110912883/LOC110910056/LOC110939630/LOC110898552/LOC110942324/LOC110925931/LOC110910794/LOC110935992/LOC110909022/LOC110899036/LOC110916150/LOC110915413/LOC110930517/LOC110899468/LOC110891332/LOC110879516/LOC110878007/LOC110942326/LOC110883824/LOC110882039/LOC110905172/-/LOC110864940/LOC110864880/LOC110893776/LOC110886942/LOC110921418/LOC110905169/LOC110897855/LOC110865304/LOC110872003/LOC1109…	33
BP	GO:0009073	aromatic amino acid family biosynthetic process	10/1061	19/10643	3.70347e-06	5.84893e-05	110913018/110883802/110926857/110919696/110942378/110877928/110941290/110868551/110909005/110904216	LOC110913018/LOC110883802/LOC110926857/LOC110919696/LOC110942378/LOC110877928/LOC110941290/LOC110868551/LOC110909005/LOC110904216	10
BP	GO:0009152	purine ribonucleotide biosynthetic process	27/1061	107/10643	4.10623e-06	5.87704e-05	110912883/110939630/110898552/110925931/110910794/110935992/110909022/110899036/110916150/110915413/110930517/110899468/110891332/110879516/110878007/110942326/110883824/110882039/novel.4704/110864940/110864880/110893776/110886942/110921418/110905169/110897855/novel.4718	LOC110912883/LOC110939630/LOC110898552/LOC110925931/LOC110910794/LOC110935992/LOC110909022/LOC110899036/LOC110916150/LOC110915413/LOC110930517/LOC110899468/LOC110891332/LOC110879516/LOC110878007/LOC110942326/LOC110883824/LOC110882039/-/LOC110864940/LOC110864880/LOC110893776/LOC110886942/LOC110921418/LOC110905169/LOC110897855/-	27
BP	GO:0009260	ribonucleotide biosynthetic process	27/1061	107/10643	4.10623e-06	5.87704e-05	110912883/110939630/110898552/110925931/110910794/110935992/110909022/110899036/110916150/110915413/110930517/110899468/110891332/110879516/110878007/110942326/110883824/110882039/novel.4704/110864940/110864880/110893776/110886942/110921418/110905169/110897855/novel.4718	LOC110912883/LOC110939630/LOC110898552/LOC110925931/LOC110910794/LOC110935992/LOC110909022/LOC110899036/LOC110916150/LOC110915413/LOC110930517/LOC110899468/LOC110891332/LOC110879516/LOC110878007/LOC110942326/LOC110883824/LOC110882039/-/LOC110864940/LOC110864880/LOC110893776/LOC110886942/LOC110921418/LOC110905169/LOC110897855/-	27
BP	GO:0046390	ribose phosphate biosynthetic process	27/1061	107/10643	4.10623e-06	5.87704e-05	110912883/110939630/110898552/110925931/110910794/110935992/110909022/110899036/110916150/110915413/110930517/110899468/110891332/110879516/110878007/110942326/110883824/110882039/novel.4704/110864940/110864880/110893776/110886942/110921418/110905169/110897855/novel.4718	LOC110912883/LOC110939630/LOC110898552/LOC110925931/LOC110910794/LOC110935992/LOC110909022/LOC110899036/LOC110916150/LOC110915413/LOC110930517/LOC110899468/LOC110891332/LOC110879516/LOC110878007/LOC110942326/LOC110883824/LOC110882039/-/LOC110864940/LOC110864880/LOC110893776/LOC110886942/LOC110921418/LOC110905169/LOC110897855/-	27
BP	GO:0006082	organic acid metabolic process	65/1061	373/10643	4.5571e-06	6.04801e-05	110913018/110928848/110912883/110890891/110883802/110890752/110926857/110919696/110877764/110872284/110928568/110865084/110922047/110925931/110894710/110935992/110868707/110909022/110899036/110906664/110916150/110915413/110930517/110899468/110942378/110926487/110891332/110879516/110877928/110920890/110930570/110886001/110878007/110873277/110917085/110904523/110868287/110941290/110921564/110882039…	LOC110913018/LOC110928848/LOC110912883/LOC110890891/LOC110883802/LOC110890752/LOC110926857/LOC110919696/LOC110877764/LOC110872284/LOC110928568/LOC110865084/LOC110922047/LOC110925931/LOC110894710/LOC110935992/LOC110868707/LOC110909022/LOC110899036/LOC110906664/LOC110916150/LOC110915413/LOC110930517/LOC110899468/LOC110942378/LOC110926487/LOC110891332/LOC110879516/LOC110877928/LOC110920890/LOC110930…	65
BP	GO:0009150	purine ribonucleotide metabolic process	32/1061	139/10643	4.62184e-06	6.04801e-05	110912883/110910056/110939630/110898552/110942324/110925931/110910794/110935992/110909022/110899036/110916150/110915413/110930517/110899468/110891332/110879516/110878007/110942326/110883824/110882039/110905172/novel.4704/110864940/110864880/110893776/110886942/110921418/110905169/110897855/110872003/110935487/novel.4718	LOC110912883/LOC110910056/LOC110939630/LOC110898552/LOC110942324/LOC110925931/LOC110910794/LOC110935992/LOC110909022/LOC110899036/LOC110916150/LOC110915413/LOC110930517/LOC110899468/LOC110891332/LOC110879516/LOC110878007/LOC110942326/LOC110883824/LOC110882039/LOC110905172/-/LOC110864940/LOC110864880/LOC110893776/LOC110886942/LOC110921418/LOC110905169/LOC110897855/LOC110872003/LOC110935487/-	32
BP	GO:0009259	ribonucleotide metabolic process	32/1061	139/10643	4.62184e-06	6.04801e-05	110912883/110910056/110939630/110898552/110942324/110925931/110910794/110935992/110909022/110899036/110916150/110915413/110930517/110899468/110891332/110879516/110878007/110942326/110883824/110882039/110905172/novel.4704/110864940/110864880/110893776/110886942/110921418/110905169/110897855/110872003/110935487/novel.4718	LOC110912883/LOC110910056/LOC110939630/LOC110898552/LOC110942324/LOC110925931/LOC110910794/LOC110935992/LOC110909022/LOC110899036/LOC110916150/LOC110915413/LOC110930517/LOC110899468/LOC110891332/LOC110879516/LOC110878007/LOC110942326/LOC110883824/LOC110882039/LOC110905172/-/LOC110864940/LOC110864880/LOC110893776/LOC110886942/LOC110921418/LOC110905169/LOC110897855/LOC110872003/LOC110935487/-	32
CC	GO:1990204	oxidoreductase complex	11/342	25/3589	6.56963e-06	6.5099e-05	110877310/110942196/110872538/110942186/110864906/110879666/110890423/110921758/110935819/110871505/110944637	LOC110877310/LOC110942196/LOC110872538/LOC110942186/LOC110864906/LOC110879666/LOC110890423/LOC110921758/LOC110935819/LOC110871505/LOC110944637	11
BP	GO:0006733	oxidoreduction coenzyme metabolic process	23/1061	85/10643	5.98094e-06	7.60909e-05	110895845/110912883/110868740/110925931/110935992/110909022/110899036/110916150/110915413/110930517/110899468/110891332/110912366/110879516/110872908/110878007/110882039/110864940/110903846/110916544/110911456/110905169/110894631	LOC110895845/LOC110912883/LOC110868740/LOC110925931/LOC110935992/LOC110909022/LOC110899036/LOC110916150/LOC110915413/LOC110930517/LOC110899468/LOC110891332/LOC110912366/LOC110879516/LOC110872908/LOC110878007/LOC110882039/LOC110864940/LOC110903846/LOC110916544/LOC110911456/LOC110905169/LOC110894631	23
BP	GO:0006164	purine nucleotide biosynthetic process	27/1061	110/10643	7.19128e-06	8.90164e-05	110912883/110939630/110898552/110925931/110910794/110935992/110909022/110899036/110916150/110915413/110930517/110899468/110891332/110879516/110878007/110942326/110883824/110882039/novel.4704/110864940/110864880/110893776/110886942/110921418/110905169/110897855/novel.4718	LOC110912883/LOC110939630/LOC110898552/LOC110925931/LOC110910794/LOC110935992/LOC110909022/LOC110899036/LOC110916150/LOC110915413/LOC110930517/LOC110899468/LOC110891332/LOC110879516/LOC110878007/LOC110942326/LOC110883824/LOC110882039/-/LOC110864940/LOC110864880/LOC110893776/LOC110886942/LOC110921418/LOC110905169/LOC110897855/-	27
BP	GO:0006163	purine nucleotide metabolic process	32/1061	142/10643	7.45154e-06	8.91661e-05	110912883/110910056/110939630/110898552/110942324/110925931/110910794/110935992/110909022/110899036/110916150/110915413/110930517/110899468/110891332/110879516/110878007/110942326/110883824/110882039/110905172/novel.4704/110864940/110864880/110893776/110886942/110921418/110905169/110897855/110872003/110935487/novel.4718	LOC110912883/LOC110910056/LOC110939630/LOC110898552/LOC110942324/LOC110925931/LOC110910794/LOC110935992/LOC110909022/LOC110899036/LOC110916150/LOC110915413/LOC110930517/LOC110899468/LOC110891332/LOC110879516/LOC110878007/LOC110942326/LOC110883824/LOC110882039/LOC110905172/-/LOC110864940/LOC110864880/LOC110893776/LOC110886942/LOC110921418/LOC110905169/LOC110897855/LOC110872003/LOC110935487/-	32
BP	GO:0043436	oxoacid metabolic process	64/1061	371/10643	7.59275e-06	8.91661e-05	110913018/110928848/110912883/110890891/110883802/110890752/110926857/110919696/110877764/110872284/110928568/110865084/110922047/110925931/110894710/110935992/110868707/110909022/110899036/110906664/110916150/110915413/110930517/110899468/110942378/110926487/110891332/110879516/110877928/110920890/110930570/110886001/110878007/110873277/110917085/110904523/110868287/110941290/110921564/110882039…	LOC110913018/LOC110928848/LOC110912883/LOC110890891/LOC110883802/LOC110890752/LOC110926857/LOC110919696/LOC110877764/LOC110872284/LOC110928568/LOC110865084/LOC110922047/LOC110925931/LOC110894710/LOC110935992/LOC110868707/LOC110909022/LOC110899036/LOC110906664/LOC110916150/LOC110915413/LOC110930517/LOC110899468/LOC110942378/LOC110926487/LOC110891332/LOC110879516/LOC110877928/LOC110920890/LOC110930…	64
BP	GO:0019752	carboxylic acid metabolic process	63/1061	366/10643	9.60917e-06	0.000110025	110913018/110928848/110912883/110890891/110883802/110890752/110926857/110919696/110877764/110872284/110928568/110865084/110922047/110925931/110894710/110935992/110868707/110909022/110899036/110906664/110916150/110915413/110930517/110899468/110942378/110926487/110891332/110879516/110877928/110920890/110930570/110886001/110878007/110873277/110917085/110904523/110868287/110941290/110921564/110882039…	LOC110913018/LOC110928848/LOC110912883/LOC110890891/LOC110883802/LOC110890752/LOC110926857/LOC110919696/LOC110877764/LOC110872284/LOC110928568/LOC110865084/LOC110922047/LOC110925931/LOC110894710/LOC110935992/LOC110868707/LOC110909022/LOC110899036/LOC110906664/LOC110916150/LOC110915413/LOC110930517/LOC110899468/LOC110942378/LOC110926487/LOC110891332/LOC110879516/LOC110877928/LOC110920890/LOC110930…	63
BP	GO:0009126	purine nucleoside monophosphate metabolic process	27/1061	115/10643	1.72771e-05	0.000184021	110912883/110939630/110898552/110925931/110910794/110935992/110909022/110899036/110916150/110915413/110930517/110899468/110891332/110879516/110878007/110942326/110883824/110882039/novel.4704/110864940/110864880/110893776/110886942/110905169/110897855/110872003/novel.4718	LOC110912883/LOC110939630/LOC110898552/LOC110925931/LOC110910794/LOC110935992/LOC110909022/LOC110899036/LOC110916150/LOC110915413/LOC110930517/LOC110899468/LOC110891332/LOC110879516/LOC110878007/LOC110942326/LOC110883824/LOC110882039/-/LOC110864940/LOC110864880/LOC110893776/LOC110886942/LOC110905169/LOC110897855/LOC110872003/-	27
BP	GO:0009161	ribonucleoside monophosphate metabolic process	27/1061	115/10643	1.72771e-05	0.000184021	110912883/110939630/110898552/110925931/110910794/110935992/110909022/110899036/110916150/110915413/110930517/110899468/110891332/110879516/110878007/110942326/110883824/110882039/novel.4704/110864940/110864880/110893776/110886942/110905169/110897855/110872003/novel.4718	LOC110912883/LOC110939630/LOC110898552/LOC110925931/LOC110910794/LOC110935992/LOC110909022/LOC110899036/LOC110916150/LOC110915413/LOC110930517/LOC110899468/LOC110891332/LOC110879516/LOC110878007/LOC110942326/LOC110883824/LOC110882039/-/LOC110864940/LOC110864880/LOC110893776/LOC110886942/LOC110905169/LOC110897855/LOC110872003/-	27
BP	GO:0009167	purine ribonucleoside monophosphate metabolic process	27/1061	115/10643	1.72771e-05	0.000184021	110912883/110939630/110898552/110925931/110910794/110935992/110909022/110899036/110916150/110915413/110930517/110899468/110891332/110879516/110878007/110942326/110883824/110882039/novel.4704/110864940/110864880/110893776/110886942/110905169/110897855/110872003/novel.4718	LOC110912883/LOC110939630/LOC110898552/LOC110925931/LOC110910794/LOC110935992/LOC110909022/LOC110899036/LOC110916150/LOC110915413/LOC110930517/LOC110899468/LOC110891332/LOC110879516/LOC110878007/LOC110942326/LOC110883824/LOC110882039/-/LOC110864940/LOC110864880/LOC110893776/LOC110886942/LOC110905169/LOC110897855/LOC110872003/-	27
MF	GO:0004222	metalloendopeptidase activity	18/1500	58/16726	1.75228e-06	0.0001856	110920947/110872721/110908056/110895374/110865979/110921620/110867937/110898244/110905163/110911045/110920608/110926421/110865547/110897727/110899516/110904426/110885167/110940295	LOC110920947/LOC110872721/LOC110908056/LOC110895374/LOC110865979/LOC110921620/LOC110867937/LOC110898244/LOC110905163/LOC110911045/LOC110920608/LOC110926421/LOC110865547/LOC110897727/LOC110899516/LOC110904426/LOC110885167/LOC110940295	18
MF	GO:0016853	isomerase activity	33/1500	155/16726	2.16443e-06	0.0001856	110915330/110926551/110939570/110908878/110904663/110926316/110908072/110917722/110928755/110886256/110909989/110930360/110924043/110864768/110879516/110872908/110865198/110878007/110920661/110884435/110923331/110865976/110873843/110915197/110904637/110924034/110911456/110894631/110872723/110911022/110941028/110885446/110865543	LOC110915330/LOC110926551/LOC110939570/LOC110908878/LOC110904663/LOC110926316/LOC110908072/LOC110917722/LOC110928755/LOC110886256/LOC110909989/LOC110930360/LOC110924043/LOC110864768/LOC110879516/LOC110872908/LOC110865198/LOC110878007/LOC110920661/LOC110884435/LOC110923331/LOC110865976/LOC110873843/LOC110915197/LOC110904637/LOC110924034/LOC110911456/LOC110894631/LOC110872723/LOC110911022/LOC110941…	33
BP	GO:0046034	ATP metabolic process	26/1061	109/10643	1.82722e-05	0.000189498	110912883/110939630/110898552/110925931/110910794/110935992/110909022/110899036/110916150/110915413/110930517/110899468/110891332/110879516/110878007/110942326/110883824/110882039/novel.4704/110864940/110864880/110893776/110886942/110905169/110872003/novel.4718	LOC110912883/LOC110939630/LOC110898552/LOC110925931/LOC110910794/LOC110935992/LOC110909022/LOC110899036/LOC110916150/LOC110915413/LOC110930517/LOC110899468/LOC110891332/LOC110879516/LOC110878007/LOC110942326/LOC110883824/LOC110882039/-/LOC110864940/LOC110864880/LOC110893776/LOC110886942/LOC110905169/LOC110872003/-	26
BP	GO:0009165	nucleotide biosynthetic process	30/1061	135/10643	1.90325e-05	0.000189498	110895845/110912883/110939630/110898552/110925931/110910794/110935992/110909022/110899036/110916150/110915413/110930517/110899468/110891332/110912366/110879516/110878007/110942326/110883824/110882039/novel.4704/110864940/110916544/110864880/110893776/110886942/110921418/110905169/110897855/novel.4718	LOC110895845/LOC110912883/LOC110939630/LOC110898552/LOC110925931/LOC110910794/LOC110935992/LOC110909022/LOC110899036/LOC110916150/LOC110915413/LOC110930517/LOC110899468/LOC110891332/LOC110912366/LOC110879516/LOC110878007/LOC110942326/LOC110883824/LOC110882039/-/LOC110864940/LOC110916544/LOC110864880/LOC110893776/LOC110886942/LOC110921418/LOC110905169/LOC110897855/-	30
BP	GO:1901293	nucleoside phosphate biosynthetic process	30/1061	135/10643	1.90325e-05	0.000189498	110895845/110912883/110939630/110898552/110925931/110910794/110935992/110909022/110899036/110916150/110915413/110930517/110899468/110891332/110912366/110879516/110878007/110942326/110883824/110882039/novel.4704/110864940/110916544/110864880/110893776/110886942/110921418/110905169/110897855/novel.4718	LOC110895845/LOC110912883/LOC110939630/LOC110898552/LOC110925931/LOC110910794/LOC110935992/LOC110909022/LOC110899036/LOC110916150/LOC110915413/LOC110930517/LOC110899468/LOC110891332/LOC110912366/LOC110879516/LOC110878007/LOC110942326/LOC110883824/LOC110882039/-/LOC110864940/LOC110916544/LOC110864880/LOC110893776/LOC110886942/LOC110921418/LOC110905169/LOC110897855/-	30
BP	GO:0009123	nucleoside monophosphate metabolic process	27/1061	117/10643	2.40764e-05	0.00022054	110912883/110939630/110898552/110925931/110910794/110935992/110909022/110899036/110916150/110915413/110930517/110899468/110891332/110879516/110878007/110942326/110883824/110882039/novel.4704/110864940/110864880/110893776/110886942/110905169/110897855/110872003/novel.4718	LOC110912883/LOC110939630/LOC110898552/LOC110925931/LOC110910794/LOC110935992/LOC110909022/LOC110899036/LOC110916150/LOC110915413/LOC110930517/LOC110899468/LOC110891332/LOC110879516/LOC110878007/LOC110942326/LOC110883824/LOC110882039/-/LOC110864940/LOC110864880/LOC110893776/LOC110886942/LOC110905169/LOC110897855/LOC110872003/-	27
BP	GO:0009144	purine nucleoside triphosphate metabolic process	27/1061	117/10643	2.40764e-05	0.00022054	110912883/110939630/110898552/110925931/110910794/110935992/110909022/110899036/110916150/110915413/110930517/110899468/110891332/110879516/110878007/110942326/110883824/110882039/novel.4704/110864940/110864880/110893776/110886942/110921418/110905169/110872003/novel.4718	LOC110912883/LOC110939630/LOC110898552/LOC110925931/LOC110910794/LOC110935992/LOC110909022/LOC110899036/LOC110916150/LOC110915413/LOC110930517/LOC110899468/LOC110891332/LOC110879516/LOC110878007/LOC110942326/LOC110883824/LOC110882039/-/LOC110864940/LOC110864880/LOC110893776/LOC110886942/LOC110921418/LOC110905169/LOC110872003/-	27
BP	GO:0009199	ribonucleoside triphosphate metabolic process	27/1061	117/10643	2.40764e-05	0.00022054	110912883/110939630/110898552/110925931/110910794/110935992/110909022/110899036/110916150/110915413/110930517/110899468/110891332/110879516/110878007/110942326/110883824/110882039/novel.4704/110864940/110864880/110893776/110886942/110921418/110905169/110872003/novel.4718	LOC110912883/LOC110939630/LOC110898552/LOC110925931/LOC110910794/LOC110935992/LOC110909022/LOC110899036/LOC110916150/LOC110915413/LOC110930517/LOC110899468/LOC110891332/LOC110879516/LOC110878007/LOC110942326/LOC110883824/LOC110882039/-/LOC110864940/LOC110864880/LOC110893776/LOC110886942/LOC110921418/LOC110905169/LOC110872003/-	27
BP	GO:0009205	purine ribonucleoside triphosphate metabolic process	27/1061	117/10643	2.40764e-05	0.00022054	110912883/110939630/110898552/110925931/110910794/110935992/110909022/110899036/110916150/110915413/110930517/110899468/110891332/110879516/110878007/110942326/110883824/110882039/novel.4704/110864940/110864880/110893776/110886942/110921418/110905169/110872003/novel.4718	LOC110912883/LOC110939630/LOC110898552/LOC110925931/LOC110910794/LOC110935992/LOC110909022/LOC110899036/LOC110916150/LOC110915413/LOC110930517/LOC110899468/LOC110891332/LOC110879516/LOC110878007/LOC110942326/LOC110883824/LOC110882039/-/LOC110864940/LOC110864880/LOC110893776/LOC110886942/LOC110921418/LOC110905169/LOC110872003/-	27
MF	GO:0016765	transferase activity, transferring alkyl or aryl (other than methyl) groups	14/1500	39/16726	3.59839e-06	0.000235253	110883802/110919696/110865767/110917211/110942378/110937749/110941290/110904492/110868285/110909005/110926293/110878709/110941174/110941586	LOC110883802/LOC110919696/LOC110865767/LOC110917211/LOC110942378/LOC110937749/LOC110941290/LOC110904492/LOC110868285/LOC110909005/LOC110926293/LOC110878709/LOC110941174/LOC110941586	14
MF	GO:0008237	metallopeptidase activity	19/1500	67/16726	4.11522e-06	0.000235253	110920947/110872721/110908056/110895374/110865979/110921620/110867937/110898244/110905163/110911045/110920608/110926421/110865547/110897727/110899516/110899584/110904426/110885167/110940295	LOC110920947/LOC110872721/LOC110908056/LOC110895374/LOC110865979/LOC110921620/LOC110867937/LOC110898244/LOC110905163/LOC110911045/LOC110920608/LOC110926421/LOC110865547/LOC110897727/LOC110899516/LOC110899584/LOC110904426/LOC110885167/LOC110940295	19
BP	GO:0009141	nucleoside triphosphate metabolic process	27/1061	119/10643	3.32149e-05	0.000298283	110912883/110939630/110898552/110925931/110910794/110935992/110909022/110899036/110916150/110915413/110930517/110899468/110891332/110879516/110878007/110942326/110883824/110882039/novel.4704/110864940/110864880/110893776/110886942/110921418/110905169/110872003/novel.4718	LOC110912883/LOC110939630/LOC110898552/LOC110925931/LOC110910794/LOC110935992/LOC110909022/LOC110899036/LOC110916150/LOC110915413/LOC110930517/LOC110899468/LOC110891332/LOC110879516/LOC110878007/LOC110942326/LOC110883824/LOC110882039/-/LOC110864940/LOC110864880/LOC110893776/LOC110886942/LOC110921418/LOC110905169/LOC110872003/-	27
CC	GO:0019898	extrinsic component of membrane	9/342	20/3589	3.79169e-05	0.000344412	110877310/110942196/110872538/110864906/110879666/110890423/110921758/110935819/110944637	LOC110877310/LOC110942196/LOC110872538/LOC110864906/LOC110879666/LOC110890423/LOC110921758/LOC110935819/LOC110944637	9
BP	GO:0044283	small molecule biosynthetic process	46/1061	256/10643	5.2203e-05	0.000459788	110913018/110880108/110928848/110912883/110890891/110897428/110883802/110926857/110919696/110928568/110926472/110925931/110935992/110909022/110899036/110916150/110915413/110930517/110899468/110942378/110891332/110865490/110879516/110877928/110878007/110879833/110917085/110868287/110941290/110882039/110868551/110864940/110884250/110909005/110889392/110904216/110874405/110923557/110912807/110917963…	LOC110913018/LOC110880108/LOC110928848/LOC110912883/LOC110890891/LOC110897428/LOC110883802/LOC110926857/LOC110919696/LOC110928568/LOC110926472/LOC110925931/LOC110935992/LOC110909022/LOC110899036/LOC110916150/LOC110915413/LOC110930517/LOC110899468/LOC110942378/LOC110891332/LOC110865490/LOC110879516/LOC110877928/LOC110878007/LOC110879833/LOC110917085/LOC110868287/LOC110941290/LOC110882039/LOC110868…	46
BP	GO:0016052	carbohydrate catabolic process	21/1061	84/10643	5.4788e-05	0.000473451	110921686/110912883/110925931/110935992/110909022/110909989/110899036/110916150/110915413/110930517/110899468/110891332/110879516/110878007/110884435/110882039/110899790/110864940/110942115/110905169/110918860	LOC110921686/LOC110912883/LOC110925931/LOC110935992/LOC110909022/LOC110909989/LOC110899036/LOC110916150/LOC110915413/LOC110930517/LOC110899468/LOC110891332/LOC110879516/LOC110878007/LOC110884435/LOC110882039/LOC110899790/LOC110864940/LOC110942115/LOC110905169/LOC110918860	21
BP	GO:0033013	tetrapyrrole metabolic process	11/1061	29/10643	5.84045e-05	0.000495357	110863854/110879974/110930781/110890086/110923557/110883761/110879462/110923153/110930825/110927100/110941586	LOC110863854/LOC110879974/LOC110930781/LOC110890086/LOC110923557/LOC110883761/LOC110879462/LOC110923153/LOC110930825/LOC110927100/LOC110941586	11
BP	GO:1901135	carbohydrate derivative metabolic process	50/1061	291/10643	8.28338e-05	0.00068978	110912883/110877347/110910056/110899401/110906421/110872284/110939630/110868740/110898552/110942324/110925931/110910794/110935992/110909022/110872399/110881067/110899036/110916150/110915413/110930517/110899468/110891332/110878373/110864768/110865126/110879516/110872908/110878007/110942326/110883824/110889052/110882039/110905172/novel.4704/110864940/110903846/110864880/110928684/110893776/11088694…	LOC110912883/LOC110877347/LOC110910056/LOC110899401/LOC110906421/LOC110872284/LOC110939630/LOC110868740/LOC110898552/LOC110942324/LOC110925931/LOC110910794/LOC110935992/LOC110909022/LOC110872399/LOC110881067/LOC110899036/LOC110916150/LOC110915413/LOC110930517/LOC110899468/LOC110891332/LOC110878373/LOC110864768/LOC110865126/LOC110879516/LOC110872908/LOC110878007/LOC110942326/LOC110883824/LOC110889…	50
MF	GO:0016616	oxidoreductase activity, acting on the CH-OH group of donors, NAD or NADP as acceptor	25/1500	112/16726	1.52291e-05	0.000746228	110895209/110918197/110915392/110894224/110868740/110937331/110864719/110878297/110885627/110878373/110884739/110909316/110921272/110900006/110870314/110903846/110865665/110929908/110891265/110879703/110916505/110926343/110885871/110930717/110903910	LOC110895209/LOC110918197/LOC110915392/LOC110894224/LOC110868740/LOC110937331/LOC110864719/LOC110878297/LOC110885627/LOC110878373/LOC110884739/LOC110909316/LOC110921272/LOC110900006/LOC110870314/LOC110903846/LOC110865665/LOC110929908/LOC110891265/LOC110879703/LOC110916505/LOC110926343/LOC110885871/LOC110930717/LOC110903910	25
BP	GO:0019682	glyceraldehyde-3-phosphate metabolic process	7/1061	13/10643	9.59121e-05	0.000784424	110872284/110868740/110872908/110903846/110911456/110894631/110904982	LOC110872284/LOC110868740/LOC110872908/LOC110903846/LOC110911456/LOC110894631/LOC110904982	7
BP	GO:0006520	cellular amino acid metabolic process	34/1061	175/10643	0.000102574	0.000824191	110913018/110928848/110883802/110926857/110919696/110877764/110928568/110865084/110922047/110894710/110906664/110942378/110926487/110877928/110920890/110930570/110886001/110873277/110904523/110941290/110921564/110868551/110909005/110889392/110904216/110869276/110898235/110908929/110884193/110911054/110898738/110937560/110884133/110929145	LOC110913018/LOC110928848/LOC110883802/LOC110926857/LOC110919696/LOC110877764/LOC110928568/LOC110865084/LOC110922047/LOC110894710/LOC110906664/LOC110942378/LOC110926487/LOC110877928/LOC110920890/LOC110930570/LOC110886001/LOC110873277/LOC110904523/LOC110941290/LOC110921564/LOC110868551/LOC110909005/LOC110889392/LOC110904216/LOC110869276/LOC110898235/LOC110908929/LOC110884193/LOC110911054/LOC110898…	34
BP	GO:0009072	aromatic amino acid family metabolic process	10/1061	26/10643	0.000110904	0.000875757	110913018/110883802/110926857/110919696/110942378/110877928/110941290/110868551/110909005/110904216	LOC110913018/LOC110883802/LOC110926857/LOC110919696/LOC110942378/LOC110877928/LOC110941290/LOC110868551/LOC110909005/LOC110904216	10
BP	GO:0006090	pyruvate metabolic process	17/1061	64/10643	0.00012365	0.000959863	110912883/110872284/110925931/110935992/110909022/110899036/110916150/110915413/110930517/110899468/110891332/110879516/110878007/110882039/110864940/110905169/110904982	LOC110912883/LOC110872284/LOC110925931/LOC110935992/LOC110909022/LOC110899036/LOC110916150/LOC110915413/LOC110930517/LOC110899468/LOC110891332/LOC110879516/LOC110878007/LOC110882039/LOC110864940/LOC110905169/LOC110904982	17
MF	GO:0042578	phosphoric ester hydrolase activity	27/1500	129/16726	2.44298e-05	0.00104743	110897407/110909012/110936866/110926186/110877738/110904141/110903973/110865321/110943969/110868577/110893893/110886438/110880208/110908288/110904916/110920752/110927134/110911202/110890721/110867555/110879070/110911561/110873095/110882959/110937926/110904344/110935446	LOC110897407/LOC110909012/LOC110936866/LOC110926186/LOC110877738/LOC110904141/LOC110903973/LOC110865321/LOC110943969/LOC110868577/LOC110893893/LOC110886438/LOC110880208/LOC110908288/LOC110904916/LOC110920752/LOC110927134/LOC110911202/LOC110890721/LOC110867555/LOC110879070/LOC110911561/LOC110873095/LOC110882959/LOC110937926/LOC110904344/LOC110935446	27
BP	GO:0033014	tetrapyrrole biosynthetic process	9/1061	22/10643	0.000140596	0.00107321	110879974/110930781/110890086/110923557/110883761/110879462/110923153/110930825/110941586	LOC110879974/LOC110930781/LOC110890086/LOC110923557/LOC110883761/LOC110879462/LOC110923153/LOC110930825/LOC110941586	9
BP	GO:0019359	nicotinamide nucleotide biosynthetic process	18/1061	72/10643	0.000183338	0.00135433	110895845/110912883/110925931/110935992/110909022/110899036/110916150/110915413/110930517/110899468/110891332/110912366/110879516/110878007/110882039/110864940/110916544/110905169	LOC110895845/LOC110912883/LOC110925931/LOC110935992/LOC110909022/LOC110899036/LOC110916150/LOC110915413/LOC110930517/LOC110899468/LOC110891332/LOC110912366/LOC110879516/LOC110878007/LOC110882039/LOC110864940/LOC110916544/LOC110905169	18
BP	GO:0019363	pyridine nucleotide biosynthetic process	18/1061	72/10643	0.000183338	0.00135433	110895845/110912883/110925931/110935992/110909022/110899036/110916150/110915413/110930517/110899468/110891332/110912366/110879516/110878007/110882039/110864940/110916544/110905169	LOC110895845/LOC110912883/LOC110925931/LOC110935992/LOC110909022/LOC110899036/LOC110916150/LOC110915413/LOC110930517/LOC110899468/LOC110891332/LOC110912366/LOC110879516/LOC110878007/LOC110882039/LOC110864940/LOC110916544/LOC110905169	18
BP	GO:0006091	generation of precursor metabolites and energy	22/1061	98/10643	0.000204159	0.0014842	novel.2247/110912883/110925931/110935992/110909022/novel.1088/110899036/110916150/110915413/110930517/110899468/110885465/110891332/110879516/110878007/110882039/110864940/110896250/110872125/110912914/110905169/110864866	-/LOC110912883/LOC110925931/LOC110935992/LOC110909022/-/LOC110899036/LOC110916150/LOC110915413/LOC110930517/LOC110899468/LOC110885465/LOC110891332/LOC110879516/LOC110878007/LOC110882039/LOC110864940/LOC110896250/LOC110872125/LOC110912914/LOC110905169/LOC110864866	22
MF	GO:0016861	intramolecular oxidoreductase activity, interconverting aldoses and ketoses	8/1500	17/16726	4.76817e-05	0.0018172	110908072/110879516/110872908/110878007/110923331/110865976/110911456/110894631	LOC110908072/LOC110879516/LOC110872908/LOC110878007/LOC110923331/LOC110865976/LOC110911456/LOC110894631	8
BP	GO:0006790	sulfur compound metabolic process	14/1061	50/10643	0.000265252	0.00189821	110897428/110944547/110864535/110868905/110920573/110873277/110904492/110868285/110889392/110884272/110898235/110941174/110910129/110915949	LOC110897428/LOC110944547/LOC110864535/LOC110868905/LOC110920573/LOC110873277/LOC110904492/LOC110868285/LOC110889392/LOC110884272/LOC110898235/LOC110941174/LOC110910129/LOC110915949	14
MF	GO:0016614	oxidoreductase activity, acting on CH-OH group of donors	33/1500	183/16726	7.97491e-05	0.00273539	110895209/110918197/110929299/110915392/110894224/110865230/110868740/110937331/110865144/110864719/110878297/110885627/110878373/110884739/110890037/110909316/110877473/110921272/110900006/110897396/110870314/110903846/110865665/110929908/110891265/110879703/110916505/110926343/110885871/110930717/110903910/110898389/110935805	LOC110895209/LOC110918197/LOC110929299/LOC110915392/LOC110894224/LOC110865230/LOC110868740/LOC110937331/LOC110865144/LOC110864719/LOC110878297/LOC110885627/LOC110878373/LOC110884739/LOC110890037/LOC110909316/LOC110877473/LOC110921272/LOC110900006/LOC110897396/LOC110870314/LOC110903846/LOC110865665/LOC110929908/LOC110891265/LOC110879703/LOC110916505/LOC110926343/LOC110885871/LOC110930717/LOC110903…	33
BP	GO:0034404	nucleobase-containing small molecule biosynthetic process	17/1061	70/10643	0.0003976	0.00280155	110912883/110925931/110935992/110909022/110899036/110916150/110915413/110930517/110899468/110891332/110879516/110878007/110882039/110864940/110921418/110905169/110897855	LOC110912883/LOC110925931/LOC110935992/LOC110909022/LOC110899036/LOC110916150/LOC110915413/LOC110930517/LOC110899468/LOC110891332/LOC110879516/LOC110878007/LOC110882039/LOC110864940/LOC110921418/LOC110905169/LOC110897855	17
BP	GO:0046434	organophosphate catabolic process	16/1061	64/10643	0.000412046	0.00285935	110912883/110925931/110935992/110909022/110899036/110916150/110915413/110930517/110899468/110891332/110878373/110879516/110878007/110882039/110864940/110905169	LOC110912883/LOC110925931/LOC110935992/LOC110909022/LOC110899036/LOC110916150/LOC110915413/LOC110930517/LOC110899468/LOC110891332/LOC110878373/LOC110879516/LOC110878007/LOC110882039/LOC110864940/LOC110905169	16
BP	GO:1901137	carbohydrate derivative biosynthetic process	35/1061	198/10643	0.000543809	0.00354296	110912883/110877347/110899401/110906421/110939630/110898552/110925931/110910794/110935992/110909022/110872399/110899036/110916150/110915413/110930517/110899468/110891332/110864768/110865126/110879516/110878007/110942326/110883824/110882039/novel.4704/110864940/110864880/110928684/110893776/110886942/110921418/110911790/110905169/110897855/novel.4718	LOC110912883/LOC110877347/LOC110899401/LOC110906421/LOC110939630/LOC110898552/LOC110925931/LOC110910794/LOC110935992/LOC110909022/LOC110872399/LOC110899036/LOC110916150/LOC110915413/LOC110930517/LOC110899468/LOC110891332/LOC110864768/LOC110865126/LOC110879516/LOC110878007/LOC110942326/LOC110883824/LOC110882039/-/LOC110864940/LOC110864880/LOC110928684/LOC110893776/LOC110886942/LOC110921418/LOC1109…	35
BP	GO:0015985	energy coupled proton transport, down electrochemical gradient	10/1061	31/10643	0.00058268	0.00354296	110939630/110898552/110910794/110942326/110883824/novel.4704/110864880/110893776/110886942/novel.4718	LOC110939630/LOC110898552/LOC110910794/LOC110942326/LOC110883824/-/LOC110864880/LOC110893776/LOC110886942/-	10
BP	GO:0015986	ATP synthesis coupled proton transport	10/1061	31/10643	0.00058268	0.00354296	110939630/110898552/110910794/110942326/110883824/novel.4704/110864880/110893776/110886942/novel.4718	LOC110939630/LOC110898552/LOC110910794/LOC110942326/LOC110883824/-/LOC110864880/LOC110893776/LOC110886942/-	10
BP	GO:0006165	nucleoside diphosphate phosphorylation	16/1061	66/10643	0.000596343	0.00354296	110912883/110925931/110935992/110909022/110899036/110916150/110915413/110930517/110899468/110891332/110879516/110878007/110882039/110864940/110921418/110905169	LOC110912883/LOC110925931/LOC110935992/LOC110909022/LOC110899036/LOC110916150/LOC110915413/LOC110930517/LOC110899468/LOC110891332/LOC110879516/LOC110878007/LOC110882039/LOC110864940/LOC110921418/LOC110905169	16
BP	GO:0046939	nucleotide phosphorylation	16/1061	66/10643	0.000596343	0.00354296	110912883/110925931/110935992/110909022/110899036/110916150/110915413/110930517/110899468/110891332/110879516/110878007/110882039/110864940/110921418/110905169	LOC110912883/LOC110925931/LOC110935992/LOC110909022/LOC110899036/LOC110916150/LOC110915413/LOC110930517/LOC110899468/LOC110891332/LOC110879516/LOC110878007/LOC110882039/LOC110864940/LOC110921418/LOC110905169	16
BP	GO:0006096	glycolytic process	15/1061	60/10643	0.000618858	0.00354296	110912883/110925931/110935992/110909022/110899036/110916150/110915413/110930517/110899468/110891332/110879516/110878007/110882039/110864940/110905169	LOC110912883/LOC110925931/LOC110935992/LOC110909022/LOC110899036/LOC110916150/LOC110915413/LOC110930517/LOC110899468/LOC110891332/LOC110879516/LOC110878007/LOC110882039/LOC110864940/LOC110905169	15
BP	GO:0006757	ATP generation from ADP	15/1061	60/10643	0.000618858	0.00354296	110912883/110925931/110935992/110909022/110899036/110916150/110915413/110930517/110899468/110891332/110879516/110878007/110882039/110864940/110905169	LOC110912883/LOC110925931/LOC110935992/LOC110909022/LOC110899036/LOC110916150/LOC110915413/LOC110930517/LOC110899468/LOC110891332/LOC110879516/LOC110878007/LOC110882039/LOC110864940/LOC110905169	15
BP	GO:0009135	purine nucleoside diphosphate metabolic process	15/1061	60/10643	0.000618858	0.00354296	110912883/110925931/110935992/110909022/110899036/110916150/110915413/110930517/110899468/110891332/110879516/110878007/110882039/110864940/110905169	LOC110912883/LOC110925931/LOC110935992/LOC110909022/LOC110899036/LOC110916150/LOC110915413/LOC110930517/LOC110899468/LOC110891332/LOC110879516/LOC110878007/LOC110882039/LOC110864940/LOC110905169	15
BP	GO:0009166	nucleotide catabolic process	15/1061	60/10643	0.000618858	0.00354296	110912883/110925931/110935992/110909022/110899036/110916150/110915413/110930517/110899468/110891332/110879516/110878007/110882039/110864940/110905169	LOC110912883/LOC110925931/LOC110935992/LOC110909022/LOC110899036/LOC110916150/LOC110915413/LOC110930517/LOC110899468/LOC110891332/LOC110879516/LOC110878007/LOC110882039/LOC110864940/LOC110905169	15
BP	GO:0009179	purine ribonucleoside diphosphate metabolic process	15/1061	60/10643	0.000618858	0.00354296	110912883/110925931/110935992/110909022/110899036/110916150/110915413/110930517/110899468/110891332/110879516/110878007/110882039/110864940/110905169	LOC110912883/LOC110925931/LOC110935992/LOC110909022/LOC110899036/LOC110916150/LOC110915413/LOC110930517/LOC110899468/LOC110891332/LOC110879516/LOC110878007/LOC110882039/LOC110864940/LOC110905169	15
BP	GO:0009185	ribonucleoside diphosphate metabolic process	15/1061	60/10643	0.000618858	0.00354296	110912883/110925931/110935992/110909022/110899036/110916150/110915413/110930517/110899468/110891332/110879516/110878007/110882039/110864940/110905169	LOC110912883/LOC110925931/LOC110935992/LOC110909022/LOC110899036/LOC110916150/LOC110915413/LOC110930517/LOC110899468/LOC110891332/LOC110879516/LOC110878007/LOC110882039/LOC110864940/LOC110905169	15
BP	GO:0042866	pyruvate biosynthetic process	15/1061	60/10643	0.000618858	0.00354296	110912883/110925931/110935992/110909022/110899036/110916150/110915413/110930517/110899468/110891332/110879516/110878007/110882039/110864940/110905169	LOC110912883/LOC110925931/LOC110935992/LOC110909022/LOC110899036/LOC110916150/LOC110915413/LOC110930517/LOC110899468/LOC110891332/LOC110879516/LOC110878007/LOC110882039/LOC110864940/LOC110905169	15
BP	GO:0046031	ADP metabolic process	15/1061	60/10643	0.000618858	0.00354296	110912883/110925931/110935992/110909022/110899036/110916150/110915413/110930517/110899468/110891332/110879516/110878007/110882039/110864940/110905169	LOC110912883/LOC110925931/LOC110935992/LOC110909022/LOC110899036/LOC110916150/LOC110915413/LOC110930517/LOC110899468/LOC110891332/LOC110879516/LOC110878007/LOC110882039/LOC110864940/LOC110905169	15
BP	GO:1901292	nucleoside phosphate catabolic process	15/1061	60/10643	0.000618858	0.00354296	110912883/110925931/110935992/110909022/110899036/110916150/110915413/110930517/110899468/110891332/110879516/110878007/110882039/110864940/110905169	LOC110912883/LOC110925931/LOC110935992/LOC110909022/LOC110899036/LOC110916150/LOC110915413/LOC110930517/LOC110899468/LOC110891332/LOC110879516/LOC110878007/LOC110882039/LOC110864940/LOC110905169	15
MF	GO:0016868	intramolecular transferase activity, phosphotransferases	8/1500	19/16726	0.000125883	0.00392528	110926551/110908878/110904663/110926316/110909989/110864768/110884435/110915197	LOC110926551/LOC110908878/LOC110904663/LOC110926316/LOC110909989/LOC110864768/LOC110884435/LOC110915197	8
BP	GO:0009132	nucleoside diphosphate metabolic process	16/1061	69/10643	0.00100263	0.00566921	110912883/110925931/110935992/110909022/110899036/110916150/110915413/110930517/110899468/110891332/110879516/110878007/110882039/110864940/110921418/110905169	LOC110912883/LOC110925931/LOC110935992/LOC110909022/LOC110899036/LOC110916150/LOC110915413/LOC110930517/LOC110899468/LOC110891332/LOC110879516/LOC110878007/LOC110882039/LOC110864940/LOC110921418/LOC110905169	16
MF	GO:0016701	oxidoreductase activity, acting on single donors with incorporation of molecular oxygen	14/1500	55/16726	0.000264889	0.00617203	110915626/110923172/110937034/110898667/110898671/110908712/110898465/110876540/110927144/110899790/110883872/110898673/110941946/110936810	LOC110915626/LOC110923172/LOC110937034/LOC110898667/LOC110898671/LOC110908712/LOC110898465/LOC110876540/LOC110927144/LOC110899790/LOC110883872/LOC110898673/LOC110941946/LOC110936810	14
MF	GO:0016702	oxidoreductase activity, acting on single donors with incorporation of molecular oxygen, incorporation of two atoms of oxygen	11/1500	37/16726	0.000277423	0.00617203	110915626/110923172/110937034/110898667/110898671/110898465/110876540/110927144/110883872/110898673/110941946	LOC110915626/LOC110923172/LOC110937034/LOC110898667/LOC110898671/LOC110898465/LOC110876540/LOC110927144/LOC110883872/LOC110898673/LOC110941946	11
MF	GO:0016791	phosphatase activity	17/1500	75/16726	0.000278992	0.00617203	110897407/110909012/110877738/110903973/110865321/110943969/110893893/110880208/110908288/110904916/110927134/110890721/110867555/110873095/110882959/110937926/110904344	LOC110897407/LOC110909012/LOC110877738/LOC110903973/LOC110865321/LOC110943969/LOC110893893/LOC110880208/LOC110908288/LOC110904916/LOC110927134/LOC110890721/LOC110867555/LOC110873095/LOC110882959/LOC110937926/LOC110904344	17
MF	GO:0016717	oxidoreductase activity, acting on paired donors, with oxidation of a pair of donors resulting in the reduction of molecular oxygen to two molecules of water	9/1500	26/16726	0.000279488	0.00617203	110907224/110890752/110867681/110865281/110868972/110885030/110865277/110938220/110878160	LOC110907224/LOC110890752/LOC110867681/LOC110865281/LOC110868972/LOC110885030/LOC110865277/LOC110938220/LOC110878160	9
MF	GO:0016679	oxidoreductase activity, acting on diphenols and related substances as donors	8/1500	21/16726	0.000287908	0.00617203	110912629/110939593/110929744/110899230/110898900/110889779/110930044/110930058	LOC110912629/LOC110939593/LOC110929744/LOC110899230/LOC110898900/LOC110889779/LOC110930044/LOC110930058	8
BP	GO:0006766	vitamin metabolic process	8/1061	23/10643	0.00118712	0.00639651	110880108/110897428/110926472/110865490/110879833/110874405/110923557/110917963	LOC110880108/LOC110897428/LOC110926472/LOC110865490/LOC110879833/LOC110874405/LOC110923557/LOC110917963	8
BP	GO:0006767	water-soluble vitamin metabolic process	8/1061	23/10643	0.00118712	0.00639651	110880108/110897428/110926472/110865490/110879833/110874405/110923557/110917963	LOC110880108/LOC110897428/LOC110926472/LOC110865490/LOC110879833/LOC110874405/LOC110923557/LOC110917963	8
BP	GO:0009110	vitamin biosynthetic process	8/1061	23/10643	0.00118712	0.00639651	110880108/110897428/110926472/110865490/110879833/110874405/110923557/110917963	LOC110880108/LOC110897428/LOC110926472/LOC110865490/LOC110879833/LOC110874405/LOC110923557/LOC110917963	8
BP	GO:0042364	water-soluble vitamin biosynthetic process	8/1061	23/10643	0.00118712	0.00639651	110880108/110897428/110926472/110865490/110879833/110874405/110923557/110917963	LOC110880108/LOC110897428/LOC110926472/LOC110865490/LOC110879833/LOC110874405/LOC110923557/LOC110917963	8
BP	GO:0016053	organic acid biosynthetic process	36/1061	217/10643	0.00150396	0.00791741	110913018/110928848/110912883/110890891/110883802/110926857/110919696/110928568/110925931/110935992/110909022/110899036/110916150/110915413/110930517/110899468/110942378/110891332/110879516/110877928/110878007/110917085/110868287/110941290/110882039/110868551/110864940/110884250/110909005/110889392/110904216/110912807/110898235/110864319/110905169/110911054	LOC110913018/LOC110928848/LOC110912883/LOC110890891/LOC110883802/LOC110926857/LOC110919696/LOC110928568/LOC110925931/LOC110935992/LOC110909022/LOC110899036/LOC110916150/LOC110915413/LOC110930517/LOC110899468/LOC110942378/LOC110891332/LOC110879516/LOC110877928/LOC110878007/LOC110917085/LOC110868287/LOC110941290/LOC110882039/LOC110868551/LOC110864940/LOC110884250/LOC110909005/LOC110889392/LOC110904…	36
BP	GO:0046394	carboxylic acid biosynthetic process	36/1061	217/10643	0.00150396	0.00791741	110913018/110928848/110912883/110890891/110883802/110926857/110919696/110928568/110925931/110935992/110909022/110899036/110916150/110915413/110930517/110899468/110942378/110891332/110879516/110877928/110878007/110917085/110868287/110941290/110882039/110868551/110864940/110884250/110909005/110889392/110904216/110912807/110898235/110864319/110905169/110911054	LOC110913018/LOC110928848/LOC110912883/LOC110890891/LOC110883802/LOC110926857/LOC110919696/LOC110928568/LOC110925931/LOC110935992/LOC110909022/LOC110899036/LOC110916150/LOC110915413/LOC110930517/LOC110899468/LOC110942378/LOC110891332/LOC110879516/LOC110877928/LOC110878007/LOC110917085/LOC110868287/LOC110941290/LOC110882039/LOC110868551/LOC110864940/LOC110884250/LOC110909005/LOC110889392/LOC110904…	36
MF	GO:0004427	inorganic diphosphatase activity	7/1500	17/16726	0.000399134	0.00794727	110904415/110893917/110868037/110891197/110912447/110877370/novel.4678	LOC110904415/LOC110893917/LOC110868037/LOC110891197/LOC110912447/LOC110877370/-	7
MF	GO:0016860	intramolecular oxidoreductase activity	8/1500	22/16726	0.000417058	0.00794727	110908072/110879516/110872908/110878007/110923331/110865976/110911456/110894631	LOC110908072/LOC110879516/LOC110872908/LOC110878007/LOC110923331/LOC110865976/LOC110911456/LOC110894631	8
MF	GO:0051213	dioxygenase activity	11/1500	40/16726	0.000583783	0.0105388	110915626/110923172/110937034/110898667/110898671/110898465/110876540/110927144/110883872/110898673/110941946	LOC110915626/LOC110923172/LOC110937034/LOC110898667/LOC110898671/LOC110898465/LOC110876540/LOC110927144/LOC110883872/LOC110898673/LOC110941946	11
BP	GO:0006720	isoprenoid metabolic process	10/1061	36/10643	0.00210645	0.0108399	110895200/110929958/110904306/110872284/110928451/110885948/110930441/110908647/110878757/110904982	LOC110895200/LOC110929958/LOC110904306/LOC110872284/LOC110928451/LOC110885948/LOC110930441/LOC110908647/LOC110878757/LOC110904982	10
BP	GO:0008299	isoprenoid biosynthetic process	10/1061	36/10643	0.00210645	0.0108399	110895200/110929958/110904306/110872284/110928451/110885948/110930441/110908647/110878757/110904982	LOC110895200/LOC110929958/LOC110904306/LOC110872284/LOC110928451/LOC110885948/LOC110930441/LOC110908647/LOC110878757/LOC110904982	10
BP	GO:0016226	iron-sulfur cluster assembly	6/1061	15/10643	0.0021944	0.0110443	110944547/110864535/110868905/110920573/110884272/110915949	LOC110944547/LOC110864535/LOC110868905/LOC110920573/LOC110884272/LOC110915949	6
BP	GO:0031163	metallo-sulfur cluster assembly	6/1061	15/10643	0.0021944	0.0110443	110944547/110864535/110868905/110920573/110884272/110915949	LOC110944547/LOC110864535/LOC110868905/LOC110920573/LOC110884272/LOC110915949	6
BP	GO:0042440	pigment metabolic process	7/1061	20/10643	0.00231746	0.0114216	110863854/110928451/110879974/110890086/110878757/110865304/110927100	LOC110863854/LOC110928451/LOC110879974/LOC110890086/LOC110878757/LOC110865304/LOC110927100	7
BP	GO:0015672	monovalent inorganic cation transport	20/1061	102/10643	0.00231922	0.0114216	110937668/110939630/110898552/110910794/110931061/110900371/110942326/110884225/110883824/novel.4704/110864880/110911651/110893776/110886942/110920505/110899559/110911546/110872003/novel.4718/110884784	LOC110937668/LOC110939630/LOC110898552/LOC110910794/LOC110931061/LOC110900371/LOC110942326/LOC110884225/LOC110883824/-/LOC110864880/LOC110911651/LOC110893776/LOC110886942/LOC110920505/LOC110899559/LOC110911546/LOC110872003/-/LOC110884784	20
BP	GO:1902600	proton transmembrane transport	15/1061	68/10643	0.0024209	0.0117954	110939630/110898552/110910794/110942326/110883824/novel.4704/110864880/110911651/110893776/110886942/110920505/110899559/110911546/110872003/novel.4718	LOC110939630/LOC110898552/LOC110910794/LOC110942326/LOC110883824/-/LOC110864880/LOC110911651/LOC110893776/LOC110886942/LOC110920505/LOC110899559/LOC110911546/LOC110872003/-	15
MF	GO:0050662	coenzyme binding	55/1500	396/16726	0.000728028	0.0124857	110895635/110905132/110929299/110897535/110921076/110915392/110865087/110885780/110898419/110894224/110865230/110891428/110930225/110908053/110865144/110895482/110864719/110885627/110878373/110884739/110903718/110917231/110879810/110875304/110894002/110890733/110915700/110921391/110878986/110942927/110890037/110918150/110877473/110921272/110909048/110900140/110897396/110868781/110872789/110870314…	LOC110895635/LOC110905132/LOC110929299/LOC110897535/LOC110921076/LOC110915392/LOC110865087/LOC110885780/LOC110898419/LOC110894224/LOC110865230/LOC110891428/LOC110930225/LOC110908053/LOC110865144/LOC110895482/LOC110864719/LOC110885627/LOC110878373/LOC110884739/LOC110903718/LOC110917231/LOC110879810/LOC110875304/LOC110894002/LOC110890733/LOC110915700/LOC110921391/LOC110878986/LOC110942927/LOC110890…	55
MF	GO:0015078	proton transmembrane transporter activity	19/1500	96/16726	0.000777458	0.0126985	110927242/110937668/110939630/110898552/110910794/110931061/110900371/110942326/110883824/novel.4704/110864880/110911651/110893776/110886942/110920505/110899559/110911546/novel.4718/110915881	LOC110927242/LOC110937668/LOC110939630/LOC110898552/LOC110910794/LOC110931061/LOC110900371/LOC110942326/LOC110883824/-/LOC110864880/LOC110911651/LOC110893776/LOC110886942/LOC110920505/LOC110899559/LOC110911546/-/LOC110915881	19
BP	GO:0009611	response to wounding	5/1061	11/10643	0.00269598	0.0129974	110937731/110937716/110937706/110936166/110936141	LOC110937731/LOC110937716/LOC110937706/LOC110936166/LOC110936141	5
BP	GO:0000160	phosphorelay signal transduction system	12/1061	50/10643	0.003064	0.0146178	110872992/110893934/110879774/110873837/110868813/110894949/110904364/110867273/110895017/110894634/110895247/110936918	LOC110872992/LOC110893934/LOC110879774/LOC110873837/LOC110868813/LOC110894949/LOC110904364/LOC110867273/LOC110895017/LOC110894634/LOC110895247/LOC110936918	12
BP	GO:0006418	tRNA aminoacylation for protein translation	14/1061	63/10643	0.00310206	0.0146469	110877764/110894710/110906664/110926487/110920890/110930570/110886001/110921564/110869276/110884193/110898738/110937560/110884133/110929145	LOC110877764/LOC110894710/LOC110906664/LOC110926487/LOC110920890/LOC110930570/LOC110886001/LOC110921564/LOC110869276/LOC110884193/LOC110898738/LOC110937560/LOC110884133/LOC110929145	14
MF	GO:0019203	carbohydrate phosphatase activity	5/1500	10/16726	0.000988377	0.0147397	110865321/110943969/110904916/110937926/110904344	LOC110865321/LOC110943969/LOC110904916/LOC110937926/LOC110904344	5
MF	GO:0050308	sugar-phosphatase activity	5/1500	10/16726	0.000988377	0.0147397	110865321/110943969/110904916/110937926/110904344	LOC110865321/LOC110943969/LOC110904916/LOC110937926/LOC110904344	5
MF	GO:0016866	intramolecular transferase activity	12/1500	49/16726	0.00103852	0.0148422	110926551/110908878/110904663/110926316/110909989/110924043/110864768/110884435/110915197/110904637/110924034/110941028	LOC110926551/LOC110908878/LOC110904663/LOC110926316/LOC110909989/LOC110924043/LOC110864768/LOC110884435/LOC110915197/LOC110904637/LOC110924034/LOC110941028	12
BP	GO:0046700	heterocycle catabolic process	17/1061	84/10643	0.00339838	0.0158822	110912883/110863854/110925931/110935992/110909022/110899036/110916150/110915413/110930517/110899468/110891332/110879516/110878007/110882039/110864940/110905169/110927100	LOC110912883/LOC110863854/LOC110925931/LOC110935992/LOC110909022/LOC110899036/LOC110916150/LOC110915413/LOC110930517/LOC110899468/LOC110891332/LOC110879516/LOC110878007/LOC110882039/LOC110864940/LOC110905169/LOC110927100	17
MF	GO:0016682	oxidoreductase activity, acting on diphenols and related substances as donors, oxygen as acceptor	6/1500	15/16726	0.00126605	0.0173702	110912629/110939593/110899230/110889779/110930044/110930058	LOC110912629/LOC110939593/LOC110899230/LOC110889779/LOC110930044/LOC110930058	6
BP	GO:0044270	cellular nitrogen compound catabolic process	17/1061	85/10643	0.00386359	0.0176953	110912883/110863854/110925931/110935992/110909022/110899036/110916150/110915413/110930517/110899468/110891332/110879516/110878007/110882039/110864940/110905169/110927100	LOC110912883/LOC110863854/LOC110925931/LOC110935992/LOC110909022/LOC110899036/LOC110916150/LOC110915413/LOC110930517/LOC110899468/LOC110891332/LOC110879516/LOC110878007/LOC110882039/LOC110864940/LOC110905169/LOC110927100	17
BP	GO:1901361	organic cyclic compound catabolic process	17/1061	85/10643	0.00386359	0.0176953	110912883/110863854/110925931/110935992/110909022/110899036/110916150/110915413/110930517/110899468/110891332/110879516/110878007/110882039/110864940/110905169/110927100	LOC110912883/LOC110863854/LOC110925931/LOC110935992/LOC110909022/LOC110899036/LOC110916150/LOC110915413/LOC110930517/LOC110899468/LOC110891332/LOC110879516/LOC110878007/LOC110882039/LOC110864940/LOC110905169/LOC110927100	17
BP	GO:0019725	cellular homeostasis	24/1061	136/10643	0.00390379	0.0177023	110897535/110921373/110912952/110929839/110898030/110940923/110898878/110895601/110921833/110936155/110872693/110941033/110890733/110904176/110893739/110918684/110873249/110889644/110941971/110908864/110889065/110884045/110915308/110915343	LOC110897535/LOC110921373/LOC110912952/LOC110929839/LOC110898030/LOC110940923/LOC110898878/LOC110895601/LOC110921833/LOC110936155/LOC110872693/LOC110941033/LOC110890733/LOC110904176/LOC110893739/LOC110918684/LOC110873249/LOC110889644/LOC110941971/LOC110908864/LOC110889065/LOC110884045/LOC110915308/LOC110915343	24
MF	GO:0022804	active transmembrane transporter activity	32/1500	205/16726	0.00139632	0.0184206	110927242/110930059/110937668/110935629/110939630/110884357/110910794/110872013/110940837/110931061/110893917/110900371/110871639/110936317/110898053/110918665/110942326/110873542/110883824/110869266/110910863/110915208/110917743/110864880/110864025/110873432/110877370/110925643/110899559/novel.4678/110879212/110915881	LOC110927242/LOC110930059/LOC110937668/LOC110935629/LOC110939630/LOC110884357/LOC110910794/LOC110872013/LOC110940837/LOC110931061/LOC110893917/LOC110900371/LOC110871639/LOC110936317/LOC110898053/LOC110918665/LOC110942326/LOC110873542/LOC110883824/LOC110869266/LOC110910863/LOC110915208/LOC110917743/LOC110864880/LOC110864025/LOC110873432/LOC110877370/LOC110925643/LOC110899559/-/LOC110879212/LOC1109…	32
BP	GO:0042278	purine nucleoside metabolic process	6/1061	17/10643	0.00455886	0.0200765	110910056/110942324/110905172/110921418/110897855/110935487	LOC110910056/LOC110942324/LOC110905172/LOC110921418/LOC110897855/LOC110935487	6
BP	GO:0046128	purine ribonucleoside metabolic process	6/1061	17/10643	0.00455886	0.0200765	110910056/110942324/110905172/110921418/110897855/110935487	LOC110910056/LOC110942324/LOC110905172/LOC110921418/LOC110897855/LOC110935487	6
BP	GO:1901068	guanosine-containing compound metabolic process	6/1061	17/10643	0.00455886	0.0200765	110910056/110942324/110905172/110921418/110897855/110935487	LOC110910056/LOC110942324/LOC110905172/LOC110921418/LOC110897855/LOC110935487	6
MF	GO:0004867	serine-type endopeptidase inhibitor activity	5/1500	11/16726	0.00167858	0.0205234	110937731/110937716/110937706/110936166/110936141	LOC110937731/LOC110937716/LOC110937706/LOC110936166/LOC110936141	5
MF	GO:0030145	manganese ion binding	5/1500	11/16726	0.00167858	0.0205234	110886944/110909989/110865167/110884435/110921533	LOC110886944/LOC110909989/LOC110865167/LOC110884435/LOC110921533	5
MF	GO:0015291	secondary active transmembrane transporter activity	18/1500	95/16726	0.00177721	0.0205234	110927242/110930059/110937668/110935629/110872013/110940837/110931061/110900371/110936317/110898053/110918665/110873542/110869266/110910863/110915208/110917743/110925643/110915881	LOC110927242/LOC110930059/LOC110937668/LOC110935629/LOC110872013/LOC110940837/LOC110931061/LOC110900371/LOC110936317/LOC110898053/LOC110918665/LOC110873542/LOC110869266/LOC110910863/LOC110915208/LOC110917743/LOC110925643/LOC110915881	18
MF	GO:0004812	aminoacyl-tRNA ligase activity	14/1500	66/16726	0.00185488	0.0205234	110877764/110894710/110906664/110926487/110920890/110930570/110886001/110921564/110869276/110884193/110898738/110937560/110884133/110929145	LOC110877764/LOC110894710/LOC110906664/LOC110926487/LOC110920890/LOC110930570/LOC110886001/LOC110921564/LOC110869276/LOC110884193/LOC110898738/LOC110937560/LOC110884133/LOC110929145	14
MF	GO:0016875	ligase activity, forming carbon-oxygen bonds	14/1500	66/16726	0.00185488	0.0205234	110877764/110894710/110906664/110926487/110920890/110930570/110886001/110921564/110869276/110884193/110898738/110937560/110884133/110929145	LOC110877764/LOC110894710/LOC110906664/LOC110926487/LOC110920890/LOC110930570/LOC110886001/LOC110921564/LOC110869276/LOC110884193/LOC110898738/LOC110937560/LOC110884133/LOC110929145	14
BP	GO:0019439	aromatic compound catabolic process	17/1061	87/10643	0.00495174	0.021599	110912883/110863854/110925931/110935992/110909022/110899036/110916150/110915413/110930517/110899468/110891332/110879516/110878007/110882039/110864940/110905169/110927100	LOC110912883/LOC110863854/LOC110925931/LOC110935992/LOC110909022/LOC110899036/LOC110916150/LOC110915413/LOC110930517/LOC110899468/LOC110891332/LOC110879516/LOC110878007/LOC110882039/LOC110864940/LOC110905169/LOC110927100	17
MF	GO:0022890	inorganic cation transmembrane transporter activity	27/1500	169/16726	0.00226322	0.0242589	110927242/110884531/110941480/110937668/110939630/110898552/110910794/110931061/110900371/110941317/110942326/110884225/110883824/novel.4704/110864880/110908624/110911651/110893776/110886942/110920505/110867538/110899559/110911546/novel.4718/110936699/110921156/110915881	LOC110927242/LOC110884531/LOC110941480/LOC110937668/LOC110939630/LOC110898552/LOC110910794/LOC110931061/LOC110900371/LOC110941317/LOC110942326/LOC110884225/LOC110883824/-/LOC110864880/LOC110908624/LOC110911651/LOC110893776/LOC110886942/LOC110920505/LOC110867538/LOC110899559/LOC110911546/-/LOC110936699/LOC110921156/LOC110915881	27
BP	GO:0034655	nucleobase-containing compound catabolic process	15/1061	74/10643	0.00565664	0.0244409	110912883/110925931/110935992/110909022/110899036/110916150/110915413/110930517/110899468/110891332/110879516/110878007/110882039/110864940/110905169	LOC110912883/LOC110925931/LOC110935992/LOC110909022/LOC110899036/LOC110916150/LOC110915413/LOC110930517/LOC110899468/LOC110891332/LOC110879516/LOC110878007/LOC110882039/LOC110864940/LOC110905169	15
BP	GO:0006778	porphyrin-containing compound metabolic process	6/1061	18/10643	0.00626993	0.0266474	110863854/110879974/110930781/110890086/110923153/110927100	LOC110863854/LOC110879974/LOC110930781/LOC110890086/LOC110923153/LOC110927100	6
BP	GO:0046148	pigment biosynthetic process	5/1061	13/10643	0.00633857	0.0266474	110928451/110879974/110890086/110878757/110865304	LOC110928451/LOC110879974/LOC110890086/LOC110878757/LOC110865304	5
BP	GO:0043038	amino acid activation	14/1061	68/10643	0.00640003	0.0266474	110877764/110894710/110906664/110926487/110920890/110930570/110886001/110921564/110869276/110884193/110898738/110937560/110884133/110929145	LOC110877764/LOC110894710/LOC110906664/LOC110926487/LOC110920890/LOC110930570/LOC110886001/LOC110921564/LOC110869276/LOC110884193/LOC110898738/LOC110937560/LOC110884133/LOC110929145	14
BP	GO:0043039	tRNA aminoacylation	14/1061	68/10643	0.00640003	0.0266474	110877764/110894710/110906664/110926487/110920890/110930570/110886001/110921564/110869276/110884193/110898738/110937560/110884133/110929145	LOC110877764/LOC110894710/LOC110906664/LOC110926487/LOC110920890/LOC110930570/LOC110886001/LOC110921564/LOC110869276/LOC110884193/LOC110898738/LOC110937560/LOC110884133/LOC110929145	14
BP	GO:0008652	cellular amino acid biosynthetic process	15/1061	76/10643	0.00730112	0.0301254	110913018/110928848/110883802/110926857/110919696/110928568/110942378/110877928/110941290/110868551/110909005/110889392/110904216/110898235/110911054	LOC110913018/LOC110928848/LOC110883802/LOC110926857/LOC110919696/LOC110928568/LOC110942378/LOC110877928/LOC110941290/LOC110868551/LOC110909005/LOC110889392/LOC110904216/LOC110898235/LOC110911054	15
BP	GO:0098655	cation transmembrane transport	18/1061	98/10643	0.00761393	0.0305893	110884531/110939630/110898552/110910794/110941317/110942326/110884225/110883824/novel.4704/110864880/110911651/110893776/110886942/110920505/110899559/110911546/110872003/novel.4718	LOC110884531/LOC110939630/LOC110898552/LOC110910794/LOC110941317/LOC110942326/LOC110884225/LOC110883824/-/LOC110864880/LOC110911651/LOC110893776/LOC110886942/LOC110920505/LOC110899559/LOC110911546/LOC110872003/-	18
BP	GO:0098660	inorganic ion transmembrane transport	18/1061	98/10643	0.00761393	0.0305893	110884531/110939630/110898552/110910794/110941317/110942326/110884225/110883824/novel.4704/110864880/110911651/110893776/110886942/110920505/110899559/110911546/110872003/novel.4718	LOC110884531/LOC110939630/LOC110898552/LOC110910794/LOC110941317/LOC110942326/LOC110884225/LOC110883824/-/LOC110864880/LOC110911651/LOC110893776/LOC110886942/LOC110920505/LOC110899559/LOC110911546/LOC110872003/-	18
BP	GO:0098662	inorganic cation transmembrane transport	18/1061	98/10643	0.00761393	0.0305893	110884531/110939630/110898552/110910794/110941317/110942326/110884225/110883824/novel.4704/110864880/110911651/110893776/110886942/110920505/110899559/110911546/110872003/novel.4718	LOC110884531/LOC110939630/LOC110898552/LOC110910794/LOC110941317/LOC110942326/LOC110884225/LOC110883824/-/LOC110864880/LOC110911651/LOC110893776/LOC110886942/LOC110920505/LOC110899559/LOC110911546/LOC110872003/-	18
MF	GO:0015238	drug transmembrane transporter activity	13/1500	62/16726	0.00296328	0.0308001	110930059/110935629/110872013/110940837/110936317/110898053/110918665/110873542/110869266/110910863/110915208/110917743/110925643	LOC110930059/LOC110935629/LOC110872013/LOC110940837/LOC110936317/LOC110898053/LOC110918665/LOC110873542/LOC110869266/LOC110910863/LOC110915208/LOC110917743/LOC110925643	13
MF	GO:0031072	heat shock protein binding	7/1500	23/16726	0.00311593	0.0311262	110894285/110877375/110884831/110890350/110899402/110890889/110885727	LOC110894285/LOC110877375/LOC110884831/LOC110890350/LOC110899402/LOC110890889/LOC110885727	7
MF	GO:0010181	FMN binding	8/1500	29/16726	0.00317615	0.0311262	110905132/110885780/110894002/110918150/110909048/110894003/110926509/110884693	LOC110905132/LOC110885780/LOC110894002/LOC110918150/LOC110909048/LOC110894003/LOC110926509/LOC110884693	8
MF	GO:0015297	antiporter activity	16/1500	86/16726	0.00376659	0.0358835	110930059/110937668/110935629/110872013/110940837/110931061/110900371/110936317/110898053/110918665/110873542/110869266/110910863/110915208/110917743/110925643	LOC110930059/LOC110937668/LOC110935629/LOC110872013/LOC110940837/LOC110931061/LOC110900371/LOC110936317/LOC110898053/LOC110918665/LOC110873542/LOC110869266/LOC110910863/LOC110915208/LOC110917743/LOC110925643	16
MF	GO:0003993	acid phosphatase activity	8/1500	30/16726	0.00399609	0.0358835	110909012/110903973/110893893/110908288/110927134/110890721/110867555/110882959	LOC110909012/LOC110903973/LOC110893893/LOC110908288/LOC110927134/LOC110890721/LOC110867555/LOC110882959	8
MF	GO:0015077	monovalent inorganic cation transmembrane transporter activity	20/1500	118/16726	0.00402282	0.0358835	110927242/110937668/110939630/110898552/110910794/110931061/110900371/110942326/110884225/110883824/novel.4704/110864880/110911651/110893776/110886942/110920505/110899559/110911546/novel.4718/110915881	LOC110927242/LOC110937668/LOC110939630/LOC110898552/LOC110910794/LOC110931061/LOC110900371/LOC110942326/LOC110884225/LOC110883824/-/LOC110864880/LOC110911651/LOC110893776/LOC110886942/LOC110920505/LOC110899559/LOC110911546/-/LOC110915881	20
MF	GO:0140101	catalytic activity, acting on a tRNA	18/1500	103/16726	0.004433	0.0358835	110877764/110894710/110906664/110926487/110920890/110930570/110886001/110921564/110872789/110869276/110883761/110884193/110898738/110937560/110884133/110866021/110929145/110889804	LOC110877764/LOC110894710/LOC110906664/LOC110926487/LOC110920890/LOC110930570/LOC110886001/LOC110921564/LOC110872789/LOC110869276/LOC110883761/LOC110884193/LOC110898738/LOC110937560/LOC110884133/LOC110866021/LOC110929145/LOC110889804	18
MF	GO:0015075	ion transmembrane transporter activity	44/1500	329/16726	0.00477764	0.0358835	110927242/110884531/110941480/110930059/110937668/110870644/110935629/110939630/110898552/110910794/110935981/110931061/110900371/110938188/110941317/110942326/110878437/110884225/110883824/110892471/110885965/novel.4704/110891616/110922034/110864880/110908624/110866007/110911651/110893776/110929355/110886942/110920505/110867538/110899559/110911546/110908589/110894147/110877572/110911457/11092974…	LOC110927242/LOC110884531/LOC110941480/LOC110930059/LOC110937668/LOC110870644/LOC110935629/LOC110939630/LOC110898552/LOC110910794/LOC110935981/LOC110931061/LOC110900371/LOC110938188/LOC110941317/LOC110942326/LOC110878437/LOC110884225/LOC110883824/LOC110892471/LOC110885965/-/LOC110891616/LOC110922034/LOC110864880/LOC110908624/LOC110866007/LOC110911651/LOC110893776/LOC110929355/LOC110886942/LOC1109…	44
MF	GO:0004866	endopeptidase inhibitor activity	8/1500	31/16726	0.00497002	0.0358835	110937731/110937716/110937706/110936166/110944054/110944056/110900204/110936141	LOC110937731/LOC110937716/LOC110937706/LOC110936166/LOC110944054/LOC110944056/LOC110900204/LOC110936141	8
MF	GO:0030414	peptidase inhibitor activity	8/1500	31/16726	0.00497002	0.0358835	110937731/110937716/110937706/110936166/110944054/110944056/110900204/110936141	LOC110937731/LOC110937716/LOC110937706/LOC110936166/LOC110944054/LOC110944056/LOC110900204/LOC110936141	8
MF	GO:0061134	peptidase regulator activity	8/1500	31/16726	0.00497002	0.0358835	110937731/110937716/110937706/110936166/110944054/110944056/110900204/110936141	LOC110937731/LOC110937716/LOC110937706/LOC110936166/LOC110944054/LOC110944056/LOC110900204/LOC110936141	8
MF	GO:0061135	endopeptidase regulator activity	8/1500	31/16726	0.00497002	0.0358835	110937731/110937716/110937706/110936166/110944054/110944056/110900204/110936141	LOC110937731/LOC110937716/LOC110937706/LOC110936166/LOC110944054/LOC110944056/LOC110900204/LOC110936141	8
MF	GO:0019829	cation-transporting ATPase activity	6/1500	19/16726	0.0050216	0.0358835	110939630/110910794/110942326/110883824/110864880/110899559	LOC110939630/LOC110910794/LOC110942326/LOC110883824/LOC110864880/LOC110899559	6
MF	GO:0022853	active ion transmembrane transporter activity	6/1500	19/16726	0.0050216	0.0358835	110939630/110910794/110942326/110883824/110864880/110899559	LOC110939630/LOC110910794/LOC110942326/LOC110883824/LOC110864880/LOC110899559	6
MF	GO:0042625	ATPase coupled ion transmembrane transporter activity	6/1500	19/16726	0.0050216	0.0358835	110939630/110910794/110942326/110883824/110864880/110899559	LOC110939630/LOC110910794/LOC110942326/LOC110883824/LOC110864880/LOC110899559	6
MF	GO:0044769	ATPase activity, coupled to transmembrane movement of ions, rotational mechanism	6/1500	19/16726	0.0050216	0.0358835	110939630/110910794/110942326/110883824/110864880/110899559	LOC110939630/LOC110910794/LOC110942326/LOC110883824/LOC110864880/LOC110899559	6
BP	GO:0019318	hexose metabolic process	7/1061	25/10643	0.0092363	0.0364675	110909989/110879516/110878007/110884435/110873257/110926343/110903921	LOC110909989/LOC110879516/LOC110878007/LOC110884435/LOC110873257/LOC110926343/LOC110903921	7
BP	GO:0044272	sulfur compound biosynthetic process	7/1061	25/10643	0.0092363	0.0364675	110897428/110904492/110868285/110889392/110898235/110941174/110910129	LOC110897428/LOC110904492/LOC110868285/LOC110889392/LOC110898235/LOC110941174/LOC110910129	7
MF	GO:0008324	cation transmembrane transporter activity	29/1500	197/16726	0.00539495	0.0377647	110927242/110884531/110941480/110937668/110939630/110898552/110910794/110931061/110900371/110941317/110942326/110884225/110883824/novel.4704/110891616/110864880/110908624/110911651/110893776/110886942/110920505/110867538/110899559/110911546/110877572/novel.4718/110936699/110921156/110915881	LOC110927242/LOC110884531/LOC110941480/LOC110937668/LOC110939630/LOC110898552/LOC110910794/LOC110931061/LOC110900371/LOC110941317/LOC110942326/LOC110884225/LOC110883824/-/LOC110891616/LOC110864880/LOC110908624/LOC110911651/LOC110893776/LOC110886942/LOC110920505/LOC110867538/LOC110899559/LOC110911546/LOC110877572/-/LOC110936699/LOC110921156/LOC110915881	29
BP	GO:1901615	organic hydroxy compound metabolic process	6/1061	20/10643	0.0110123	0.043108	110880108/110865490/110930253/110879833/110899790/110874405	LOC110880108/LOC110865490/LOC110930253/LOC110879833/LOC110899790/LOC110874405	6
MF	GO:0004175	endopeptidase activity	25/1500	165/16726	0.00648011	0.0436617	110920947/110872721/110908056/110895374/110865979/110894667/110921620/110867937/110898244/110905163/110911045/110864777/110914243/110920608/110926421/110865547/110908965/110897727/110899516/110921750/110904426/110886911/110885167/110935813/110940295	LOC110920947/LOC110872721/LOC110908056/LOC110895374/LOC110865979/LOC110894667/LOC110921620/LOC110867937/LOC110898244/LOC110905163/LOC110911045/LOC110864777/LOC110914243/LOC110920608/LOC110926421/LOC110865547/LOC110908965/LOC110897727/LOC110899516/LOC110921750/LOC110904426/LOC110886911/LOC110885167/LOC110935813/LOC110940295	25
MF	GO:0015318	inorganic molecular entity transmembrane transporter activity	40/1500	298/16726	0.00649197	0.0436617	110927242/110884531/110941480/110937668/110870644/110939630/110898552/110910794/110935981/110931061/110900371/110938188/110941317/110942326/110878437/110884225/110883824/110892471/110885965/novel.4704/110922034/110864880/110908624/110866007/110911651/110893776/110929355/110886942/110920505/110867538/110899559/110911546/110908589/110894147/110911457/110929742/novel.4718/110936699/110921156/1109158…	LOC110927242/LOC110884531/LOC110941480/LOC110937668/LOC110870644/LOC110939630/LOC110898552/LOC110910794/LOC110935981/LOC110931061/LOC110900371/LOC110938188/LOC110941317/LOC110942326/LOC110878437/LOC110884225/LOC110883824/LOC110892471/LOC110885965/-/LOC110922034/LOC110864880/LOC110908624/LOC110866007/LOC110911651/LOC110893776/LOC110929355/LOC110886942/LOC110920505/LOC110867538/LOC110899559/LOC1109…	40
CC	GO:0033177	proton-transporting two-sector ATPase complex, proton-transporting domain	8/342	30/3589	0.00561822	0.0471066	110898552/novel.4704/110911651/110893776/110886942/110920505/110911546/novel.4718	LOC110898552/-/LOC110911651/LOC110893776/LOC110886942/LOC110920505/LOC110911546/-	8
BP	GO:0019684	photosynthesis, light reaction	5/1061	15/10643	0.0124954	0.0484992	novel.2247/novel.1088/110885465/110896250/110864866	-/-/LOC110885465/LOC110896250/LOC110864866	5
CC	GO:0016469	proton-transporting two-sector ATPase complex	12/342	57/3589	0.00628892	0.0489638	110939630/110898552/110910794/novel.4704/110911651/110893776/110886942/110920505/110899559/110911546/110872003/novel.4718	LOC110939630/LOC110898552/LOC110910794/-/LOC110911651/LOC110893776/LOC110886942/LOC110920505/LOC110899559/LOC110911546/LOC110872003/-	12
